# Supplementary material for: Transcriptomic landscape of TIMP3 oncosuppressor activity in thyroid carcinoma
Source: Springer Nature journal article supplement (doi:10.1186/s12935-022-02811-8), 2022-12-12

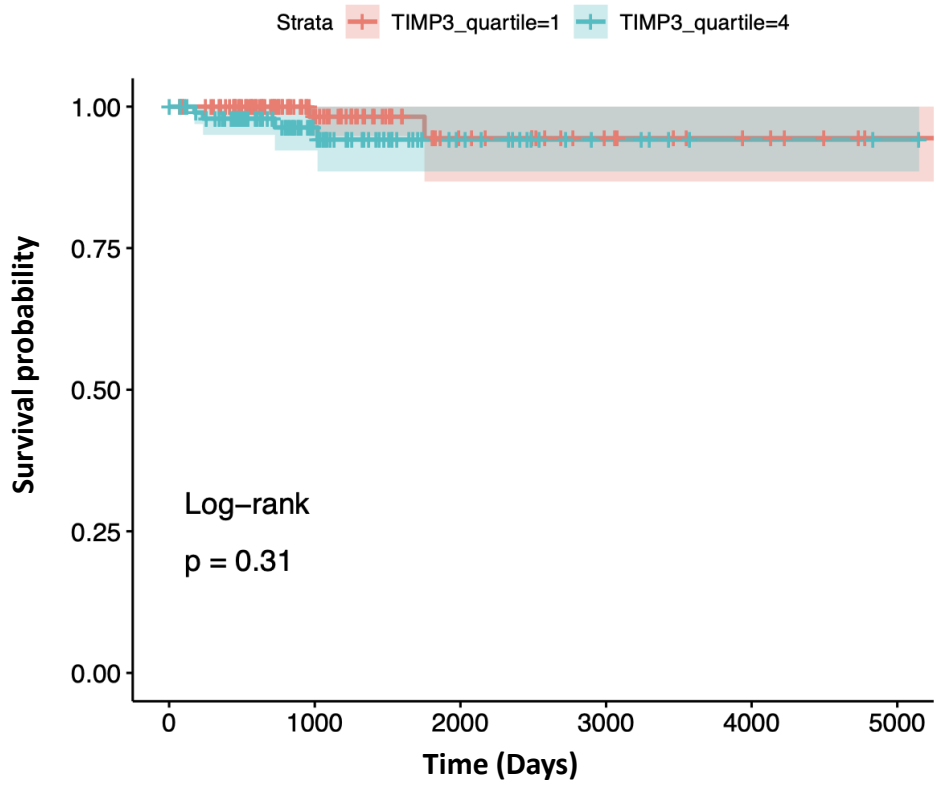

Supplement: MOESM4 [file 12935_2022_2811_MOESM4_ESM-1.pdf]
