# Supplementary material for: Transcriptomic landscape of TIMP3 oncosuppressor activity in thyroid carcinoma
Source: Cancer Cell Int. 2022 Dec 12;22:400. doi: 10.1186/s12935-022-02811-8 (PMC9743531; doi:10.1186/s12935-022-02811-8)
Supplement: Supplementary file 1 — Additional file 1: Table S1. Correlation between TIMP3 expression and TSS/promoter or global methylation levels in quartile I (121 PTCs) and IV (122 PTCs), respectively, from TCGA cohort. Spearman correlation coefficient rho and p-value are reported. Benjamini–Hochberg procedure (BH) was applied for multiple test correction (p-val_adj). Significant results are reported in red. [file 12935_2022_2811_MOESM1_ESM.xlsx]

## Sheet: Foglio1
		TSS/Promoter methylation - gene expression correlation
			rho	P-value	P-val_adj
		TIMP3_quartile I	-0.01	0.531	0.531
		TIMP3_quartile IV	-0.20	0.012	0.024
		Global methylation - gene expression correlation
			rho	P-value	P-val_adj
		TIMP3_quartile I	-0.1	0.15	0.2
		TIMP3_quartile IV	-0.25	0.003	0.012
