# Supplementary material for: Transcriptomic landscape of TIMP3 oncosuppressor activity in thyroid carcinoma
Source: Cancer Cell Int. 2022 Dec 12;22:400. doi: 10.1186/s12935-022-02811-8 (PMC9743531; doi:10.1186/s12935-022-02811-8)
Supplement: Supplementary file 2 — Additional file 2: Table S2. Correlation between TIMP3 and selected hsa-miRNAs expression levels in TIMP3 quartile I and IV (122 PTC cases in each group). Spearman correlation coefficient rho and p-value are reported. Benjamini–Hochberg procedure (BH) was applied for multiple test correction (p-val_adj). Significant results are reported in red. [file 12935_2022_2811_MOESM2_ESM.xlsx]

## Sheet: Sheet1
			hsa-miRNA - gene expression correlation
			TIMP3_quartile	I			IV
			hsa-miRNA	rho	P-value	P-val_adj	rho	P-value	P-val_adj
			hsa-mir-21	-0.278609	0.0019548	0.00781921	-0.131838	0.147582	0.295165
			hsa-mir-221	-0.164453	0.070335	0.09378	-0.0131749	0.885335	0.885335
			hsa-mir-222	-0.16826	0.0640122	0.09378	-0.0286266	0.753962	0.885335
			hsa-mir-373	0.00672277	0.941415	0.941415	-0.169963	0.06126	0.24504
