# Supplementary material for: Transcriptomic landscape of TIMP3 oncosuppressor activity in thyroid carcinoma
Source: Cancer Cell Int. 2022 Dec 12;22:400. doi: 10.1186/s12935-022-02811-8 (PMC9743531; doi:10.1186/s12935-022-02811-8)
Supplement: Supplementary file 3 — Additional file 3: Table S3. Clinical and molecular data of TCGA-PTC tumors in I and IV TIMP3 quartiles. Fisher's exact test measuring the association between TIMP3 expression levels and the occurrence of BRAFV600E mutation and patient characteristics in PTC cases of TCGA cohort for which molecular and clinical information were available. Benjamini–Hochberg procedure (BH) was applied for multiple test correction (adj_p-value). Samples are stratified in I and IV quartiles according to TIMP3 expression levels. [file 12935_2022_2811_MOESM3_ESM.xlsx]

## Sheet: Foglio1
	Molecular lesion	N PTC Samples (241)	quartile I	quartile IV	p-value	adj_p-value
	BRAFV600E	neg (121)	44/119 (37%)	77/122 (63%)	<0.0001	0.003
		pos (120)	75/119 (63%)	45/122 (37%)
	Patient characteristics	N PTC Samples (241)	quartile I	quartile IV	p-value	adj_p-value
	Clinical Stage	I+II (171)	79/120 (66%)	92/121 (76%)	0.0899	0.0899
		III+IV (70)	41/120 (34%)	29/121 (24%)
		N PTC Samples (240)	quartile I	quartile IV	p-value	adj_p-value
	Histological Type	C+F (225)	104/118 (88%)	121/122 (99%)	0.0003	0.0045
		TC (15)	14/118 (12%)	1/122 (1%)
