# Supplementary material for: Transcriptomic landscape of TIMP3 oncosuppressor activity in thyroid carcinoma
Source: Cancer Cell Int. 2022 Dec 12;22:400. doi: 10.1186/s12935-022-02811-8 (PMC9743531; doi:10.1186/s12935-022-02811-8)
Supplement: Supplementary file 5 — Additional file 5: Table S4. Hallmark gene sets significantly enriched in IV versus I TIMP3 quartile. Gene sets were selected on nominal p-value < 0.05 and FDR q-value < 5%. Size and Normalized Enrichment Score (NES) are also reported for each gene set. Up and down- regulated gene sets are ordered according to NES. Red asterisk indicate Hallmark gene sets significantly enriched also in NIM-T23 versus NIM-EV clones. [file 12935_2022_2811_MOESM5_ESM.xlsx]

## Sheet: Foglio1
NAME	SIZE	NES	NOM p-val	FDR q-val
HALLMARK_MYOGENESIS	110	2.095	0	0
HALLMARK_OXIDATIVE_PHOSPHORYLATION	93	1.76773	0.00151057	0.024574
HALLMARK_INTERFERON_GAMMA_RESPONSE	142	-2.85614	0	0
HALLMARK_ALLOGRAFT_REJECTION	131	-2.8335	0	0
HALLMARK_INTERFERON_ALPHA_RESPONSE	72	-2.75038	0	0
HALLMARK_INFLAMMATORY_RESPONSE	116	-2.31258	0	0
HALLMARK_IL2_STAT5_SIGNALING*	111	-1.93532	0	0.00202359
HALLMARK_E2F_TARGETS*	106	-1.89511	0	0.00303775
HALLMARK_TNFA_SIGNALING_VIA_NFKB*	119	-1.86896	0	0.00380631
HALLMARK_P53_PATHWAY	104	-1.8248	0	0.00491249
HALLMARK_KRAS_SIGNALING_UP	119	-1.81482	0	0.00450555
HALLMARK_IL6_JAK_STAT3_SIGNALING	56	-1.79416	0.00257732	0.00453131
HALLMARK_COMPLEMENT	124	-1.71208	0	0.00916505
HALLMARK_APOPTOSIS	89	-1.60342	0.00283286	0.0190451
HALLMARK_G2M_CHECKPOINT*	94	-1.56699	0	0.0242215
HALLMARK_COAGULATION	80	-1.52064	0.0191781	0.0315441
