# Supplementary material for: Transcriptomic landscape of TIMP3 oncosuppressor activity in thyroid carcinoma
Source: Cancer Cell Int. 2022 Dec 12;22:400. doi: 10.1186/s12935-022-02811-8 (PMC9743531; doi:10.1186/s12935-022-02811-8)
Supplement: Supplementary file 6 — Additional file 6: Table S5. GO functional enriched terms in IV versus I TIMP3 quartile. Details of the top 20 significantly enriched GO-BP terms in TIMP3-high versus TIMP3-low TCGA cases by cluster Profiler analysis on 1660 differentially expressed genes with at least 2 absolute FC. [file 12935_2022_2811_MOESM6_ESM.xlsx]

## Sheet: Foglio1
ID	Description	GeneRatio	BgRatio	pvalue	p.adjust	qvalue	geneID	Count
GO:0051480	regulation of cytosolic calcium ion concentration	75/1322	353/18722	3.29864e-18	1.74135e-14	1.31355e-14	ATP2B3/NOS1/DRD1/TAC1/RYR2/AGTR1/GALR1/ATP1A2/AVPR1A/EDNRB/HAP1/BDKRB1/BDKRB2/TRPC5/HRC/PLN/TRPC4/SCGN/CASQ2/CACNB2/CD36/ATP2B2/GPR20/TMEM38A/ADCY5/CALCA/TBXA2R/FZD9/GRIA1/CHRNA9/ANK2/PDE4D/KCNA5/ADCYAP1R1/TRPC6/GLP1R/GATA2/ADRA1D/GPR17/NMB/CCKBR/ITPR1/F2RL3/KCNK3/CACNA1C/P2RY8/JPH2/CALCB/RAMP3/GPR4/PTGER3/P2RY10/CCR2/LIME1/PTGER1/CCR8/P2RX1/GPR174/GALR2/JPH3/CD38/CXCL9/TGM2/CXCL10/P2RY6/ADCY8/GR…	75
GO:0055074	calcium ion homeostasis	87/1322	460/18722	1.49945e-17	2.89792e-14	2.18599e-14	ATP2B3/NOS1/DRD1/TAC1/RYR2/AGTR1/GALR1/ATP1A2/AVPR1A/CCL11/EDNRB/HAP1/BDKRB1/BDKRB2/TRPC5/HRC/PLN/TRPC4/SCGN/STC2/CASQ2/CACNB2/CD36/ATP2B2/GPR20/TMEM38A/ADCY5/CALCA/TBXA2R/FZD9/GRIA1/CHRNA9/ANK2/PDE4D/KCNA5/CCL14/ADCYAP1R1/TRPC6/GLP1R/GATA2/ADRA1D/GPR17/NMB/CCKBR/ITPR1/F2RL3/KCNK3/APOE/CACNA1C/P2RY8/CYP27B1/JPH2/CALCB/RAMP3/GPR4/PTGER3/P2RY10/CCR2/LIME1/PTGER1/CCR8/P2RX1/GPR174/GALR2/JPH3/CD38/CX…	87
GO:0045785	positive regulation of cell adhesion	80/1322	437/18722	2.1259e-15	2.24453e-12	1.69311e-12	SFRP1/MYOC/SELE/VIT/VWC2/RAG1/DMP1/EGR3/NR4A3/KDR/IL6/CD36/WNT4/WNT3A/IGF1/PRKCA/LIMS2/PODXL/FOXF1/TEK/CDH13/HLA-DQB1/B2M/HLA-A/HLA-DRA/CD40LG/PLAUR/SLAMF1/CCR2/RUNX1/HLA-DPB1/HLA-DRB5/HLA-DMA/CD5/ITGA3/ICAM1/ZAP70/HLA-DRB1/JAK3/PDCD1LG2/SIRPG/CARD11/UNC13D/TNFSF14/HLA-DPA1/FOXP3/FOXA1/IFNG/EPHA4/TMIGD2/PTPRU/TGFB2/TNFSF18/HLA-DOB/DPP4/S100A10/HLA-DOA/HLA-DQA2/TGM2/IL4I1/IL12B/ITGA2/EBI3/TNFSF11/…	80
GO:0007159	leukocyte cell-cell adhesion	67/1322	371/18722	8.1848e-13	5.40094e-10	4.07409e-10	SELE/RAG1/EGR3/NR4A3/IL6/FOXJ1/IGF1/ADD2/JAM2/LRRC32/HLA-DQB1/B2M/ITGB7/HLA-A/HLA-DRA/CD40LG/PLA2G2D/SLAMF1/CCR2/RUNX1/HLA-DPB1/HLA-DRB5/HLA-DMA/LGALS9C/CD5/ICAM1/GPNMB/ZAP70/HLA-DRB1/JAK3/PDCD1LG2/SIRPG/TIGIT/CARD11/S100A8/CLEC4G/TNFSF14/CTLA4/HLA-DPA1/LGALS3/FOXP3/IFNG/TMIGD2/TNFSF18/CEACAM1/S100A9/HLA-DOB/LAG3/DPP4/HLA-DOA/HLA-DQA2/IL4I1/IL12B/LAX1/EBI3/TNFSF11/IL18/NT5E/TNFSF9/ELANE/CD55/CD70…	67
GO:0034765	regulation of ion transmembrane transport	79/1322	491/18722	3.75379e-12	2.2018e-09	1.66089e-09	NOS1/SCN3A/DRD1/KCNA2/RYR2/ARC/KCNB1/KCNJ13/PLP1/ATP1B2/ATP1A2/CLCNKB/KCNJ1/HAP1/SCN4B/KCNQ2/SHANK1/DPP6/BDKRB1/FHL1/KCNIP3/KCND3/KCNA1/HRC/PPARGC1A/RELN/PLN/CASQ2/CACNB2/TMEM38A/HCN2/KCNAB1/SLC43A1/CLCNKA/TRPM5/HECW2/ANK2/PDE4D/CACNA2D3/KCNA5/KCNE3/TRPC6/ABCB1/F2RL3/CACNA1C/KCNIP1/WNK2/HECW1/JPH2/RAMP3/CCR2/LIME1/P2RX1/CLIC5/FXYD2/GALR2/NETO1/HCN4/IFNG/HCN1/JPH3/HTR3A/CXCL9/CXCL10/CATSPER1/RGS4/…	79
GO:0042391	regulation of membrane potential	72/1322	434/18722	7.96203e-12	4.08994e-09	3.08516e-09	CUX2/CHRNA4/SCN3A/TAC1/MYOC/KCNA2/RYR2/TBX5/SLC26A3/KCNB1/ATP1B2/CHRM1/ATP1A2/GABRG1/SCN4B/SHANK1/SLC4A4/FHL1/MAPT/KCNK9/TRPC5/CHRNA2/KCND3/KCNA1/RELN/PLN/KDR/CASQ2/CACNB2/NPAS4/GJC1/GRIK4/CD36/BVES/HCN2/GABRR1/FZD9/GRIA1/CHRNA9/GABRD/ANK2/GABRB3/ATP1A3/KCNA5/CHRNB4/KCNE3/MPP2/GNA14/KCNK3/GABRA5/CACNA1C/CTNNA3/KCNK2/BCL2L1/IFI6/P2RX1/DSC2/NETO1/HCN4/HCN1/PMAIP1/HTR3A/GABRA1/RGS4/NALCN/KCNQ3/GRM5/…	72
GO:0050863	regulation of T cell activation	60/1322	329/18722	8.52232e-12	4.08994e-09	3.08516e-09	CYP26B1/RAG1/EGR3/SPINK5/IL6/LMO1/FOXJ1/IGF1/LRRC32/HLA-DQB1/SIT1/B2M/HLA-A/HLA-DRA/CD40LG/PLA2G2D/SLAMF1/CCR2/RUNX1/HLA-DPB1/HLA-DRB5/HLA-DMA/LGALS9C/CD5/GPNMB/ZAP70/HLA-DRB1/JAK3/PDCD1LG2/SIRPG/TIGIT/CARD11/CD2/ZNF683/CLEC4G/TNFSF14/CTLA4/HLA-DPA1/LGALS3/FOXP3/IFNG/TMIGD2/TNFSF18/CEACAM1/HLA-DOB/LAG3/DPP4/HLA-DOA/HLA-DQA2/IL4I1/IL12B/LAX1/EBI3/TNFSF11/IL18/TNFSF9/CD55/CD70/HLA-G/VTCN1	60
GO:0003018	vascular process in circulatory system	52/1322	263/18722	9.32831e-12	4.10368e-09	3.09552e-09	SLC5A5/NOS1/SLC6A17/DRD1/AGTR1/ATP1B2/ATP1A2/SLC2A4/AVPR1A/SH3GL2/EDNRB/SLC4A4/BDKRB2/PRKG1/PDE2A/GRIP2/ABCG2/SLCO1C1/CD36/PLVAP/AVPR2/CALCA/TBXA2R/SLC16A2/PDE3A/SLC1A1/KCNA5/KLF2/SMTNL2/ADRA1D/NPR1/SLC27A4/ABCC4/ABCB1/SLC38A3/SLC29A4/TEK/APOE/ACE/ITGA1/GPR4/CLDN5/ICAM1/P2RX1/HRH1/CEACAM1/CD38/ADRB3/C2CD4B/AZU1/C2CD4A/SLC6A20	52
GO:0042110	T cell activation	76/1322	487/18722	4.40888e-11	1.66246e-08	1.25404e-08	RAG2/KIT/CYP26B1/RAG1/EGR3/SPINK5/IL6/LMO1/WNT4/FOXJ1/IGF1/LRRC32/TREML2/HLA-DQB1/SIT1/B2M/HLA-A/HLA-DRA/CD40LG/CD3G/PLA2G2D/SLAMF1/CCR2/RUNX1/HLA-DPB1/HLA-DRB5/HLA-DMA/LGALS9C/CD5/ICAM1/GPNMB/SLA2/ZAP70/HLA-DRB1/JAK3/PDCD1LG2/SIRPG/KLRC1/CD7/TIGIT/CARD11/CD2/RSAD2/ZNF683/CLEC4G/TNFSF14/CTLA4/HLA-DPA1/LGALS3/FOXP3/IFNG/TMIGD2/CD3D/TNFSF18/CEACAM1/HLA-DOB/LAG3/DPP4/IL18R1/BATF/HLA-DOA/HLA-DQA2/IL4…	76
GO:0042060	wound healing	68/1322	422/18722	1.14717e-10	3.78494e-08	2.85509e-08	SCUBE1/SERPIND1/ODAM/DGKI/SLC4A1/PRKG1/KDR/HBB/DGKB/IL6/F10/NOG/SMOC2/CD36/PEAR1/WNT4/WNT3A/IGF1/TBXA2R/PF4/THBD/VWF/GP9/PRKCA/GATA2/FER1L5/NOTCH4/MMRN1/F2RL3/CD34/PDGFRB/APOE/GPR4/ARHGAP24/ADAMTS18/DST/CD40LG/ERBB3/PLAUR/MAP3K5/ANXA2/P2RX1/CLDN1/S100A8/ITGB6/PPL/TGFB2/PROS1/CEACAM1/PLAU/IL24/HPSE/SERPINA1/ITGA2/F5/GRHL3/LOX/INSL3/PROC/SERPINB2/MMP12/TFPI2/FN1/WNT7A/SAA1/EREG/ALOX5/SPRR3	68
GO:1903522	regulation of blood circulation	49/1322	256/18722	1.22778e-10	3.81263e-08	2.87598e-08	ATP2B3/NOS1/TAC1/RYR2/TBX5/MYL3/DES/AGTR1/ATP1B2/ATP1A2/AVPR1A/SCN4B/BDKRB2/KCND3/HRC/PLN/CASQ2/CACNB2/GJC1/ATP2B2/BVES/TMEM38A/AVPR2/CALCA/TBXA2R/ANK2/SLC1A1/ATP1A3/PDE4D/KCNA5/SMTNL2/TBX2/KCNE3/ADRA1D/HSPB7/CACNA1C/CTNNA3/ACE/CELF2/ICAM1/P2RX1/DSC2/HCN4/HRH1/TGFB2/CD38/RGS4/TH/NMU	49
GO:0050878	regulation of body fluid levels	62/1322	379/18722	4.11871e-10	1.14435e-07	8.63218e-08	SCUBE1/SERPIND1/TAC1/DGKI/CHRM1/CYP26B1/EDNRB/CORO2B/SLC4A1/PRKG1/HBB/DGKB/SLC6A3/IL6/F10/CD36/PEAR1/ERBB4/AVPR2/WNT3A/TBXA2R/PF4/THBD/VWF/GP9/PRKCA/NPR1/HSD11B2/MMRN1/F2RL3/CD34/APOE/AQP4/ADAMTS18/CD40LG/PLAUR/ANXA2/SCT/MET/P2RX1/CLDN1/KRT16/TIFAB/PROS1/CEACAM1/SCNN1A/PLAU/HPSE/SERPINA1/ITGA2/F5/GRHL3/PROC/SERPINB2/TFPI2/SFN/FN1/KCNN4/XDH/SAA1/ABCA12/CFTR	62
GO:0006936	muscle contraction	58/1322	347/18722	6.54858e-10	1.5748e-07	1.18792e-07	NOS1/RYR2/MYL3/DES/ATP1A2/KIT/EDNRB/SCN4B/BDKRB2/CKMT2/PRKG1/GRIP2/LMOD1/KCND3/KCNA1/HRC/PLN/HSPB6/CASQ2/MYH11/CACNB2/GJC1/SYNM/TMEM38A/TNNT3/MB/CALCA/TBXA2R/CNN1/CALCRL/MYLK2/ANK2/MYBPC1/PDE4D/KCNA5/TBX2/KCNE3/SGCA/MYOM1/MYOT/PGAM2/CACNA1C/CTNNA3/SMTN/MYOM3/PTGER3/P2RX1/GALR2/DSC2/TRIM63/HCN4/TIFAB/CD38/MYBPH/ITGA2/STAC/JSRP1/NMU	58
GO:0002399	MHC class II protein complex assembly	11/1322	16/18722	6.56291e-10	1.5748e-07	1.18792e-07	HLA-DQB1/B2M/HLA-DRA/HLA-DPB1/HLA-DRB5/HLA-DMA/HLA-DRB1/HLA-DPA1/HLA-DOB/HLA-DOA/HLA-DQA2	11
GO:0002503	peptide antigen assembly with MHC class II protein complex	11/1322	16/18722	6.56291e-10	1.5748e-07	1.18792e-07	HLA-DQB1/B2M/HLA-DRA/HLA-DPB1/HLA-DRB5/HLA-DMA/HLA-DRB1/HLA-DPA1/HLA-DOB/HLA-DOA/HLA-DQA2	11
GO:0019932	second-messenger-mediated signaling	54/1322	312/18722	6.99331e-10	1.60512e-07	1.21079e-07	NOS1/RYR2/AGTR1/ATP1A2/MAFA/SELE/PDE7B/AVPR1A/EDNRB/ADCY1/RNF157/MAPT/PRKG1/PDE2A/PDE10A/HRC/PLN/EPHA5/KDR/CASQ2/RCAN2/RAPGEF4/CD36/TMEM38A/IGF1/TBXA2R/TRPM5/PDE3A/ANK2/GNAI1/PDE4D/EFHB/ADCYAP1R1/GLP1R/NPR1/ITPR1/CHP2/APOE/CACNA1C/CDH13/CCR2/ADCY2/SCT/CCR8/SLA2/ZAP70/HRH1/TRPM8/TNFSF11/INSL3/GRM5/CCR9/AZU1/CCL20	54
GO:0007188	adenylate cyclase-modulating G protein-coupled receptor signaling pathway	44/1322	233/18722	1.67764e-09	3.69012e-07	2.78356e-07	DRD1/GALR1/CHRM1/RXFP1/ADM2/VIPR1/ADCY1/PDE2A/PLN/AVPR2/ADCY5/CALCA/TBXA2R/CALCRL/LHCGR/PF4/GNAI1/PDE4D/GPR37L1/ADCYAP1R1/PRKCA/GLP1R/ADRA1D/GNA14/HTR1F/GPR3/CALCB/RAMP3/GPR4/PTGER3/ADCY2/PTGER1/GALR2/MARCO/PTH2R/CXCL9/CXCL10/INSL3/ADRB3/ADCY8/GRM5/CXCL11/GPR12/CNR1	44
GO:0050890	cognition	51/1322	296/18722	2.43838e-09	4.95084e-07	3.73456e-07	CUX2/CHRNA4/DRD1/TAC1/CSMD1/ARC/CNTNAP2/CHRM1/ATP1A2/SLC2A4/KIT/CCL11/SHANK1/ADCY1/MAPT/RAG1/RELN/NPAS4/EGR2/NRXN2/FZD9/GRIA1/CNTN2/LHCGR/SLC1A1/MAP1A/GABRA5/APOE/KCNK2/LMX1A/CLDN5/B2M/HLA-DRA/PTCHD1/ITGA3/LDLR/GALR2/NETO1/STRA6/TIFAB/HRH1/JPH3/KLK8/LRRN4/MGAT3/ADCY8/GRM5/PRKCG/TH/MME/CNR1	51
GO:0050808	synapse organization	65/1322	426/18722	2.91181e-09	5.69312e-07	4.29449e-07	CUX2/KIF1A/DRD1/BCAN/SDK2/ARC/LINGO2/LGI2/LRFN2/LRTM2/SHANK1/SPARCL1/MAPT/NFASC/CNTN5/RELN/CACNB2/NPAS4/SNCB/ERBB4/WNT3A/CLSTN2/NRXN2/SLITRK5/FZD9/CNTN2/LRRTM1/GPM6A/SLC1A1/GABRB3/ADD2/SYBU/CTNNA2/MYOT/CDH2/CBLN2/ARHGEF15/CDH8/SLITRK3/NEFL/APOE/LRRC4B/LMX1A/EPHB1/SPTBN2/DOK7/ITGA3/C3/EPHB3/PCDH8/NGEF/EPHA4/SNCG/KIRREL3/DLGAP3/KLK8/IL1RAPL2/CNKSR2/GABRA1/SPOCK2/GRM5/CBLN1/ACTBL2/WNT7A/GAP43	65
GO:0050729	positive regulation of inflammatory response	32/1322	142/18722	3.28367e-09	6.0438e-07	4.55902e-07	TAC1/AGTR1/FABP4/PLA2G3/NPY5R/PDE2A/IL6/SUCNR1/NUPR1/GPR4/PTGER3/CCR2/LDLR/CTSC/S100A8/C3/IFNG/TNFSF18/S100A9/LTA/TGM2/IL12B/ITGA2/TNFSF11/IL18/ZBP1/IL1RL1/CCL1/C2CD4B/CNR1/C2CD4A/LBP	32
