# Supplementary material for: Transcriptomic landscape of TIMP3 oncosuppressor activity in thyroid carcinoma
Source: Cancer Cell Int. 2022 Dec 12;22:400. doi: 10.1186/s12935-022-02811-8 (PMC9743531; doi:10.1186/s12935-022-02811-8)
Supplement: Supplementary file 7 — Additional file 7: Table S6. KEGG functional enriched terms in IV versus I TIMP3 quartile. Details of the top 25 significantly enriched KEGG gene sets in TIMP3-high versus TIMP3-low TCGA cases by cluster Profiler analysis on 1660 differentially expressed genes with at least 2 absolute FC. [file 12935_2022_2811_MOESM7_ESM.xlsx]

## Sheet: Foglio1
ID	Description	GeneRatio	BgRatio	pvalue	p.adjust	qvalue	geneID	Count
hsa04060	Cytokine-cytokine receptor interaction	64/703	295/8146	1.81938e-12	4.71355e-10	3.48915e-10	1440/353500/2662/3626/3977/6356/1271/653/151449/3569/5196/6358/3598/2690/50615/959/729230/6374/1237/392255/8200/3568/3561/7850/8740/4050/10913/3604/3458/1437/2919/7042/8995/9518/4049/11009/4283/8809/6367/26525/3557/3627/3593/6361/10148/8600/3606/6357/8784/608/6373/64109/9173/56300/8744/27189/10803/6346/970/284340/6354/6364/133396/27178	64
hsa04640	Hematopoietic cell lineage	33/703	99/8146	3.041e-12	4.71355e-10	3.48915e-10	1440/1791/3815/3569/948/2815/4254/947/3672/3119/3122/917/3115/3127/3108/921/3675/3123/924/914/3568/7850/3113/1437/915/952/3112/3111/3118/3673/910/4311/1604	33
hsa04080	Neuroactive ligand-receptor interaction	71/703	362/8146	1.71742e-11	1.77466e-09	1.31367e-09	5539/7425/1137/1812/6863/5540/185/2587/1128/59350/552/79924/2565/5697/1910/7433/84109/4889/2862/2891/623/624/80763/5179/1135/2900/4852/554/6751/796/6915/2569/2890/55584/10203/3973/2563/2562/1143/117/2740/146/4828/887/9002/3355/2558/286530/797/4922/2690/5733/27334/5731/6343/5023/8811/718/3269/130576/5746/5173/2554/5368/5031/3640/155/2915/6750/1268/10874	71
hsa04514	Cell adhesion molecules	39/703	149/8146	1.44354e-10	1.11874e-08	8.28134e-09	26047/6401/23114/9379/6900/8516/58494/4684/257194/1000/947/94030/7122/3119/3695/3105/3122/959/4685/3134/3115/3127/3108/3383/3123/80380/9076/201633/914/3106/1493/3113/9071/3112/3111/3118/10686/3135/79679	39
hsa05332	Graft-versus-host disease	18/703	42/8146	2.77873e-09	1.72281e-07	1.27529e-07	3569/3119/3812/3105/3122/3134/3115/3127/3108/3123/3821/3106/3113/3458/3112/3111/3118/3135	18
hsa05330	Allograft rejection	17/703	38/8146	3.44906e-09	1.78201e-07	1.31911e-07	3119/3105/3122/959/3134/3115/3127/3108/3123/3106/3113/3458/3112/3111/3118/3593/3135	17
hsa04020	Calcium signaling pathway	48/703	240/8146	2.02516e-08	8.96855e-07	6.63886e-07	492/4842/1812/6262/185/1128/552/1910/107/623/624/2321/3270/5350/80310/5153/3791/845/2324/491/2066/6915/3973/85366/815/1950/5578/146/9630/887/3708/5159/775/5733/2277/2065/108/5731/4233/5023/4486/3269/952/155/114/2915/5582/9965	48
hsa04940	Type I diabetes mellitus	17/703	43/8146	3.33791e-08	1.29344e-06	9.57454e-07	3119/3105/3122/3134/3115/3127/3108/3123/3106/3113/3458/4049/3112/3111/3118/3593/3135	17
hsa05323	Rheumatoid arthritis	26/703	93/8146	4.09726e-08	1.41128e-06	1.04468e-06	2321/3569/155066/7010/3119/3122/3115/3127/3108/6374/3383/4312/3123/1493/3113/4050/3458/1437/2919/7042/3112/3111/3118/8600/3606/6364	26
hsa04610	Complement and coagulation cascades	24/703	85/8146	1.1087e-07	3.43697e-06	2.54417e-06	3053/731/5104/623/732/624/5648/2159/7056/7450/9002/5329/10878/718/3075/5627/5328/5265/2153/5624/5055/629/1604/3078	24
hsa05320	Autoimmune thyroid disease	18/703	53/8146	2.04144e-07	5.75315e-06	4.2587e-06	7173/7038/3119/3105/3122/959/3134/3115/3127/3108/3123/3106/1493/3113/3112/3111/3118/3135	18
hsa05321	Inflammatory bowel disease	20/703	65/8146	2.73922e-07	7.07633e-06	5.23817e-06	3569/3119/50615/3122/6772/3115/3127/3108/3123/3561/3113/50943/3458/7042/3112/8809/3111/3118/3593/3606	20
hsa04612	Antigen processing and presentation	22/703	78/8146	3.83077e-07	9.13492e-06	6.76202e-06	6890/3119/567/3812/3105/3122/3134/3115/3127/3108/3123/3821/4261/3106/3113/3458/3823/3822/3112/3111/3118/3135	22
hsa04970	Salivary secretion	24/703	92/8146	5.59083e-07	1.23797e-05	9.16392e-06	492/4842/482/477/107/5592/820/491/111/478/5578/146/3708/108/486/4069/952/155/114/5582/3783/1473/1472/1470	24
hsa05310	Asthma	13/703	31/8146	6.29161e-07	1.30027e-05	9.62506e-06	6356/3119/3122/959/3115/3127/3108/3123/3113/6037/3112/3111/3118	13
hsa04061	Viral protein interaction with cytokine and cytokine receptor	25/703	100/8146	7.78984e-07	1.50928e-05	1.11723e-05	6356/3569/5196/6358/729230/6374/1237/3561/8740/2919/4049/11009/4283/8809/6367/3627/6361/3606/6357/6373/10803/6346/6354/6364/27178	25
hsa04512	ECM-receptor interaction	23/703	88/8146	9.27368e-07	1.69108e-05	1.2518e-05	1299/63923/7060/1297/1758/5649/22798/8515/948/10319/1288/7450/2815/8516/3672/3695/3675/3914/3694/3691/3673/2335/256076	23
hsa04971	Gastric acid secretion	21/703	76/8146	1.02336e-06	1.76245e-05	1.30463e-05	482/477/3758/107/495/111/760/115111/85366/815/2770/478/5578/887/3708/3776/108/114/5582/6750/1080	21
hsa04972	Pancreatic secretion	25/703	102/8146	1.16078e-06	1.89391e-05	1.40194e-05	492/6262/1811/482/477/50487/107/8671/491/111/760/478/5578/3708/1359/26279/108/6343/8399/486/952/114/5582/5874/1080	25
hsa05414	Dilated cardiomyopathy	24/703	96/8146	1.29379e-06	1.91172e-05	1.41513e-05	6262/4634/1674/107/5350/8515/783/111/3479/55799/8516/6442/775/3672/3695/108/3675/3694/3691/7042/3673/786/114/27092	24
hsa05412	Arrhythmogenic right ventricular cardiomyopathy	21/703	77/8146	1.29504e-06	1.91172e-05	1.41513e-05	6262/1674/8515/783/55799/8516/1496/6442/1000/83439/775/29119/3672/3695/3675/1824/3694/3691/3673/786/27092	21
hsa05416	Viral myocarditis	18/703	60/8146	1.63855e-06	2.29989e-05	1.70247e-05	6442/3119/3105/3122/959/3134/3115/3127/3108/3383/3123/3106/3113/3112/3111/3118/1604/3135	18
hsa04672	Intestinal immune network for IgA production	16/703	49/8146	1.77524e-06	2.29989e-05	1.70247e-05	3569/3119/3695/3122/959/3115/3127/3108/3123/3113/3112/3111/3118/5284/608/10803	16
hsa04024	cAMP signaling pathway	41/703	221/8146	1.78056e-06	2.29989e-05	1.70247e-05	492/1812/6262/482/1128/477/107/2891/10846/5350/11069/491/4852/56670/610/6751/111/2890/3973/5139/815/2770/478/5144/117/2740/4881/10257/3355/775/5733/108/486/10021/338442/8843/27198/5143/114/6750/1080	41
hsa05145	Toxoplasmosis	25/703	112/8146	7.13918e-06	8.85259e-05	6.55302e-05	22798/10319/2770/3119/598/3122/959/6772/3115/3127/3108/3914/3949/3123/4261/3113/3458/79444/7042/3112/330/3111/3118/3593/240	25
