# Supplementary material for: Transcriptomic landscape of TIMP3 oncosuppressor activity in thyroid carcinoma
Source: Cancer Cell Int. 2022 Dec 12;22:400. doi: 10.1186/s12935-022-02811-8 (PMC9743531; doi:10.1186/s12935-022-02811-8)
Supplement: Supplementary file 8 — Additional file 8: Table S7. Hallmark gene sets significantly enriched in NIM1-T23 versus NIM1-EV clones. Gene sets were selected on nominal p-value < 0.05 and FDR q-value < 5%. Size and Normalized Enrichment Score (NES) are also reported for each gene set. Gene sets are ordered according to NES. Red asterisk indicate Hallmark gene sets significantly enriched also in IV versus I TIMP3 tumors quartiles. [file 12935_2022_2811_MOESM8_ESM.xlsx]

## Sheet: Foglio1
NAME	SIZE	NES	NOM p-val	FDR q-val
HALLMARK_E2F_TARGETS*	199	-2.4317	0	0
HALLMARK_G2M_CHECKPOINT*	200	-2.4156	0	0
HALLMARK_MYC_TARGETS_V1	193	-2.03917	0	0
HALLMARK_UNFOLDED_PROTEIN_RESPONSE	110	-1.97334	0	0
HALLMARK_TNFA_SIGNALING_VIA_NFKB*	196	-1.91733	0	0.000365217
HALLMARK_REACTIVE_OXYGEN_SPECIES_PATHWAY	46	-1.80786	0	0.00188278
HALLMARK_MITOTIC_SPINDLE	198	-1.76118	0	0.00346284
HALLMARK_MTORC1_SIGNALING	196	-1.74421	0	0.00401897
HALLMARK_UV_RESPONSE_UP	155	-1.69721	0	0.00835374
HALLMARK_HYPOXIA	197	-1.68848	0	0.0080885
HALLMARK_MYC_TARGETS_V2	56	-1.57	0.0127877	0.0193664
HALLMARK_GLYCOLYSIS	197	-1.55324	0	0.0200285
HALLMARK_IL2_STAT5_SIGNALING*	197	-1.55025	0	0.0188827
HALLMARK_WNT_BETA_CATENIN_SIGNALING	41	-1.51657	0.0167064	0.0256921
HALLMARK_SPERMATOGENESIS	133	-1.46546	0.00986842	0.038461
HALLMARK_ESTROGEN_RESPONSE_LATE	196	-1.46451	0	0.0363429
HALLMARK_HEME_METABOLISM	195	-1.44774	0.0113636	0.0412076
