# Supplementary material for: Transcriptomic landscape of TIMP3 oncosuppressor activity in thyroid carcinoma
Source: Cancer Cell Int. 2022 Dec 12;22:400. doi: 10.1186/s12935-022-02811-8 (PMC9743531; doi:10.1186/s12935-022-02811-8)
Supplement: Supplementary file 9 — Additional file 9: Table S8. Supervised gene expression analysis results in NIM1-T23 versus NIM1-EV clones. List of 290 differentially expressed genes in NIM1-T23 (expressing a high level of TIMP3 protein) and NIM1-EV (control empty vector) triplicates by Rank product at PFP < 1% and FC > 2 or < − 2. Up- and down-regulated genes are ordered according to absolute value of FC. [file 12935_2022_2811_MOESM9_ESM.xlsx]

## Sheet: TOT-GENE-LIST
GENE	FC (class2 vs 1)	pfp	P.value	GEP
LOC102724188	78.125	0	0	UP TIMP3 vs CTR
RTL1	48.5437	0	0	UP TIMP3 vs CTR
LSAMP	21.645	0	0	UP TIMP3 vs CTR
TIMP3	20.6612	0	0	UP TIMP3 vs CTR
HTN3	18.7617	0	0	UP TIMP3 vs CTR
LOC100505817	16.6113	0	0	UP TIMP3 vs CTR
TLL2	12.0482	0	0	UP TIMP3 vs CTR
ABCA1	10.2249	0	0	UP TIMP3 vs CTR
HAS2	9.12409	0	0	UP TIMP3 vs CTR
FOXC2	7.52445	0	0	UP TIMP3 vs CTR
VSNL1	6.92521	0	0	UP TIMP3 vs CTR
ANKRD30B	5.89623	0	0	UP TIMP3 vs CTR
PRUNE2	5.52792	0	0	UP TIMP3 vs CTR
SNORD114-28	5.35619	0	0	UP TIMP3 vs CTR
MIR433	5.16262	0	0	UP TIMP3 vs CTR
LINC00312	4.914	0	0	UP TIMP3 vs CTR
SGK1	4.87567	0	0	UP TIMP3 vs CTR
VCAN	4.68823	0	0	UP TIMP3 vs CTR
GPNMB	4.65116	0	0	UP TIMP3 vs CTR
GJA1	4.5977	0	0	UP TIMP3 vs CTR
HTN1	4.4843	0	0	UP TIMP3 vs CTR
ERVV-2	4.4603	0	0	UP TIMP3 vs CTR
POTED	4.34783	0	0	UP TIMP3 vs CTR
MMP2	4.23729	0	0	UP TIMP3 vs CTR
F2R	4.07664	0	0	UP TIMP3 vs CTR
NEDD9	3.9604	0	0	UP TIMP3 vs CTR
SORCS1	3.92773	0	0	UP TIMP3 vs CTR
HBEGF	3.59066	0	0	UP TIMP3 vs CTR
MFAP5	3.56506	0.0003	0	UP TIMP3 vs CTR
ST8SIA4	3.56506	0.0003	0	UP TIMP3 vs CTR
DYDC2	3.53107	0.0003	0	UP TIMP3 vs CTR
IL17RD	3.52609	0.0003	0	UP TIMP3 vs CTR
ADAMTS1	3.51741	0.0003	0	UP TIMP3 vs CTR
LOC101927501	3.4662	0.0003	0	UP TIMP3 vs CTR
SPP1	3.35233	0.0003	0	UP TIMP3 vs CTR
MUC15	3.35008	0.0003	0	UP TIMP3 vs CTR
MIR1284	3.26797	0.0009	0	UP TIMP3 vs CTR
AKAP6	3.26584	0.0003	0	UP TIMP3 vs CTR
CPA4	3.25627	0.0003	0	UP TIMP3 vs CTR
LMCD1	3.25521	0.0003	0	UP TIMP3 vs CTR
ZBED2	3.10752	0.0012	0	UP TIMP3 vs CTR
TMEM133	3.10559	0.0007	0	UP TIMP3 vs CTR
F2RL1	3.05998	0.0007	0	UP TIMP3 vs CTR
IGFBP7	3.05157	0.0008	0	UP TIMP3 vs CTR
LOC100288798	3.05064	0.0012	0	UP TIMP3 vs CTR
MIR136	3.03214	0.0007	0	UP TIMP3 vs CTR
CNNM1	3.02847	0.0007	0	UP TIMP3 vs CTR
ABHD3	3.02663	0.0012	0	UP TIMP3 vs CTR
LINC01204	3.02206	0.0009	0	UP TIMP3 vs CTR
SFTA3	3.00933	0.0011	0	UP TIMP3 vs CTR
WSCD1	2.9967	0.0007	0	UP TIMP3 vs CTR
MITF	2.99222	0.0011	0	UP TIMP3 vs CTR
MIR432	2.97	0.0012	0	UP TIMP3 vs CTR
MIR548H3	2.94898	0.0017	0	UP TIMP3 vs CTR
LOC102467222	2.92826	0.0011	0	UP TIMP3 vs CTR
GPER1	2.90782	0.0012	0	UP TIMP3 vs CTR
FMNL2	2.89939	0.0012	0	UP TIMP3 vs CTR
COL8A1	2.89101	0.0012	0	UP TIMP3 vs CTR
LPAR5	2.85307	0.0013	0	UP TIMP3 vs CTR
LOC100507487	2.84819	0.0016	0	UP TIMP3 vs CTR
CD5L	2.84738	0.0013	0	UP TIMP3 vs CTR
LHX1	2.84738	0.0014	0	UP TIMP3 vs CTR
PSG1	2.84414	0.0016	0	UP TIMP3 vs CTR
ACSL5	2.83849	0.0014	0	UP TIMP3 vs CTR
FAM155A-IT1	2.83126	0.0016	0	UP TIMP3 vs CTR
MIR604	2.8169	0.0016	0	UP TIMP3 vs CTR
SNORD114-21	2.79564	0.0016	0	UP TIMP3 vs CTR
LOC645949	2.75862	0.0016	0	UP TIMP3 vs CTR
LINC00704	2.74952	0.0017	0	UP TIMP3 vs CTR
GPR183	2.74123	0.0016	0	UP TIMP3 vs CTR
CADM1	2.69906	0.0015	0	UP TIMP3 vs CTR
STATH	2.69687	0.0019	0	UP TIMP3 vs CTR
NFKBIZ	2.65604	0.0023	0	UP TIMP3 vs CTR
TOX	2.63435	0.0016	0	UP TIMP3 vs CTR
C7orf31	2.61986	0.0017	0	UP TIMP3 vs CTR
PDK4	2.60417	0.0053	0	UP TIMP3 vs CTR
RMST	2.58933	0.0045	0	UP TIMP3 vs CTR
SORBS2	2.58665	0.0021	0	UP TIMP3 vs CTR
MMP1	2.58465	0.0021	0	UP TIMP3 vs CTR
CTB-7E3.1	2.55754	0.0037	0	UP TIMP3 vs CTR
LOC283352	2.55428	0.0026	0	UP TIMP3 vs CTR
MIR431	2.54065	0.0029	0	UP TIMP3 vs CTR
CYP2E1	2.53421	0.0033	0	UP TIMP3 vs CTR
LURAP1L	2.51636	0.003	0	UP TIMP3 vs CTR
FBN1	2.50815	0.003	0	UP TIMP3 vs CTR
ABI3BP	2.48509	0.0033	0	UP TIMP3 vs CTR
PAG1	2.47893	0.003	0	UP TIMP3 vs CTR
MDK	2.46731	0.003	0	UP TIMP3 vs CTR
PPM1H	2.45942	0.0033	0	UP TIMP3 vs CTR
MARCH3	2.457	0.003	0	UP TIMP3 vs CTR
LINC01203	2.45339	0.0037	0	UP TIMP3 vs CTR
LOC105369187	2.45339	0.0038	0	UP TIMP3 vs CTR
LOC101929771	2.42895	0.0033	0	UP TIMP3 vs CTR
GS1-600G8.3	2.41955	0.0038	0	UP TIMP3 vs CTR
FAM26E	2.41721	0.007	0	UP TIMP3 vs CTR
ANKRD1	2.40964	0.0037	0	UP TIMP3 vs CTR
ZNF117	2.39292	0.0057	0	UP TIMP3 vs CTR
DSEL	2.38493	0.0038	0	UP TIMP3 vs CTR
EHD2	2.37304	0.0039	0	UP TIMP3 vs CTR
TP53INP1	2.37079	0.0038	0	UP TIMP3 vs CTR
AHNAK2	2.35239	0.0041	0	UP TIMP3 vs CTR
FOXL1	2.35183	0.0036	0	UP TIMP3 vs CTR
HMGCS1	2.34632	0.0061	0	UP TIMP3 vs CTR
LOC102723766	2.34137	0.0038	0	UP TIMP3 vs CTR
PLEKHM1P	2.33809	0.005	0	UP TIMP3 vs CTR
LUM	2.3175	0.0051	0	UP TIMP3 vs CTR
LOC401585	2.30521	0.0054	0	UP TIMP3 vs CTR
CPEB2	2.30468	0.0039	0	UP TIMP3 vs CTR
ARHGAP42	2.29779	0.005	0	UP TIMP3 vs CTR
LINC00664	2.2941	0.004	0	UP TIMP3 vs CTR
FRMD5	2.29305	0.005	0	UP TIMP3 vs CTR
SLC16A12	2.28781	0.0046	0	UP TIMP3 vs CTR
EDIL3	2.27687	0.0087	0.0001	UP TIMP3 vs CTR
CTSO	2.27169	0.0046	0	UP TIMP3 vs CTR
SLC44A1	2.26655	0.005	0	UP TIMP3 vs CTR
LRRC37A3	2.26398	0.0053	0	UP TIMP3 vs CTR
LOC146880	2.26142	0.0046	0	UP TIMP3 vs CTR
GAS1	2.26091	0.0053	0	UP TIMP3 vs CTR
KCNMA1	2.25225	0.0054	0	UP TIMP3 vs CTR
LINC01087	2.24972	0.0069	0	UP TIMP3 vs CTR
LOC100507065	2.24972	0.0085	0	UP TIMP3 vs CTR
PLAT	2.24871	0.007	0	UP TIMP3 vs CTR
MIR127	2.24165	0.0054	0	UP TIMP3 vs CTR
TNFAIP3	2.23964	0.0071	0	UP TIMP3 vs CTR
SCN9A	2.23614	0.0085	0	UP TIMP3 vs CTR
STC2	2.23514	0.0057	0	UP TIMP3 vs CTR
AMIGO2	2.22618	0.0061	0	UP TIMP3 vs CTR
SERTAD4	2.22618	0.0078	0	UP TIMP3 vs CTR
OIT3	2.22519	0.0061	0	UP TIMP3 vs CTR
ROBO2	2.21337	0.0078	0	UP TIMP3 vs CTR
LOC403323	2.20897	0.0077	0	UP TIMP3 vs CTR
ZNF320	2.18245	0.0077	0	UP TIMP3 vs CTR
PPAPDC1A	2.16591	0.0073	0	UP TIMP3 vs CTR
SETBP1	2.16544	0.0078	0	UP TIMP3 vs CTR
ZFPM2-AS1	2.16029	0.0094	0.0001	UP TIMP3 vs CTR
HSF2BP	2.1561	0.0081	0	UP TIMP3 vs CTR
LOC105376351	2.15517	0.007	0	UP TIMP3 vs CTR
SULT1E1	2.14961	0.0095	0.0001	UP TIMP3 vs CTR
SAMD15	2.14684	0.0085	0	UP TIMP3 vs CTR
NEXN	2.14546	0.0082	0	UP TIMP3 vs CTR
KCNQ5-IT1	2.14454	0.0076	0	UP TIMP3 vs CTR
GABRG3	2.14316	0.0081	0	UP TIMP3 vs CTR
NKX2-1	2.14133	0.0086	0	UP TIMP3 vs CTR
LINC00520	2.13675	0.009	0.0001	UP TIMP3 vs CTR
MIR548V	2.13356	0.0093	0.0001	UP TIMP3 vs CTR
SLC14A2	2.13265	0.0081	0	UP TIMP3 vs CTR
SVIL	2.12314	0.009	0.0001	UP TIMP3 vs CTR
PACS1	2.12179	0.0092	0.0001	UP TIMP3 vs CTR
THSD4	2.11238	0.009	0.0001	UP TIMP3 vs CTR
EDNRA	2.10393	0.0086	0	UP TIMP3 vs CTR
RDH10	2.09336	0.0097	0.0001	UP TIMP3 vs CTR
LIPG	2.08943	0.0096	0.0001	UP TIMP3 vs CTR
MAP3K9	2.08768	0.0094	0.0001	UP TIMP3 vs CTR
HOXD10	2.08551	0.009	0.0001	UP TIMP3 vs CTR
B3GNT5	2.07943	0.0096	0.0001	UP TIMP3 vs CTR
TMEM132D	2.07771	0.0095	0.0001	UP TIMP3 vs CTR
TMEM216	2.06271	0.0096	0.0001	UP TIMP3 vs CTR
EGR1	-11.9167	0	0	DW TIMP3 vs CTR
LINC01419	-11.3407	0	0	DW TIMP3 vs CTR
LINC00707	-7.6403	0	0	DW TIMP3 vs CTR
MT1A	-7.2468	0	0	DW TIMP3 vs CTR
IL24	-6.8124	0	0	DW TIMP3 vs CTR
NR4A2	-6.1568	0	0	DW TIMP3 vs CTR
PCDHB6	-5.0145	0	0	DW TIMP3 vs CTR
LINC01551	-4.589	0	0	DW TIMP3 vs CTR
PDLIM1	-4.5811	0	0	DW TIMP3 vs CTR
TENM3	-4.4949	0	0	DW TIMP3 vs CTR
LOC102723780	-4.4948	0	0	DW TIMP3 vs CTR
RUNDC3A-AS1	-4.0045	0	0	DW TIMP3 vs CTR
FSTL5	-3.9389	0	0	DW TIMP3 vs CTR
MARCH4	-3.8691	0	0	DW TIMP3 vs CTR
MAGEB10	-3.8677	0	0	DW TIMP3 vs CTR
CCL2	-3.7998	0	0	DW TIMP3 vs CTR
NR4A3	-3.649	0	0	DW TIMP3 vs CTR
PCDHB17P	-3.6442	0	0	DW TIMP3 vs CTR
NDNF	-3.6315	0	0	DW TIMP3 vs CTR
CCBE1	-3.63	0	0	DW TIMP3 vs CTR
TXNIP	-3.6208	0	0	DW TIMP3 vs CTR
TFAP2C	-3.6023	0	0	DW TIMP3 vs CTR
RARB	-3.576	0	0	DW TIMP3 vs CTR
EPHA3	-3.5573	0	0	DW TIMP3 vs CTR
AOX1	-3.5426	0	0	DW TIMP3 vs CTR
IL11	-3.5386	0	0	DW TIMP3 vs CTR
PCDHB8	-3.522	0	0	DW TIMP3 vs CTR
AADACP1	-3.4598	0.0004	0	DW TIMP3 vs CTR
ARHGAP15	-3.4582	0.0003	0	DW TIMP3 vs CTR
FAM24B	-3.2032	0.0003	0	DW TIMP3 vs CTR
NNMT	-3.1467	0.0003	0	DW TIMP3 vs CTR
ST3GAL1	-3.1285	0.0003	0	DW TIMP3 vs CTR
FOS	-3.0358	0.0003	0	DW TIMP3 vs CTR
BEX1	-3.0076	0.0003	0	DW TIMP3 vs CTR
NOS1	-2.9191	0.0003	0	DW TIMP3 vs CTR
NEFL	-2.9066	0.0003	0	DW TIMP3 vs CTR
MEIS3P1	-2.8597	0.0002	0	DW TIMP3 vs CTR
TMEM158	-2.8398	0.0008	0	DW TIMP3 vs CTR
TM4SF1	-2.8255	0.0003	0	DW TIMP3 vs CTR
LINC01602	-2.7703	0.0002	0	DW TIMP3 vs CTR
SHISA9	-2.7681	0.0002	0	DW TIMP3 vs CTR
MCTP2	-2.7638	0.0003	0	DW TIMP3 vs CTR
ENPP1	-2.7594	0.0003	0	DW TIMP3 vs CTR
LOC729987	-2.7567	0.0006	0	DW TIMP3 vs CTR
CXCL8	-2.7226	0.0002	0	DW TIMP3 vs CTR
CLMN	-2.6878	0.0002	0	DW TIMP3 vs CTR
SRGN	-2.669	0.0002	0	DW TIMP3 vs CTR
LAMB3	-2.6246	0.0008	0	DW TIMP3 vs CTR
SERPINE1	-2.6242	0.0008	0	DW TIMP3 vs CTR
RFPL4AL1	-2.5889	0.0004	0	DW TIMP3 vs CTR
KCNIP3	-2.4849	0.0019	0	DW TIMP3 vs CTR
FAM72C	-2.48	0.0028	0	DW TIMP3 vs CTR
IL1A	-2.4647	0.0031	0	DW TIMP3 vs CTR
SEMA3C	-2.4518	0.0022	0	DW TIMP3 vs CTR
CNKSR2	-2.4367	0.0016	0	DW TIMP3 vs CTR
TSPAN7	-2.4219	0.0022	0	DW TIMP3 vs CTR
TSPAN2	-2.4122	0.0019	0	DW TIMP3 vs CTR
MIR4461	-2.4088	0.0031	0	DW TIMP3 vs CTR
PXDN	-2.4034	0.0027	0	DW TIMP3 vs CTR
MGAT4A	-2.3899	0.0021	0	DW TIMP3 vs CTR
FLG	-2.3871	0.0028	0	DW TIMP3 vs CTR
THRB	-2.3862	0.0023	0	DW TIMP3 vs CTR
STC1	-2.3826	0.0029	0	DW TIMP3 vs CTR
KYNU	-2.3795	0.0021	0	DW TIMP3 vs CTR
ANO2	-2.3731	0.0022	0	DW TIMP3 vs CTR
SERPINA5	-2.366	0.0022	0	DW TIMP3 vs CTR
DDIT4	-2.3615	0.0028	0	DW TIMP3 vs CTR
FLJ26245	-2.3544	0.0022	0	DW TIMP3 vs CTR
GALC	-2.3381	0.0021	0	DW TIMP3 vs CTR
AADAC	-2.3329	0.003	0	DW TIMP3 vs CTR
ITGB8	-2.3214	0.0029	0	DW TIMP3 vs CTR
ADAMTS6	-2.315	0.0027	0	DW TIMP3 vs CTR
HEG1	-2.3139	0.0028	0	DW TIMP3 vs CTR
MAGEC2	-2.3124	0.0027	0	DW TIMP3 vs CTR
PPP4R3CP	-2.3124	0.0027	0	DW TIMP3 vs CTR
DMBT1	-2.3072	0.0028	0	DW TIMP3 vs CTR
LINC00173	-2.2943	0.0029	0	DW TIMP3 vs CTR
EPAS1	-2.289	0.0026	0	DW TIMP3 vs CTR
LINC00473	-2.2697	0.0031	0	DW TIMP3 vs CTR
TRABD2A	-2.2662	0.0029	0	DW TIMP3 vs CTR
NMNAT2	-2.2546	0.0028	0	DW TIMP3 vs CTR
CA9	-2.2539	0.003	0	DW TIMP3 vs CTR
TRIB2	-2.2454	0.0031	0	DW TIMP3 vs CTR
SLC1A3	-2.2393	0.0036	0	DW TIMP3 vs CTR
GABRA3	-2.2375	0.0028	0	DW TIMP3 vs CTR
SMOX	-2.2368	0.0031	0	DW TIMP3 vs CTR
PPP2R2C	-2.2264	0.0032	0	DW TIMP3 vs CTR
FLI1	-2.2242	0.0032	0	DW TIMP3 vs CTR
PTPN22	-2.2237	0.0032	0	DW TIMP3 vs CTR
RNASE4	-2.2123	0.003	0	DW TIMP3 vs CTR
SERPINB7	-2.206	0.003	0	DW TIMP3 vs CTR
PRKD1	-2.1884	0.0031	0	DW TIMP3 vs CTR
GRAMD1B	-2.1882	0.003	0	DW TIMP3 vs CTR
HES1	-2.1641	0.0063	0	DW TIMP3 vs CTR
NR4A1	-2.1575	0.0035	0	DW TIMP3 vs CTR
LOC101928208	-2.1542	0.0041	0	DW TIMP3 vs CTR
FAM196B	-2.154	0.0061	0	DW TIMP3 vs CTR
UACA	-2.1506	0.0038	0	DW TIMP3 vs CTR
HSPA1B	-2.1464	0.004	0	DW TIMP3 vs CTR
GPR65	-2.1444	0.004	0	DW TIMP3 vs CTR
KLF9	-2.1394	0.004	0	DW TIMP3 vs CTR
PRTFDC1	-2.124	0.0038	0	DW TIMP3 vs CTR
CXCR4	-2.1175	0.0041	0	DW TIMP3 vs CTR
WDR66	-2.1152	0.0063	0	DW TIMP3 vs CTR
AURKA	-2.1129	0.0048	0	DW TIMP3 vs CTR
TIMP4	-2.1109	0.0076	0	DW TIMP3 vs CTR
PPP4R4	-2.1078	0.0041	0	DW TIMP3 vs CTR
SLIT2	-2.1075	0.0043	0	DW TIMP3 vs CTR
PTPRD	-2.1004	0.0054	0	DW TIMP3 vs CTR
ZNF185	-2.0876	0.0061	0	DW TIMP3 vs CTR
CALB2	-2.0842	0.006	0	DW TIMP3 vs CTR
ACAA2	-2.0788	0.006	0	DW TIMP3 vs CTR
BASP1	-2.0751	0.006	0	DW TIMP3 vs CTR
FABP6	-2.0737	0.006	0	DW TIMP3 vs CTR
C1orf116	-2.0722	0.0097	0.0001	DW TIMP3 vs CTR
PLXNA2	-2.0711	0.0061	0	DW TIMP3 vs CTR
TMPRSS15	-2.0707	0.005	0	DW TIMP3 vs CTR
SLC4A4	-2.0616	0.0068	0	DW TIMP3 vs CTR
CD274	-2.0611	0.0072	0	DW TIMP3 vs CTR
SCD5	-2.047	0.006	0	DW TIMP3 vs CTR
HIST1H4L	-2.0443	0.0069	0	DW TIMP3 vs CTR
PLEKHA2	-2.0405	0.0068	0	DW TIMP3 vs CTR
CDH4	-2.0397	0.0068	0	DW TIMP3 vs CTR
TOX2	-2.0372	0.0068	0	DW TIMP3 vs CTR
MYLIP	-2.0371	0.0069	0	DW TIMP3 vs CTR
SLCO4A1	-2.0288	0.0068	0	DW TIMP3 vs CTR
LOC90768	-2.0219	0.0064	0	DW TIMP3 vs CTR
HJURP	-2.0213	0.0073	0	DW TIMP3 vs CTR
SYNGR1	-2.0203	0.0069	0	DW TIMP3 vs CTR
DKK1	-2.0196	0.0069	0	DW TIMP3 vs CTR
MRPL52	-2.0146	0.0069	0	DW TIMP3 vs CTR
LAMA5	-2.0132	0.0067	0	DW TIMP3 vs CTR
CALD1	-2.0072	0.0069	0	DW TIMP3 vs CTR
