# Supplementary material for: Transcriptomic landscape of TIMP3 oncosuppressor activity in thyroid carcinoma
Source: Cancer Cell Int. 2022 Dec 12;22:400. doi: 10.1186/s12935-022-02811-8 (PMC9743531; doi:10.1186/s12935-022-02811-8)
Supplement: Supplementary file 10 — Additional file 10: Table S9. GO functional enriched terms in NIM1-T23 versus NIM1-EV clones. Details of the top 30 significantly enriched GO-BP terms in NIM1-T23 clone compared to NIM1-EV control by cluster Profiler analysis on 290 differentially expressed genes. [file 12935_2022_2811_MOESM10_ESM.xlsx]

## Sheet: Foglio1
ID	Description	GeneRatio	BgRatio	pvalue	p.adjust	qvalue	geneID	Count
GO:0001666	response to hypoxia	18/219	307/18722	2.34947e-08	6.39585e-05	5.2402e-05	MMP2/ANKRD1/CPEB2/KCNMA1/PLAT/STC2/EDNRA/ACAA2/CXCR4/CA9/EPAS1/DDIT4/STC1/NOS1/NDNF/PDLIM1/NR4A2/EGR1	18
GO:0036293	response to decreased oxygen levels	18/219	322/18722	4.86808e-08	6.39585e-05	5.2402e-05	MMP2/ANKRD1/CPEB2/KCNMA1/PLAT/STC2/EDNRA/ACAA2/CXCR4/CA9/EPAS1/DDIT4/STC1/NOS1/NDNF/PDLIM1/NR4A2/EGR1	18
GO:0002237	response to molecule of bacterial origin	19/219	363/18722	5.78635e-08	6.39585e-05	5.2402e-05	ABCA1/MIR433/GJA1/F2R/MIR431/ANKRD1/TNFAIP3/CD274/TIMP4/NR4A1/PTPN22/DMBT1/IL1A/SERPINE1/CXCL8/NOS1/FOS/CCL2/IL24	19
GO:0048771	tissue remodeling	13/219	175/18722	1.49124e-07	8.28067e-05	6.78446e-05	FOXC2/GPNMB/GJA1/MMP2/F2R/SPP1/MITF/PDK4/MDK/TNFAIP3/EPAS1/SEMA3C/IL1A	13
GO:1903034	regulation of response to wounding	12/219	167/18722	6.48389e-07	0.000307151	0.000251653	FOXC2/GJA1/F2R/HBEGF/SPP1/F2RL1/MIR431/MDK/PLAT/TNFAIP3/CXCR4/SERPINE1	12
GO:0001822	kidney development	15/219	293/18722	1.98438e-06	0.000822527	0.000673907	HAS2/FOXC2/ADAMTS1/LHX1/FBN1/ROBO2/RDH10/LAMA5/BASP1/SLIT2/HES1/SERPINB7/ADAMTS6/RARB/EGR1	15
GO:0003018	vascular process in circulatory system	14/219	263/18722	2.79076e-06	0.000954866	0.000782334	FOXC2/GJA1/F2R/F2RL1/GPER1/ARHGAP42/SLC16A12/SLC44A1/KCNMA1/EDNRA/SLC4A4/SLIT2/SLC1A3/NOS1	14
GO:0061042	vascular wound healing	5/219	22/18722	4.68479e-06	0.00141225	0.00115708	FOXC2/TNFAIP3/CXCR4/SERPINE1/NDNF	5
GO:0071216	cellular response to biotic stimulus	13/219	246/18722	6.89109e-06	0.0016322	0.00133729	ABCA1/MIR433/MIR431/ANKRD1/TNFAIP3/CD274/PTPN22/IL1A/SERPINE1/CXCL8/TXNIP/CCL2/IL24	13
GO:0009410	response to xenobiotic stimulus	18/219	462/18722	8.8777e-06	0.00186255	0.00152601	ABCA1/CYP2E1/MDK/ANKRD1/HMGCS1/GABRG3/TIMP4/CXCR4/SMOX/SLC1A3/CA9/AADAC/SEMA3C/NOS1/FOS/NNMT/AOX1/TXNIP	18
GO:0048608	reproductive structure development	17/219	424/18722	1.09672e-05	0.00186255	0.00152601	GJA1/ADAMTS1/SPP1/LHX1/HMGCS1/STC2/ROBO2/NKX2-1/RDH10/BASP1/SLIT2/HES1/EPAS1/ITGB8/SERPINA5/STC1/TFAP2C	17
GO:0042698	ovulation cycle	7/219	68/18722	1.4409e-05	0.0020774	0.00170204	HAS2/ADAMTS1/MDK/ROBO2/SLIT2/TIMP4/EGR1	7
GO:0061043	regulation of vascular wound healing	4/219	14/18722	1.66322e-05	0.00224343	0.00183807	FOXC2/TNFAIP3/CXCR4/SERPINE1	4
GO:0031346	positive regulation of cell projection organization	15/219	353/18722	1.86508e-05	0.0023787	0.0019489	F2RL1/TOX/MIR431/MDK/ANKRD1/ROBO2/CDH4/PLXNA2/PTPRD/SLIT2/PRKD1/NEFL/EPHA3/NDNF/TENM3	15
GO:0010975	regulation of neuron projection development	17/219	445/18722	2.04116e-05	0.00249247	0.00204211	SPP1/TOX/MIR431/MDK/ANKRD1/ROBO2/MYLIP/CDH4/PLXNA2/PTPRD/SLIT2/PRKD1/SEMA3C/NEFL/EPHA3/NDNF/TENM3	17
GO:0007566	embryo implantation	6/219	53/18722	3.47134e-05	0.00371321	0.00304228	GJA1/MMP2/SPP1/IGFBP7/STC2/STC1	6
GO:0060485	mesenchyme development	13/219	291/18722	4.06072e-05	0.00417789	0.003423	HAS2/FOXC2/IL17RD/MDK/ROBO2/NKX2-1/EDNRA/RDH10/LAMA5/BASP1/HES1/SEMA3C/EPHA3	13
GO:0035296	regulation of tube diameter	9/219	141/18722	4.28372e-05	0.00417789	0.003423	FOXC2/GJA1/F2R/F2RL1/GPER1/ARHGAP42/KCNMA1/EDNRA/NOS1	9
GO:0097746	blood vessel diameter maintenance	9/219	141/18722	4.28372e-05	0.00417789	0.003423	FOXC2/GJA1/F2R/F2RL1/GPER1/ARHGAP42/KCNMA1/EDNRA/NOS1	9
GO:0014706	striated muscle tissue development	15/219	384/18722	4.91434e-05	0.00452665	0.00370874	TLL2/FOXC2/GJA1/AKAP6/SORBS2/ANKRD1/SVIL/HOXD10/DKK1/NR4A1/HEG1/SEMA3C/FOS/RARB/EGR1	15
GO:0010720	positive regulation of cell development	13/219	298/18722	5.18219e-05	0.00464436	0.00380519	HAS2/NEDD9/GPER1/MDK/ROBO2/CDH4/PLXNA2/PTPRD/SLIT2/AURKA/CXCR4/HES1/NEFL	13
GO:0030198	extracellular matrix organization	13/219	301/18722	5.73987e-05	0.00493552	0.00404374	TLL2/HAS2/FOXC2/MMP2/ADAMTS1/COL8A1/MMP1/LUM/THSD4/ADAMTS6/PXDN/LAMB3/NDNF	13
GO:0043062	extracellular structure organization	13/219	302/18722	5.93702e-05	0.00493552	0.00404374	TLL2/HAS2/FOXC2/MMP2/ADAMTS1/COL8A1/MMP1/LUM/THSD4/ADAMTS6/PXDN/LAMB3/NDNF	13
GO:0045785	positive regulation of cell adhesion	16/219	437/18722	5.95358e-05	0.00493552	0.00404374	HAS2/FOXC2/NEDD9/COL8A1/NFKBIZ/MDK/FRMD5/EDIL3/PLEKHA2/CD274/HES1/PTPN22/IL1A/NDNF/NR4A3/CCL2	16
GO:0050920	regulation of chemotaxis	11/219	223/18722	6.62077e-05	0.00522726	0.00428276	F2RL1/GPR183/MDK/ROBO2/SLIT2/CXCR4/PRKD1/SEMA3C/SERPINE1/CXCL8/CCL2	11
GO:0030279	negative regulation of ossification	5/219	38/18722	7.66815e-05	0.00591339	0.00484492	STATH/MDK/DKK1/SRGN/ENPP1	5
GO:0014909	smooth muscle cell migration	7/219	97/18722	0.000143416	0.0101185	0.00829018	HAS2/ADAMTS1/MDK/PLAT/SLIT2/SERPINE1/NR4A3	7
GO:0031960	response to corticosteroid	9/219	167/18722	0.000157669	0.0108923	0.00892422	IGFBP7/GPER1/MDK/SLIT2/KLF9/DDIT4/STC1/NEFL/FOS	9
GO:0048703	embryonic viscerocranium morphogenesis	3/219	10/18722	0.000178309	0.0120591	0.00988019	FOXC2/LHX1/RDH10	3
GO:0033555	multicellular organismal response to stress	6/219	71/18722	0.000181832	0.0120591	0.00988019	GJA1/LPAR5/MDK/SCN9A/NOS1/NR4A2	6
