# Supplementary material for: Transcriptomic landscape of TIMP3 oncosuppressor activity in thyroid carcinoma
Source: Cancer Cell Int. 2022 Dec 12;22:400. doi: 10.1186/s12935-022-02811-8 (PMC9743531; doi:10.1186/s12935-022-02811-8)
Supplement: Supplementary file 11 — Additional file 11: Table S10. Differential gene expression analysis in IV versus I TIMP3 quartile. List of 8010 differentially expressed genes by DeSeq2 analysis in IV versus I TIMP3 quartile at FDR < 1%. Up- (3853/8010, 48%) and down-regulated (4157/8010, 52%) genes are ordered according to fold change (FC) value. Gene symbols of 1660 genes (949/1660, 57% up-regulated and 711/1660, 43% down-regulated) showing a FC of at least 2 are underlined. [file 12935_2022_2811_MOESM11_ESM.xlsx]

## Sheet: 8010DIFF.EXPR.GENES
Gene symbol	Entrez ID	log2FoldChange	Fold change	stat	pvalue	padj
CARTPT	9607	6.72239	105.595	13.1787	1.16e-39	6.08e-37
KRT85	3891	5.03878	32.8719	10.1814	2.4e-24	1.63e-22
PPY	5539	4.82992	28.4414	6.54383	6e-11	5.91e-10
SLC14A2	8170	4.68239	25.6768	14.9448	1.68e-50	3.32e-47
SFRP1	6422	4.54472	23.3398	17.0823	2.01e-65	1.78e-61
RGS8	85397	4.44492	21.7798	9.07492	1.14e-19	4.01e-18
SLC5A5	6528	4.31526	19.9078	11.7138	1.08e-31	1.7e-29
ATP2B3	492	4.29824	19.6743	4.17318	3e-05	0.000106834
COL9A3	1299	4.29106	19.5766	13.1065	3.02e-39	1.49e-36
CUX2	23316	4.23708	18.8577	11.0327	2.66e-28	2.81e-26
C6orf176	90632	4.22698	18.7261	14.5462	6.17e-48	8.22e-45
NEB	4703	4.18942	18.2449	15.2128	2.91e-52	1.03e-48
AGXT2L1	64850	4.00718	16.0799	10.5289	6.36e-26	5.22e-24
KLK15	55554	3.69567	12.9571	9.67609	3.81e-22	1.92e-20
KIF1A	547	3.654	12.5882	12.1443	6.15e-34	1.21e-31
FER1L6	654463	3.61237	12.2301	9.1016	8.9e-20	3.2e-18
LIPI	149998	3.42777	10.7613	6.42972	1.28e-10	1.19e-09
PPP2R2C	5522	3.40653	10.604	11.5101	1.17e-30	1.59e-28
NOS1	4842	3.31756	9.96979	8.88736	6.26e-19	1.97e-17
SCUBE1	80274	3.31572	9.95709	15.0931	1.8e-51	5.32e-48
RAG2	5897	3.2918	9.7933	5.60209	2.12e-08	1.37e-07
SERPIND1	3053	3.28217	9.72815	9.12849	6.95e-20	2.52e-18
SLC6A17	388662	3.25483	9.54558	12.8085	1.47e-37	5.67e-35
WFDC8	90199	3.25378	9.53864	4.94855	7.48e-07	3.61e-06
CSF3	1440	3.21632	9.29414	7.89253	2.96e-15	5.51e-14
VGF	7425	3.21218	9.26747	8.78963	1.5e-18	4.49e-17
C14orf180	400258	3.21013	9.25437	6.91179	4.79e-12	5.53e-11
CD300LG	146894	3.17709	9.04483	13.0329	7.95e-39	3.62e-36
SOSTDC1	25928	3.12806	8.7426	11.168	5.85e-29	6.53e-27
KRT71	112802	3.09733	8.55835	7.48538	7.13e-14	1.07e-12
BMP8A	353500	3.07023	8.39907	10.0673	7.7e-24	4.81e-22
ADARB2	105	3.05733	8.32428	6.60304	4.03e-11	4.05e-10
CHRNA4	1137	3.01368	8.07622	9.46306	2.99e-21	1.32e-19
LEFTY2	7044	2.98267	7.90446	9.41091	4.92e-21	2.11e-19
FAM163A	148753	2.97672	7.87194	10.899	1.17e-27	1.15e-25
C8A	731	2.9611	7.78718	8.12175	4.6e-16	9.61e-15
CALN1	83698	2.95879	7.77473	8.47021	2.45e-17	6.2e-16
SCN3A	6328	2.95315	7.74437	13.8312	1.65e-43	1.33e-40
GDF10	2662	2.95197	7.73807	9.39184	5.9e-21	2.5e-19
TRIM50	135892	2.94313	7.69077	10.0055	1.44e-23	8.82e-22
BANF2	140836	2.92657	7.603	5.76766	8.04e-09	5.58e-08
CDH16	1014	2.92147	7.57618	9.63937	5.45e-22	2.67e-20
SEC14L3	266629	2.88163	7.36982	7.77406	7.6e-15	1.33e-13
LOC441177	441177	2.88154	7.36938	8.77902	1.65e-18	4.9e-17
DRD1	1812	2.879	7.35641	9.33699	9.91e-21	4.07e-19
HMGCS2	3158	2.8636	7.27831	6.43738	1.22e-10	1.14e-09
USH1C	10083	2.85655	7.2428	8.29281	1.11e-16	2.56e-15
PRRT4	401399	2.8239	7.08073	9.145	5.96e-20	2.18e-18
SLC7A10	56301	2.81968	7.06005	9.87408	5.39e-23	3.08e-21
TAC1	6863	2.78045	6.87067	5.78675	7.18e-09	5.04e-08
MYOC	4653	2.77895	6.86351	7.30145	2.85e-13	3.94e-12
LOC116437	116437	2.74476	6.70277	7.26831	3.64e-13	4.95e-12
PPYR1	5540	2.70412	6.51659	8.28798	1.15e-16	2.66e-15
C1orf158	93190	2.69614	6.48066	6.57494	4.87e-11	4.85e-10
CILP	8483	2.69427	6.47227	9.73577	2.12e-22	1.11e-20
KANK4	163782	2.68657	6.43781	9.93104	3.05e-23	1.79e-21
LOC286002	286002	2.64126	6.23877	9.9142	3.61e-23	2.11e-21
PYGM	5837	2.62795	6.18146	10.8567	1.85e-27	1.82e-25
UPF0639	400224	2.62622	6.17407	8.67428	4.16e-18	1.17e-16
GPR142	350383	2.6217	6.15477	6.20324	5.53e-10	4.66e-09
KCNA2	3737	2.61523	6.12722	8.69209	3.56e-18	1.02e-16
FAM180B	399888	2.56402	5.91354	8.26433	1.4e-16	3.18e-15
ADIG	149685	2.56273	5.90826	9.38242	6.45e-21	2.72e-19
CSMD1	64478	2.52369	5.75053	9.03212	1.68e-19	5.74e-18
TIMP3	7078	2.51995	5.73563	38.0487	0	0
ODAM	54959	2.51947	5.73372	5.73477	9.76e-09	6.68e-08
LRP1B	53353	2.51869	5.73062	8.03401	9.43e-16	1.88e-14
IGFBPL1	347252	2.51569	5.71872	10.3653	3.57e-25	2.67e-23
DGKI	9162	2.51152	5.70222	11.874	1.62e-32	2.76e-30
FAM167A	83648	2.50219	5.66547	12.0052	3.34e-33	6.23e-31
COL25A1	84570	2.49988	5.65638	12.6657	9.15e-37	3.01e-34
C1orf64	149563	2.49987	5.65634	6.28726	3.23e-10	2.83e-09
UPK3A	7380	2.49268	5.62824	7.99697	1.28e-15	2.49e-14
AQP12B	653437	2.48282	5.58989	3.0584	0.00222523	0.00531755
TPO	7173	2.48112	5.58333	8.47207	2.41e-17	6.11e-16
C9orf171	389799	2.47993	5.5787	5.71127	1.12e-08	7.6e-08
MAPK4	5596	2.47774	5.57023	10.1321	3.98e-24	2.62e-22
WNT11	7481	2.46851	5.53473	11.2808	1.63e-29	1.94e-27
KIF19	124602	2.44793	5.45633	9.35439	8.41e-21	3.49e-19
BCAN	63827	2.44156	5.43229	9.65845	4.53e-22	2.25e-20
KIAA1239	57495	2.43612	5.41184	4.83388	1.34e-06	6.18e-06
RYR2	6262	2.40147	5.28343	10.4905	9.55e-26	7.7e-24
RBM24	221662	2.40067	5.28047	12.3267	6.51e-35	1.52e-32
CIB4	130106	2.391	5.2452	6.56882	5.07e-11	5.04e-10
NOX5	79400	2.38849	5.23609	8.16643	3.18e-16	6.85e-15
PIP	5304	2.38457	5.2219	5.05405	4.33e-07	2.18e-06
BTBD17	388419	2.36641	5.15658	5.28549	1.25e-07	6.96e-07
SFTPC	6440	2.36004	5.13386	7.20854	5.66e-13	7.43e-12
RADIL	55698	2.34547	5.08227	11.7693	5.62e-32	9.23e-30
SLC5A8	160728	2.34538	5.08194	7.52964	5.09e-14	7.88e-13
BTNL8	79908	2.3411	5.0669	10.7544	5.65e-27	5.28e-25
LIPF	8513	2.3344	5.04342	3.65051	0.000261722	0.000768537
PVALB	5816	2.32818	5.02173	6.91757	4.59e-12	5.33e-11
SYT3	84258	2.32724	5.01844	8.76856	1.81e-18	5.34e-17
AKR1B15	441282	2.31495	4.97588	4.17939	2.92e-05	0.000104167
SDK2	54549	2.30625	4.94596	13.9274	4.32e-44	3.83e-41
MT3	4504	2.30598	4.94504	8.00081	1.24e-15	2.42e-14
TBX5	6910	2.30288	4.93441	5.86803	4.41e-09	3.2e-08
GSDMC	56169	2.27426	4.83751	8.73487	2.44e-18	7.05e-17
ARC	23237	2.26816	4.81707	8.7585	1.98e-18	5.81e-17
SLC26A3	1811	2.26408	4.80349	5.56665	2.6e-08	1.65e-07
ARMC3	219681	2.24486	4.73991	4.88986	1.01e-06	4.76e-06
TNN	63923	2.23864	4.71953	8.97943	2.72e-19	9.05e-18
ABCC12	94160	2.23487	4.70719	4.31435	1.6e-05	5.99e-05
CA4	762	2.22773	4.68396	7.30658	2.74e-13	3.81e-12
MYL3	4634	2.22199	4.66535	6.03313	1.61e-09	1.25e-08
DES	1674	2.20158	4.59982	8.63534	5.86e-18	1.62e-16
KCNB1	3745	2.20037	4.59596	9.07782	1.11e-19	3.91e-18
KCNJ13	3769	2.19353	4.57423	8.45818	2.72e-17	6.83e-16
BTNL3	10917	2.19294	4.57236	5.51539	3.48e-08	2.16e-07
SCGB1D2	10647	2.18936	4.56104	5.61639	1.95e-08	1.27e-07
NPY6R	4888	2.18764	4.55559	4.86351	1.15e-06	5.4e-06
CNTNAP2	26047	2.18513	4.54768	9.39848	5.54e-21	2.36e-19
C8orf12	83656	2.18051	4.53313	5.05958	4.2e-07	2.12e-06
HGD	3081	2.17839	4.52647	9.50612	1.98e-21	9.03e-20
THBS4	7060	2.17473	4.51502	8.44939	2.93e-17	7.32e-16
INHBC	3626	2.16617	4.48831	9.88698	4.74e-23	2.72e-21
SBSN	374897	2.16321	4.47909	6.58415	4.57e-11	4.58e-10
ALDH1L1	10840	2.15654	4.45845	8.71677	2.86e-18	8.19e-17
CRABP1	1381	2.15241	4.44571	7.1764	7.16e-13	9.26e-12
AGTR1	185	2.14883	4.43468	8.1797	2.85e-16	6.2e-15
PLP1	5354	2.14294	4.41662	6.04628	1.48e-09	1.16e-08
DLG2	1740	2.14291	4.41652	10.7865	3.99e-27	3.78e-25
FAM189A1	23359	2.14179	4.4131	8.74341	2.26e-18	6.58e-17
LINGO2	158038	2.12363	4.3579	6.39237	1.63e-10	1.5e-09
SLC5A7	60482	2.11218	4.32344	4.23396	2.3e-05	8.37e-05
C9orf71	169693	2.11004	4.31704	2.98045	0.00287821	0.00668723
GALR1	2587	2.09935	4.28516	7.14373	9.08e-13	1.16e-11
DNTT	1791	2.09578	4.27456	5.71203	1.12e-08	7.57e-08
MMEL1	79258	2.08985	4.25704	5.2213	1.78e-07	9.56e-07
SCARA5	286133	2.08653	4.24727	5.88424	4e-09	2.93e-08
ATP1B2	482	2.08646	4.24704	12.9658	1.91e-38	8.28e-36
CHRM1	1128	2.08072	4.23019	7.55936	4.05e-14	6.35e-13
MRO	83876	2.07686	4.21889	7.79124	6.64e-15	1.18e-13
ZDHHC22	283576	2.07615	4.21681	6.98243	2.9e-12	3.44e-11
LGI2	55203	2.07356	4.20925	12.5405	4.48e-36	1.28e-33
PART1	25859	2.07174	4.20394	5.29663	1.18e-07	6.59e-07
ALX4	60529	2.06627	4.18804	4.51886	6.22e-06	2.5e-05
ATP1A2	477	2.06574	4.1865	11.668	1.86e-31	2.84e-29
SLC35F1	222553	2.05946	4.16831	10.5285	6.39e-26	5.22e-24
SLC2A4	6517	2.05849	4.16549	11.8549	2.03e-32	3.4e-30
C13orf36	400120	2.05614	4.15871	6.46316	1.03e-10	9.75e-10
DIO2	1734	2.05392	4.15233	13.4694	2.37e-41	1.68e-38
SLC25A15	10166	2.05137	4.14501	12.0273	2.55e-33	4.87e-31
LGI3	203190	2.05056	4.14267	10.1123	4.87e-24	3.17e-22
SERPINA5	5104	2.04797	4.13524	6.46314	1.03e-10	9.75e-10
SYN3	8224	2.04646	4.13091	14.0829	4.84e-45	4.52e-42
FABP4	2167	2.0454	4.12787	7.0058	2.46e-12	2.95e-11
MAFA	389692	2.03542	4.09942	6.25394	4e-10	3.44e-09
PLXNA4	91584	2.0329	4.09226	11.7303	8.92e-32	1.41e-29
SELE	6401	2.03204	4.08982	9.74142	2.01e-22	1.05e-20
VIT	5212	2.02489	4.06962	5.5196	3.4e-08	2.12e-07
BET3L	100128327	2.02421	4.06768	8.08654	6.14e-16	1.26e-14
PDE7B	27115	2.02407	4.0673	14.9239	2.3e-50	4.09e-47
SLC26A4	5172	2.02094	4.05847	9.29101	1.53e-20	6.1e-19
FAM123A	219287	2.01364	4.03799	3.17485	0.00149912	0.00371806
HOXA13	3209	2.006	4.01667	5.85411	4.8e-09	3.47e-08
NTN3	4917	2.00587	4.01632	6.42489	1.32e-10	1.22e-09
KIT	3815	2.0051	4.01415	9.18911	3.96e-20	1.48e-18
LMX1B	4010	2.00383	4.01063	6.01977	1.75e-09	1.35e-08
C1orf95	375057	2.00082	4.00227	10.2479	1.21e-24	8.59e-23
NEU4	129807	1.99911	3.99754	6.99704	2.61e-12	3.12e-11
RXFP1	59350	1.99808	3.99469	9.29154	1.52e-20	6.08e-19
SELV	348303	1.9905	3.97376	6.47419	9.53e-11	9.1e-10
PI16	221476	1.98709	3.96436	7.50525	6.13e-14	9.36e-13
AVPR1A	552	1.98487	3.95828	8.48185	2.22e-17	5.7e-16
EBF2	64641	1.98307	3.95333	12.0291	2.5e-33	4.82e-31
ZNF536	9745	1.977	3.93675	6.03543	1.59e-09	1.24e-08
TCF21	6943	1.97303	3.92592	7.38802	1.49e-13	2.14e-12
LRFN2	57497	1.9726	3.92476	5.62916	1.81e-08	1.19e-07
GLDN	342035	1.95858	3.88679	6.09025	1.13e-09	9.07e-09
EYA4	2070	1.95772	3.88447	7.00018	2.56e-12	3.06e-11
RERGL	79785	1.95141	3.86751	7.52522	5.26e-14	8.13e-13
TFF3	7033	1.94859	3.85996	6.47085	9.75e-11	9.29e-10
ADM2	79924	1.94846	3.85961	10.0311	1.11e-23	6.91e-22
THSD7B	80731	1.94226	3.84307	12.8292	1.13e-37	4.54e-35
LIFR	3977	1.93634	3.82734	13.4086	5.38e-41	3.41e-38
SH3GL2	6456	1.93218	3.81633	6.63072	3.34e-11	3.41e-10
CXorf22	170063	1.92504	3.79746	5.64313	1.67e-08	1.1e-07
CCL11	6356	1.92462	3.79637	3.53398	0.00040935	0.0011532
LOC647309	647309	1.92344	3.79326	4.29004	1.79e-05	6.64e-05
PLA2G3	50487	1.92159	3.78839	7.80175	6.11e-15	1.09e-13
C14orf68	283600	1.92152	3.78822	7.1223	1.06e-12	1.34e-11
GABRG1	2565	1.92032	3.78507	6.99154	2.72e-12	3.24e-11
PITX2	5308	1.91914	3.78197	3.42731	0.000609585	0.00164496
PAX1	5075	1.91866	3.78071	3.85275	0.0001168	0.000368071
STAB2	55576	1.91383	3.76809	5.62082	1.9e-08	1.24e-07
RFX4	5992	1.89857	3.72843	6.54026	6.14e-11	6.04e-10
TFCP2L1	29842	1.89667	3.72353	8.84762	8.94e-19	2.75e-17
EEF1A2	1917	1.89531	3.72002	6.43942	1.2e-10	1.12e-09
CYP26B1	56603	1.88722	3.69921	10.253	1.15e-24	8.21e-23
SNX31	169166	1.88097	3.68322	7.03768	1.95e-12	2.37e-11
CLCNKB	1188	1.87142	3.65892	9.46822	2.85e-21	1.26e-19
PYY	5697	1.87028	3.65605	5.49226	3.97e-08	2.44e-07
FLJ37543	285668	1.86843	3.65135	6.08051	1.2e-09	9.59e-09
MPPED2	744	1.86353	3.63898	8.09603	5.68e-16	1.18e-14
CALY	50632	1.86197	3.63503	3.63337	0.000279743	0.000816593
ZNF648	127665	1.85818	3.6255	4.96354	6.92e-07	3.36e-06
SYT13	57586	1.8543	3.61577	8.04784	8.43e-16	1.69e-14
KCNJ1	3758	1.85364	3.61412	7.00485	2.47e-12	2.97e-11
STXBP5L	9515	1.84104	3.58269	6.67017	2.56e-11	2.66e-10
EDNRB	1910	1.83958	3.57905	13.8404	1.45e-43	1.23e-40
FMO1	2326	1.83304	3.56287	7.95648	1.77e-15	3.4e-14
ELOVL2	54898	1.8249	3.54284	12.3861	3.11e-35	7.56e-33
TSPAN18	90139	1.82246	3.53683	11.4224	3.23e-30	4.18e-28
HOXB9	3219	1.81449	3.51735	4.12886	3.65e-05	0.000127042
C2orf39	92749	1.81093	3.50869	5.62272	1.88e-08	1.23e-07
PCDH11X	27328	1.81031	3.50717	5.60631	2.07e-08	1.34e-07
CMTM5	116173	1.80883	3.50357	6.81305	9.56e-12	1.06e-10
DHDPSL	112817	1.80819	3.50203	8.14358	3.84e-16	8.16e-15
KRT83	3889	1.80303	3.48951	9.26521	1.95e-20	7.65e-19
SLC5A4	6527	1.80255	3.48837	10.8004	3.43e-27	3.3e-25
TECRL	253017	1.80154	3.48591	3.47253	0.000515585	0.00141936
LRTM2	654429	1.80025	3.4828	4.05688	4.97e-05	0.000168898
VWC2	375567	1.79105	3.46067	3.8998	9.63e-05	0.000308362
COL9A1	1297	1.78022	3.43478	8.99378	2.39e-19	8e-18
CNTFR	1271	1.77603	3.42484	4.33117	1.48e-05	5.59e-05
GPC3	2719	1.77581	3.42431	7.7089	1.27e-14	2.13e-13
VIPR1	7433	1.77099	3.41289	9.47752	2.6e-21	1.16e-19
OGDHL	55753	1.7687	3.40746	8.77176	1.76e-18	5.2e-17
CYP17A1	1586	1.76778	3.40529	7.8809	3.25e-15	6.02e-14
MAOB	4129	1.76776	3.40526	8.22803	1.9e-16	4.23e-15
SMR3B	10879	1.75884	3.38426	3.67952	0.000233671	0.000693859
C16orf73	254528	1.75679	3.37944	3.92296	8.75e-05	0.000282608
GLT8D2	83468	1.75497	3.3752	9.99898	1.54e-23	9.39e-22
A2BP1	54715	1.75473	3.37464	4.76872	1.85e-06	8.27e-06
C7orf52	375607	1.75456	3.37422	5.56823	2.57e-08	1.64e-07
HAP1	9001	1.75324	3.37114	8.53043	1.46e-17	3.85e-16
SCN4B	6330	1.74993	3.36342	12.9699	1.81e-38	8.04e-36
KCNQ2	3785	1.74873	3.36063	3.76069	0.000169442	0.000518941
HHIPL2	79802	1.7479	3.3587	5.3514	8.73e-08	5e-07
DCLK3	85443	1.74616	3.35464	11.5975	4.24e-31	6.17e-29
WSCD2	9671	1.74431	3.35033	5.39835	6.73e-08	3.93e-07
HS6ST3	266722	1.74364	3.34879	7.94102	2.01e-15	3.83e-14
SHANK1	50944	1.74296	3.34722	10.3359	4.85e-25	3.55e-23
TTC29	83894	1.7414	3.34359	3.91419	9.07e-05	0.000292224
DIRAS2	54769	1.73679	3.33294	9.35633	8.26e-21	3.44e-19
ADCY1	107	1.73196	3.3218	11.5689	5.92e-31	8.39e-29
CXorf30	645090	1.73079	3.3191	3.93744	8.24e-05	0.000268046
LOC572558	572558	1.73053	3.31849	5.26682	1.39e-07	7.63e-07
ITGB1BP3	27231	1.72842	3.31366	3.43898	0.000583911	0.0015846
GBA3	57733	1.72772	3.31205	5.07063	3.96e-07	2.01e-06
NBLA00301	79804	1.72702	3.31044	7.02117	2.2e-12	2.66e-11
QRFPR	84109	1.725	3.3058	7.76739	8.01e-15	1.39e-13
LOXHD1	125336	1.72388	3.30323	7.48316	7.26e-14	1.09e-12
SP6	80320	1.72304	3.30132	9.4566	3.18e-21	1.4e-19
ADH1B	125	1.72149	3.29777	5.74523	9.18e-09	6.32e-08
CORO2B	10391	1.72018	3.29478	12.4311	1.77e-35	4.49e-33
DAND5	199699	1.71576	3.2847	7.39131	1.45e-13	2.1e-12
GLDC	2731	1.7153	3.28364	4.96143	7e-07	3.4e-06
CAPSL	133690	1.71459	3.28204	6.50074	7.99e-11	7.73e-10
ALAS2	212	1.71417	3.28107	5.4645	4.64e-08	2.81e-07
C5orf47	133491	1.70974	3.27102	6.36229	1.99e-10	1.8e-09
SSPO	23145	1.70503	3.26037	7.52515	5.27e-14	8.13e-13
HAPLN2	60484	1.70388	3.25777	7.17858	7.04e-13	9.14e-12
KHDRBS2	202559	1.70373	3.25742	7.70926	1.27e-14	2.13e-13
APOC1P1	342	1.70372	3.2574	4.18476	2.85e-05	0.000101941
RSPO1	284654	1.70329	3.25642	3.44146	0.000578595	0.00157257
ARSF	416	1.70138	3.25212	3.60733	0.00030936	0.000896851
DDIT4L	115265	1.7001	3.24924	8.4333	3.36e-17	8.3e-16
OGN	4969	1.69853	3.2457	5.8517	4.87e-09	3.52e-08
RDH12	145226	1.69369	3.23484	8.87387	7.06e-19	2.21e-17
NPY5R	4889	1.6931	3.23351	7.30103	2.86e-13	3.95e-12
IGDCC3	9543	1.69212	3.23131	7.87079	3.52e-15	6.5e-14
ASTN1	460	1.69209	3.23123	6.90098	5.16e-12	5.92e-11
MLNR	2862	1.69069	3.22811	3.99892	6.36e-05	0.00021236
ART1	417	1.68749	3.22095	6.22839	4.71e-10	4.01e-09
SLC38A11	151258	1.6843	3.21385	9.95712	2.35e-23	1.39e-21
KBTBD5	131377	1.68282	3.21056	3.72534	0.000195052	0.000588139
BEGAIN	57596	1.68239	3.2096	11.5406	8.23e-31	1.13e-28
IPCEF1	26034	1.6755	3.19431	7.57785	3.51e-14	5.57e-13
SORBS2	8470	1.671	3.18436	11.8766	1.57e-32	2.7e-30
GRIA2	2891	1.66875	3.1794	4.22121	2.43e-05	8.81e-05
KLK2	3817	1.66826	3.1783	6.13496	8.52e-10	6.96e-09
TMEM132C	92293	1.66802	3.17777	5.28627	1.25e-07	6.94e-07
DPP6	1804	1.66739	3.17639	5.11641	3.11e-07	1.61e-06
FLNC	2318	1.66193	3.16439	8.36958	5.78e-17	1.38e-15
SLC4A4	8671	1.66179	3.1641	7.53382	4.93e-14	7.65e-13
FAM180A	389558	1.65601	3.15144	7.56409	3.91e-14	6.13e-13
APOLD1	81575	1.65151	3.14163	12.5089	6.68e-36	1.85e-33
RNF157	114804	1.65131	3.14119	8.49223	2.03e-17	5.26e-16
SPARCL1	8404	1.64995	3.13823	16.091	2.95e-58	1.75e-54
C20orf200	253868	1.64956	3.13737	4.21382	2.51e-05	9.07e-05
BDKRB1	623	1.64935	3.13693	9.99387	1.62e-23	9.85e-22
FHL1	2273	1.64625	3.13018	9.42084	4.47e-21	1.94e-19
MAPT	4137	1.64568	3.12895	7.96567	1.64e-15	3.17e-14
CYP19A1	1588	1.6448	3.12705	5.80029	6.62e-09	4.68e-08
FOXI2	399823	1.64473	3.12689	6.96382	3.31e-12	3.9e-11
C8B	732	1.64435	3.12608	3.82177	0.000132496	0.000413858
C6orf118	168090	1.64348	3.1242	5.2881	1.24e-07	6.88e-07
SLC17A7	57030	1.63847	3.11336	10.4951	9.1e-26	7.41e-24
RAG1	5896	1.63572	3.10742	8.03727	9.19e-16	1.83e-14
CES4	51716	1.63567	3.10733	4.43625	9.15e-06	3.57e-05
TEKT1	83659	1.63429	3.10436	2.85957	0.00424214	0.0094573
TBX4	9496	1.62888	3.09272	5.70822	1.14e-08	7.72e-08
LIPJ	142910	1.62871	3.09237	4.46843	7.88e-06	3.12e-05
TMEM174	134288	1.62556	3.08562	2.86714	0.00414205	0.00925973
KCNK9	51305	1.6221	3.07823	4.71864	2.37e-06	1.04e-05
SAMD5	389432	1.62021	3.07419	8.12134	4.61e-16	9.63e-15
AQP7	364	1.6131	3.05908	9.31844	1.18e-20	4.78e-19
SLC6A15	55117	1.61308	3.05903	3.29365	0.000988946	0.00255002
CCDC151	115948	1.61154	3.05579	8.80491	1.31e-18	3.95e-17
ZMAT4	79698	1.60582	3.04369	4.16531	3.11e-05	0.00011037
CXorf41	139212	1.60378	3.03939	3.85751	0.000114547	0.000361869
BDKRB2	624	1.6012	3.03396	11.4288	3e-30	3.92e-28
TRPC5	7224	1.59957	3.03054	4.91083	9.07e-07	4.32e-06
PRIMA1	145270	1.5986	3.0285	6.00802	1.88e-09	1.44e-08
C12orf39	80763	1.59555	3.02209	6.00585	1.9e-09	1.46e-08
MIOX	55586	1.59489	3.02071	6.47572	9.44e-11	9.02e-10
TRPM6	140803	1.59415	3.01917	9.05696	1.34e-19	4.66e-18
MYADML2	255275	1.59065	3.01184	3.54377	0.000394445	0.0011151
SLC4A1	6521	1.5895	3.00946	4.69594	2.65e-06	1.15e-05
CKMT2	1160	1.58677	3.00376	7.8961	2.88e-15	5.36e-14
PRKG1	5592	1.58563	3.00139	9.06652	1.23e-19	4.3e-18
FHL5	9457	1.58379	2.99756	10.2483	1.2e-24	8.58e-23
DLGAP2	9228	1.58334	2.99662	7.19723	6.14e-13	8.05e-12
MFAP4	4239	1.58288	2.99568	7.20451	5.83e-13	7.65e-12
PENK	5179	1.57939	2.98843	4.82194	1.42e-06	6.53e-06
TSPAN33	340348	1.57765	2.98484	9.19194	3.86e-20	1.45e-18
PDE2A	5138	1.5762	2.98183	14.4122	4.34e-47	4.81e-44
NFASC	23114	1.57599	2.9814	13.0635	5.32e-39	2.49e-36
ZNF804B	219578	1.5748	2.97895	3.64864	0.000263627	0.000773493
LOC401431	401431	1.5723	2.97379	9.18675	4.05e-20	1.51e-18
BTNL9	153579	1.57189	2.97294	9.40705	5.1e-21	2.18e-19
CHRNA2	1135	1.57155	2.97224	4.31895	1.57e-05	5.88e-05
ATP4A	495	1.56913	2.96726	5.78694	7.17e-09	5.03e-08
FLT1	2321	1.56773	2.96438	14.8888	3.9e-50	6.29e-47
ABCA8	10351	1.56502	2.95882	9.52691	1.62e-21	7.51e-20
OSBPL6	114880	1.56215	2.95294	9.02275	1.83e-19	6.21e-18
DMP1	1758	1.5594	2.94731	4.68173	2.84e-06	1.23e-05
TG	7038	1.55709	2.9426	10.9962	3.99e-28	4.11e-26
CAMP	820	1.55446	2.93724	5.72544	1.03e-08	7.04e-08
PDE10A	10846	1.55445	2.93721	10.4761	1.11e-25	8.89e-24
HLF	3131	1.55422	2.93675	8.45353	2.83e-17	7.09e-16
DIO1	1733	1.55296	2.93419	4.73218	2.22e-06	9.77e-06
TIMP4	7079	1.55212	2.93247	8.12438	4.5e-16	9.42e-15
CA14	23632	1.54805	2.92423	9.89811	4.24e-23	2.45e-21
FAM162B	221303	1.54726	2.92262	10.1233	4.35e-24	2.84e-22
KCNIP3	30818	1.54632	2.92071	11.1743	5.45e-29	6.16e-27
SPINLW1	57119	1.53969	2.90731	4.0432	5.27e-05	0.000178414
TLX1	3195	1.53831	2.90455	4.28238	1.85e-05	6.85e-05
EGR3	1960	1.53585	2.89959	7.69426	1.42e-14	2.38e-13
GRIP2	80852	1.52828	2.88442	8.40837	4.16e-17	1.02e-15
TSPAN19	144448	1.52779	2.88344	2.95517	0.00312494	0.0071953
BMP5	653	1.52635	2.88057	4.62471	3.75e-06	1.57e-05
NES	10763	1.52596	2.87978	15.0701	2.55e-51	5.65e-48
SLCO2A1	6578	1.52534	2.87855	15.6007	7.2e-55	3.19e-51
CNTN5	53942	1.52513	2.87813	5.26163	1.43e-07	7.83e-07
AOX1	316	1.52508	2.87803	5.63197	1.78e-08	1.17e-07
CWH43	80157	1.52487	2.8776	5.5037	3.72e-08	2.29e-07
LMOD1	25802	1.52476	2.87738	10.9561	6.21e-28	6.37e-26
KIAA0408	9729	1.52463	2.87714	3.45912	0.000541953	0.00148389
GCK	2645	1.52261	2.8731	6.02369	1.7e-09	1.32e-08
MGC42105	167359	1.52104	2.86997	7.21657	5.33e-13	7.03e-12
KCND3	3752	1.51737	2.86268	7.08143	1.43e-12	1.77e-11
KCNA1	3736	1.51707	2.8621	4.18994	2.79e-05	9.99e-05
HRC	3270	1.51648	2.86092	10.3546	3.99e-25	2.95e-23
HOXC10	3226	1.51546	2.8589	3.34189	0.000832099	0.00217883
ADH1C	126	1.51353	2.85508	5.27902	1.3e-07	7.17e-07
GPR98	84059	1.51345	2.85491	6.89028	5.57e-12	6.35e-11
PPARGC1A	10891	1.5119	2.85185	7.59773	3.01e-14	4.8e-13
ABCC11	85320	1.51163	2.85132	5.00873	5.48e-07	2.71e-06
KIAA1751	85452	1.51138	2.85082	7.92979	2.2e-15	4.18e-14
ASAM	79827	1.50887	2.84586	6.90821	4.91e-12	5.66e-11
GPR97	222487	1.50861	2.84536	7.10189	1.23e-12	1.55e-11
SLC10A6	345274	1.50838	2.8449	8.84916	8.82e-19	2.72e-17
EBF3	253738	1.50743	2.84303	11.768	5.71e-32	9.29e-30
HIGD1B	51751	1.50515	2.83853	10.4944	9.16e-26	7.42e-24
RELN	5649	1.50416	2.8366	4.93699	7.93e-07	3.82e-06
PLN	5350	1.50239	2.83312	10.2949	7.43e-25	5.36e-23
C13orf15	28984	1.50125	2.83088	13.1811	1.13e-39	6.07e-37
TRPC4	7223	1.50123	2.83085	11.9931	3.86e-33	7.14e-31
ST8SIA5	29906	1.50053	2.82946	6.54234	6.06e-11	5.96e-10
EXOC3L2	90332	1.49867	2.82582	11.5684	5.96e-31	8.39e-29
SEMA3D	223117	1.49629	2.82116	4.50681	6.58e-06	2.64e-05
SCGN	10590	1.49615	2.82088	4.34437	1.4e-05	5.29e-05
WDR72	256764	1.49524	2.81911	9.97865	1.89e-23	1.13e-21
EPHA5	2044	1.49129	2.8114	3.97433	7.06e-05	0.000233004
UOX	391051	1.49098	2.81079	7.12403	1.05e-12	1.33e-11
HSPB6	126393	1.48584	2.80079	8.89968	5.6e-19	1.78e-17
ELMOD1	55531	1.48498	2.79913	5.34556	9.01e-08	5.15e-07
ST6GAL1	6480	1.48354	2.79633	7.81517	5.49e-15	9.84e-14
ABCG2	9429	1.48353	2.79632	10.3953	2.61e-25	1.98e-23
STC2	8614	1.47887	2.78731	12.4967	7.78e-36	2.12e-33
PBX3	5090	1.47838	2.78635	10.106	5.2e-24	3.37e-22
ALDH4A1	8659	1.47809	2.78579	9.54093	1.42e-21	6.58e-20
LOC90586	90586	1.4773	2.78428	6.02414	1.7e-09	1.32e-08
BEX1	55859	1.47608	2.78193	6.98608	2.83e-12	3.36e-11
FAM26D	221301	1.47578	2.78134	4.09615	4.2e-05	0.000144571
PDGFD	80310	1.47519	2.7802	14.7265	4.35e-49	6.44e-46
PDE1B	5153	1.47377	2.77747	10.9511	6.56e-28	6.65e-26
NR4A3	8013	1.4734	2.77676	5.95502	2.6e-09	1.96e-08
KDR	3791	1.47209	2.77423	12.4215	2e-35	4.99e-33
LRRC50	123872	1.47045	2.77108	7.22943	4.85e-13	6.42e-12
TMEM215	401498	1.47014	2.77048	4.86346	1.15e-06	5.4e-06
LAMB4	22798	1.46909	2.76847	6.1967	5.77e-10	4.85e-09
CASQ2	845	1.46809	2.76656	9.45549	3.22e-21	1.41e-19
GDF7	151449	1.46551	2.7616	4.57533	4.75e-06	1.96e-05
FLRT1	23769	1.46518	2.76099	5.43509	5.48e-08	3.26e-07
ITGA10	8515	1.46337	2.75752	12.1275	7.55e-34	1.47e-31
HBB	3043	1.46187	2.75466	8.00878	1.16e-15	2.28e-14
NCRNA00164	554226	1.46143	2.75382	3.18694	0.00143786	0.00358063
SPINK5	11005	1.46087	2.75275	5.63383	1.76e-08	1.16e-07
DGKB	1607	1.46083	2.75267	9.12895	6.92e-20	2.52e-18
MYH11	4629	1.46038	2.75182	8.84342	9.28e-19	2.85e-17
IGF2BP1	10642	1.45996	2.751	3.53827	0.000402763	0.00113663
SLC6A3	6531	1.45987	2.75084	6.44473	1.16e-10	1.09e-09
NXNL1	115861	1.45723	2.7458	4.24592	2.18e-05	7.97e-05
FOXG1	2290	1.45716	2.74568	4.13474	3.55e-05	0.0001241
RCAN2	10231	1.45675	2.74489	10.9244	8.81e-28	8.78e-26
MASP1	5648	1.45523	2.742	5.77164	7.85e-09	5.47e-08
DPT	1805	1.45519	2.74194	4.85713	1.19e-06	5.56e-06
SEZ6L	23544	1.45505	2.74166	4.9307	8.19e-07	3.93e-06
SULT1C4	27233	1.45348	2.73869	9.93412	2.96e-23	1.74e-21
SLCO1C1	53919	1.45283	2.73745	9.59613	8.3e-22	3.98e-20
CACNB2	783	1.45186	2.7356	8.8525	8.56e-19	2.65e-17
ANO2	57101	1.45008	2.73224	9.8116	1e-22	5.51e-21
IL6	3569	1.4498	2.7317	5.29599	1.18e-07	6.61e-07
NPAS4	266743	1.44738	2.72713	3.77879	0.000157593	0.000485669
PASK	23178	1.44405	2.72084	7.06433	1.61e-12	1.99e-11
GJC1	10052	1.44349	2.71978	13.4532	2.95e-41	1.94e-38
GJA3	2700	1.44276	2.71841	6.52743	6.69e-11	6.55e-10
MFAP5	8076	1.44134	2.71572	4.91761	8.76e-07	4.18e-06
GRIK4	2900	1.43986	2.71295	5.80824	6.31e-09	4.47e-08
HEMGN	55363	1.4369	2.70739	4.3261	1.52e-05	5.71e-05
C4orf31	79625	1.4367	2.70701	7.77129	7.77e-15	1.35e-13
DGAT2	84649	1.43603	2.70576	8.33437	7.79e-17	1.84e-15
F10	2159	1.43578	2.70529	7.89238	2.96e-15	5.52e-14
DNASE1L3	1776	1.4349	2.70364	7.60471	2.86e-14	4.59e-13
AOC3	8639	1.43231	2.69878	12.7022	5.75e-37	1.96e-34
PLD5	200150	1.43217	2.69852	4.32983	1.49e-05	5.62e-05
TMEM204	79652	1.43094	2.69623	14.5428	6.49e-48	8.22e-45
LMO1	4004	1.42895	2.69251	6.04336	1.51e-09	1.18e-08
NOG	9241	1.42891	2.69244	6.67947	2.4e-11	2.5e-10
RGS5	8490	1.42801	2.69075	11.3263	9.72e-30	1.19e-27
CCDC108	255101	1.42676	2.68842	7.95191	1.84e-15	3.52e-14
IFLTD1	160492	1.42444	2.6841	3.18834	0.00143091	0.00356633
SMOC2	64094	1.42302	2.68146	7.52158	5.41e-14	8.32e-13
FLT4	2324	1.42217	2.67988	12.7966	1.71e-37	6.34e-35
KLK5	25818	1.42213	2.6798	3.90348	9.48e-05	0.000304149
C21orf82	114036	1.42024	2.6763	12.2534	1.61e-34	3.45e-32
DAAM2	23500	1.41686	2.67003	9.02764	1.75e-19	5.95e-18
ENAM	10117	1.41578	2.66803	3.62571	0.000288168	0.000839667
ELMO1	9844	1.41539	2.66732	8.16241	3.28e-16	7.04e-15
AKR1E2	83592	1.41512	2.66682	8.41197	4.03e-17	9.88e-16
ASPA	443	1.41486	2.66634	8.54482	1.29e-17	3.44e-16
NQO1	1728	1.41431	2.66533	8.68215	3.88e-18	1.1e-16
CLMN	79789	1.4139	2.66456	11.6334	2.79e-31	4.23e-29
SNCB	6620	1.41242	2.66183	3.11032	0.00186886	0.00454115
CES1	1066	1.41036	2.65803	5.53864	3.05e-08	1.91e-07
PROX1	5629	1.41024	2.65782	7.85853	3.89e-15	7.12e-14
T	6862	1.40955	2.65655	2.88424	0.00392365	0.00883158
PGM5	5239	1.40947	2.65639	11.267	1.91e-29	2.24e-27
C15orf59	388135	1.40943	2.65632	7.74815	9.32e-15	1.61e-13
WDR65	149465	1.40924	2.65596	8.76684	1.84e-18	5.41e-17
RAPGEF4	11069	1.40795	2.65359	12.5791	2.75e-36	8.01e-34
SYNM	23336	1.4069	2.65166	13.2073	7.97e-40	4.42e-37
HIF3A	64344	1.4038	2.64597	8.5742	9.98e-18	2.69e-16
LRRC39	127495	1.4035	2.64543	7.28813	3.14e-13	4.32e-12
EMCN	51705	1.39835	2.636	12.2075	2.83e-34	5.85e-32
CD36	948	1.39828	2.63587	6.60467	3.98e-11	4.02e-10
RERG	85004	1.39789	2.63516	11.8562	2e-32	3.38e-30
ATP2B2	491	1.39391	2.6279	5.33807	9.39e-08	5.35e-07
DBX2	440097	1.39364	2.62741	3.4645	0.000531216	0.00145832
TSPAN7	7102	1.39358	2.6273	10.1966	2.05e-24	1.42e-22
NPY	4852	1.38796	2.61707	3.48122	0.00049913	0.00137812
RGS17	26575	1.38761	2.61645	5.91106	3.4e-09	2.51e-08
GALNTL1	57452	1.38753	2.6163	10.3995	2.49e-25	1.91e-23
KLHL38	340359	1.38733	2.61595	5.1614	2.45e-07	1.29e-06
PEAR1	375033	1.38484	2.61143	13.1043	3.11e-39	1.49e-36
ASXL3	80816	1.38408	2.61006	4.92154	8.59e-07	4.1e-06
ACSL6	23305	1.38317	2.60841	6.45262	1.1e-10	1.04e-09
RAP1GAP	5909	1.38279	2.60772	9.10137	8.92e-20	3.2e-18
WNT4	54361	1.3819	2.60611	5.81497	6.06e-09	4.31e-08
SUCNR1	56670	1.38058	2.60372	7.26357	3.77e-13	5.09e-12
MEOX2	4223	1.37927	2.60136	9.25418	2.16e-20	8.4e-19
ROBO4	54538	1.37919	2.60122	13.1685	1.33e-39	6.75e-37
PLVAP	83483	1.37789	2.59887	12.4039	2.49e-35	6.13e-33
ZP1	22917	1.376	2.59548	4.21856	2.46e-05	8.9e-05
HAND2	9464	1.37595	2.59538	6.06588	1.31e-09	1.04e-08
TMEM90B	79953	1.37445	2.59269	6.76873	1.3e-11	1.41e-10
FOXJ1	2302	1.37395	2.59179	4.78429	1.72e-06	7.73e-06
BVES	11149	1.36941	2.58366	9.28709	1.59e-20	6.31e-19
CETP	1071	1.36842	2.58188	7.2342	4.68e-13	6.24e-12
GFRA1	2674	1.36821	2.58151	6.03745	1.57e-09	1.22e-08
GPR20	2843	1.36766	2.58052	7.11216	1.14e-12	1.44e-11
OSR2	116039	1.36735	2.57996	6.79792	1.06e-11	1.17e-10
TMEM38A	79041	1.36686	2.57908	8.48403	2.18e-17	5.63e-16
NEXN	91624	1.36684	2.57905	10.3592	3.8e-25	2.83e-23
ERBB4	2066	1.3662	2.5779	7.92179	2.34e-15	4.44e-14
C1QTNF9B	387911	1.36553	2.57671	8.53594	1.39e-17	3.69e-16
TDGF1	6997	1.36539	2.57646	5.76867	7.99e-09	5.55e-08
BTBD11	121551	1.36532	2.57633	8.14315	3.85e-16	8.17e-15
TDGF3	6998	1.3647	2.57522	4.70524	2.54e-06	1.1e-05
PCDP1	200373	1.36185	2.57014	8.67656	4.08e-18	1.15e-16
TMEM88	92162	1.36089	2.56843	9.51076	1.89e-21	8.68e-20
PCDH19	57526	1.36083	2.56832	9.79031	1.24e-22	6.71e-21
LOC221122	221122	1.35903	2.56513	5.77068	7.9e-09	5.5e-08
HCN2	610	1.35898	2.56504	5.63341	1.77e-08	1.16e-07
PLAC1	10761	1.35853	2.56424	3.83974	0.000123165	0.000386411
OR7E37P	26636	1.35719	2.56186	4.81751	1.45e-06	6.66e-06
KLHL33	123103	1.35689	2.56133	5.18202	2.19e-07	1.17e-06
AVPR2	554	1.35598	2.5597	9.17795	4.39e-20	1.63e-18
ADAMTS16	170690	1.35563	2.55909	5.84461	5.08e-09	3.66e-08
SSTR1	6751	1.35428	2.5567	8.62869	6.21e-18	1.72e-16
?	553137	1.35409	2.55636	5.63107	1.79e-08	1.18e-07
C10orf107	219621	1.35364	2.55555	4.52406	6.07e-06	2.45e-05
RTN4RL1	146760	1.35338	2.5551	9.58016	9.69e-22	4.62e-20
SMR3A	26952	1.34999	2.5491	3.7217	0.000197884	0.000595969
WNT3A	89780	1.34895	2.54727	4.17415	2.99e-05	0.000106425
PPM1L	151742	1.34869	2.54681	8.66581	4.48e-18	1.26e-16
AKR1C2	1646	1.34805	2.54568	7.04995	1.79e-12	2.19e-11
STARD8	9754	1.34573	2.54158	15.0818	2.13e-51	5.41e-48
PLA2R1	22925	1.34447	2.53937	7.82534	5.06e-15	9.14e-14
TAL1	6886	1.34297	2.53673	12.3359	5.8e-35	1.39e-32
CLSTN2	64084	1.34223	2.53544	6.63315	3.29e-11	3.36e-10
SOX21	11166	1.34214	2.53527	4.13864	3.49e-05	0.000122371
C6orf105	84830	1.34143	2.53403	5.94774	2.72e-09	2.04e-08
PAMR1	25891	1.34141	2.53398	10.5852	3.49e-26	2.97e-24
SVEP1	79987	1.34007	2.53163	6.47404	9.54e-11	9.1e-10
FAM155B	27112	1.33744	2.52703	6.34955	2.16e-10	1.94e-09
FAM196B	100131897	1.3364	2.5252	3.69367	0.000221043	0.000659784
ADCY5	111	1.33548	2.52359	6.8367	8.1e-12	9.03e-11
DYNC1I1	1780	1.33112	2.51599	9.71983	2.48e-22	1.28e-20
VEPH1	79674	1.331	2.51578	7.43752	1.03e-13	1.51e-12
TMSB15A	11013	1.32952	2.51319	7.20933	5.62e-13	7.4e-12
PTGDS	5730	1.32906	2.51239	5.49455	3.92e-08	2.41e-07
LRRN4CL	221091	1.32889	2.51209	5.35186	8.71e-08	4.99e-07
KCNAB1	7881	1.32742	2.50953	5.55484	2.78e-08	1.76e-07
MYCT1	80177	1.3271	2.50897	13.22	6.73e-40	3.85e-37
EGR2	1959	1.32618	2.50738	7.32305	2.42e-13	3.38e-12
C3orf70	285382	1.32456	2.50456	12.3314	6.13e-35	1.45e-32
ENO3	2027	1.32416	2.50386	6.04238	1.52e-09	1.19e-08
SDPR	8436	1.3235	2.50273	9.55637	1.22e-21	5.73e-20
LOC388387	388387	1.31952	2.49582	4.99502	5.88e-07	2.9e-06
LOC157381	157381	1.3176	2.49252	4.83406	1.34e-06	6.18e-06
ENPEP	2028	1.31584	2.48948	10.1309	4.03e-24	2.64e-22
SLC43A1	8501	1.31294	2.48447	8.26556	1.39e-16	3.15e-15
NRXN2	9379	1.31255	2.48381	7.0048	2.47e-12	2.97e-11
IGF1	3479	1.31101	2.48115	6.42948	1.28e-10	1.19e-09
C10orf90	118611	1.31018	2.47973	3.30317	0.000955993	0.00247368
FTCD	10841	1.30943	2.47844	4.54684	5.45e-06	2.21e-05
CLCNKA	1187	1.30834	2.47657	4.75918	1.94e-06	8.64e-06
TNNT3	7140	1.30799	2.47596	4.10088	4.12e-05	0.000141869
COL23A1	91522	1.30675	2.47383	6.30816	2.82e-10	2.49e-09
MB	4151	1.30632	2.47311	6.02724	1.67e-09	1.29e-08
GJB6	10804	1.30523	2.47123	6.4681	9.92e-11	9.45e-10
SLITRK5	26050	1.30342	2.46813	4.77033	1.84e-06	8.21e-06
CALCA	796	1.3032	2.46775	3.0876	0.00201778	0.00486968
TBXA2R	6915	1.30222	2.46609	11.2761	1.72e-29	2.04e-27
REEP1	65055	1.30151	2.46486	8.39214	4.77e-17	1.16e-15
GABRR1	2569	1.3	2.4623	3.78297	0.000154968	0.000478492
TRPM5	29850	1.29836	2.4595	5.79965	6.65e-09	4.69e-08
AR	367	1.29668	2.45664	6.30574	2.87e-10	2.53e-09
MYH15	22989	1.29645	2.45624	5.43914	5.35e-08	3.2e-07
LRRC70	100130733	1.29617	2.45576	12.1572	5.26e-34	1.05e-31
SYT15	83849	1.29561	2.45481	10.7773	4.41e-27	4.16e-25
B3GALT1	8708	1.29148	2.44779	4.65299	3.27e-06	1.39e-05
FZD9	8326	1.28906	2.44368	6.84874	7.45e-12	8.35e-11
CNN1	1264	1.28882	2.44329	8.35528	6.53e-17	1.56e-15
CLEC3B	7123	1.28846	2.44267	9.27391	1.79e-20	7.09e-19
PPAP2A	8611	1.28844	2.44263	13.3224	1.72e-40	1.01e-37
GRIA1	2890	1.28483	2.43654	3.15656	0.00159641	0.0039346
SLC16A2	6567	1.28478	2.43645	8.74633	2.2e-18	6.44e-17
OIT3	170392	1.28359	2.43443	7.19678	6.17e-13	8.06e-12
CHRNA9	55584	1.28358	2.43443	5.43358	5.52e-08	3.29e-07
TDRD1	56165	1.28323	2.43383	4.40113	1.08e-05	4.16e-05
SLC14A1	6563	1.2828	2.43311	7.05844	1.68e-12	2.07e-11
TUBA8	51807	1.2828	2.4331	10.1719	2.65e-24	1.79e-22
HBA2	3040	1.28079	2.42973	7.04231	1.89e-12	2.3e-11
PCSK6	5046	1.27867	2.42615	8.47264	2.4e-17	6.11e-16
SPATA4	132851	1.27788	2.42482	7.90109	2.76e-15	5.18e-14
CNTN2	6900	1.27612	2.42187	5.29218	1.21e-07	6.74e-07
CA2	760	1.27489	2.4198	10.1441	3.52e-24	2.33e-22
PDLIM3	27295	1.27272	2.41617	8.24191	1.69e-16	3.78e-15
PNMA3	29944	1.27232	2.4155	7.68734	1.5e-14	2.5e-13
PAH	5053	1.27219	2.41528	5.13329	2.85e-07	1.49e-06
FAM124A	220108	1.27202	2.415	8.10654	5.21e-16	1.08e-14
TMEM84	283673	1.27102	2.41333	6.05785	1.38e-09	1.09e-08
LRRTM1	347730	1.27041	2.41231	4.09583	4.21e-05	0.000144745
GPM6A	2823	1.26932	2.41048	6.39206	1.64e-10	1.5e-09
C3orf36	80111	1.26843	2.409	11.0199	3.06e-28	3.21e-26
HECW2	57520	1.26751	2.40745	11.6134	3.52e-31	5.21e-29
CSMD2	114784	1.26448	2.40241	7.60274	2.9e-14	4.64e-13
TM4SF18	116441	1.26436	2.4022	11.1652	6.03e-29	6.69e-27
CALCRL	10203	1.25711	2.39016	11.7581	6.41e-32	1.03e-29
C14orf176	643382	1.25656	2.38926	8.78602	1.55e-18	4.62e-17
LAMC3	10319	1.2563	2.38883	5.7053	1.16e-08	7.85e-08
MATN2	4147	1.25614	2.38855	8.164	3.24e-16	6.96e-15
ADAMTSL2	9719	1.25544	2.3874	11.2949	1.39e-29	1.68e-27
LHCGR	3973	1.25512	2.38687	3.42062	0.000624774	0.00168211
LDB3	11155	1.25461	2.38602	8.27237	1.31e-16	2.99e-15
MT1G	4495	1.25457	2.38597	3.5972	0.000321662	0.000927667
BCMO1	53630	1.25455	2.38592	3.79204	0.000149414	0.000462792
FOXP2	93986	1.25441	2.38569	5.18104	2.21e-07	1.17e-06
KIRREL2	84063	1.25343	2.38408	4.10665	4.01e-05	0.000138561
PDE3A	5139	1.25288	2.38316	7.60046	2.95e-14	4.71e-13
PF4	5196	1.25249	2.38253	3.54496	0.000392673	0.0011108
VSX1	30813	1.25228	2.38217	4.49115	7.08e-06	2.82e-05
HBA1	3039	1.25197	2.38167	5.10533	3.3e-07	1.7e-06
SLC26A7	115111	1.25196	2.38164	5.83558	5.36e-09	3.85e-08
DOK6	220164	1.25041	2.37909	7.82812	4.95e-15	8.98e-14
MYLK2	85366	1.24927	2.37721	5.95282	2.64e-09	1.98e-08
CDK15	65061	1.249	2.37677	3.15025	0.00163129	0.00401167
FBXL21	26223	1.24782	2.37482	3.94718	7.91e-05	0.00025827
OR7C1	26664	1.24781	2.3748	4.55544	5.23e-06	2.13e-05
LOC285205	285205	1.24504	2.37026	4.15463	3.26e-05	0.000115055
CRTAC1	55118	1.24165	2.36469	6.64394	3.05e-11	3.14e-10
PNPLA1	285848	1.24116	2.36388	3.97839	6.94e-05	0.000229443
C14orf86	283592	1.2411	2.36379	5.40161	6.6e-08	3.87e-07
C3orf32	51066	1.24107	2.36374	6.68635	2.29e-11	2.4e-10
CYP11A1	1583	1.24094	2.36353	4.23755	2.26e-05	8.25e-05
GABRD	2563	1.24001	2.362	8.17986	2.84e-16	6.2e-15
ANK2	287	1.23884	2.36009	6.32553	2.52e-10	2.25e-09
ESRRB	2103	1.23776	2.35832	5.12557	2.97e-07	1.54e-06
MYBPC1	4604	1.23549	2.35462	5.30016	1.16e-07	6.48e-07
THBD	7056	1.23548	2.3546	13.4618	2.62e-41	1.79e-38
SLC1A1	6505	1.23052	2.34651	7.2985	2.91e-13	4.01e-12
ZNF366	167465	1.22995	2.34559	8.57601	9.82e-18	2.65e-16
FLJ35024	401491	1.22881	2.34373	6.43079	1.27e-10	1.18e-09
CAMK2A	815	1.22851	2.34324	5.15603	2.52e-07	1.33e-06
GABRB3	2562	1.22785	2.34217	5.20728	1.92e-07	1.03e-06
GNAI1	2770	1.22643	2.33987	10.3796	3.07e-25	2.31e-23
NCAN	1463	1.22432	2.33646	5.81569	6.04e-09	4.3e-08
COL4A6	1288	1.22424	2.33633	6.12597	9.01e-10	7.34e-09
ATP1A3	478	1.22378	2.33558	4.438	9.08e-06	3.55e-05
EGF	1950	1.22146	2.33183	5.96423	2.46e-09	1.86e-08
LDB2	9079	1.22079	2.33074	12.7998	1.64e-37	6.21e-35
FOSB	2354	1.22065	2.33052	4.7491	2.04e-06	9.06e-06
CABP1	9478	1.21697	2.32458	6.60085	4.09e-11	4.11e-10
PDE4D	5144	1.21623	2.32339	9.90355	4.02e-23	2.33e-21
HES7	84667	1.21599	2.32301	6.21752	5.05e-10	4.28e-09
FOXF2	2295	1.21454	2.32067	6.06545	1.32e-09	1.04e-08
CACNA2D3	55799	1.21447	2.32055	5.73708	9.63e-09	6.6e-08
APOL5	80831	1.21411	2.31997	4.93003	8.22e-07	3.94e-06
KCNA5	3741	1.21377	2.31942	7.09715	1.27e-12	1.59e-11
KLF2	10365	1.21314	2.31842	9.55824	1.2e-21	5.65e-20
ADAM22	53616	1.21221	2.31693	5.97087	2.36e-09	1.79e-08
VWF	7450	1.212	2.31658	9.68942	3.34e-22	1.7e-20
ADD2	119	1.21105	2.31506	5.60413	2.09e-08	1.35e-07
TTYH2	94015	1.21092	2.31485	9.7497	1.85e-22	9.74e-21
LOC90246	90246	1.21071	2.31452	10.1914	2.17e-24	1.5e-22
GPR37L1	9283	1.20956	2.31266	5.48504	4.13e-08	2.53e-07
CHRNB4	1143	1.20883	2.3115	6.23418	4.54e-10	3.87e-09
EFHB	151651	1.20864	2.31119	6.93405	4.09e-12	4.78e-11
GP9	2815	1.20667	2.30804	3.65924	0.000252962	0.000745034
RNF150	57484	1.20553	2.30623	7.6065	2.82e-14	4.53e-13
SLC26A9	115019	1.20433	2.3043	6.9736	3.09e-12	3.65e-11
GPR182	11318	1.20319	2.30248	5.60533	2.08e-08	1.35e-07
SMTNL2	342527	1.20246	2.30132	5.08065	3.76e-07	1.92e-06
CCL14	6358	1.20135	2.29954	7.3822	1.56e-13	2.24e-12
ANGPTL5	253935	1.19982	2.29711	4.76433	1.89e-06	8.44e-06
TBX2	6909	1.19912	2.296	7.08209	1.42e-12	1.76e-11
PTPRT	11122	1.19825	2.29461	4.06777	4.75e-05	0.000161568
SYBU	55638	1.19689	2.29245	9.63713	5.57e-22	2.72e-20
ADCYAP1R1	117	1.1961	2.29119	3.50005	0.000465166	0.00129401
PRRG3	79057	1.19556	2.29034	4.65144	3.3e-06	1.4e-05
ITGA8	8516	1.19544	2.29015	6.60842	3.88e-11	3.92e-10
KCNE3	10008	1.19419	2.28816	8.36789	5.87e-17	1.4e-15
MGAT5B	146664	1.19295	2.2862	6.64626	3.01e-11	3.09e-10
HIST1H4H	8365	1.19166	2.28415	7.30428	2.79e-13	3.87e-12
PCDH12	51294	1.18945	2.28066	11.8978	1.22e-32	2.18e-30
ODF3L1	161753	1.18548	2.27439	5.028	4.96e-07	2.47e-06
HMGCLL1	54511	1.18542	2.2743	5.72098	1.06e-08	7.21e-08
DLL3	10683	1.1853	2.27411	4.14319	3.43e-05	0.000120327
KATNAL2	83473	1.18422	2.27241	7.43776	1.02e-13	1.51e-12
CTNNA2	1496	1.18413	2.27227	3.4822	0.000497312	0.00137374
SGCA	6442	1.1841	2.27221	6.45182	1.11e-10	1.04e-09
RUNX1T1	862	1.18372	2.27162	7.77617	7.48e-15	1.31e-13
PRKCA	5578	1.18302	2.27051	8.38537	5.06e-17	1.22e-15
CASP12	120329	1.18257	2.26981	6.20562	5.45e-10	4.6e-09
GIMAP8	155038	1.18252	2.26973	12.7588	2.78e-37	9.69e-35
LIMS2	55679	1.18208	2.26904	12.447	1.45e-35	3.85e-33
PNMA5	114824	1.18182	2.26863	4.18507	2.85e-05	0.000101821
C6orf186	728464	1.17963	2.26519	4.62758	3.7e-06	1.55e-05
TBX22	50945	1.17823	2.26298	3.54944	0.000386055	0.00109435
LRRC67	286187	1.17645	2.2602	5.6466	1.64e-08	1.08e-07
OMD	4958	1.17599	2.25948	4.17847	2.93e-05	0.000104547
JAM2	58494	1.17598	2.25947	11.1976	4.19e-29	4.77e-27
TRPC6	7225	1.17563	2.25891	9.68558	3.47e-22	1.76e-20
PREX2	80243	1.17539	2.25853	6.15338	7.58e-10	6.23e-09
GLP1R	2740	1.17531	2.25842	3.82938	0.000128464	0.000402113
FAM81A	145773	1.17474	2.25752	8.44158	3.13e-17	7.77e-16
PODXL	5420	1.17362	2.25576	14.2785	2.98e-46	3.11e-43
C10orf108	414235	1.17346	2.25552	5.45554	4.88e-08	2.94e-07
FOXF1	2294	1.17297	2.25476	9.06559	1.24e-19	4.33e-18
KIF26A	26153	1.17233	2.25375	10.5643	4.36e-26	3.69e-24
ANGPTL1	9068	1.17214	2.25345	8.00618	1.18e-15	2.32e-14
SOX10	6663	1.17206	2.25333	3.7802	0.000156702	0.000483341
MYOM1	8736	1.16787	2.24679	9.03407	1.65e-19	5.65e-18
FAM65C	140876	1.16692	2.24532	6.44427	1.16e-10	1.09e-09
CKB	1152	1.16593	2.24378	7.93209	2.15e-15	4.1e-14
GATA2	2624	1.16507	2.24244	11.1437	7.69e-29	8.42e-27
PDZD4	57595	1.16427	2.2412	9.40161	5.37e-21	2.29e-19
LOC283070	283070	1.16376	2.2404	11.5102	1.17e-30	1.59e-28
LRRC3B	116135	1.16331	2.23971	4.7243	2.31e-06	1.01e-05
FAM19A5	25817	1.16271	2.23878	7.4318	1.07e-13	1.58e-12
FER1L5	90342	1.16256	2.23855	4.89359	9.9e-07	4.68e-06
SNTG2	54221	1.16239	2.23827	6.70095	2.07e-11	2.19e-10
ADRA1D	146	1.1622	2.23799	6.74376	1.54e-11	1.66e-10
GPIHBP1	338328	1.16159	2.23704	7.07373	1.51e-12	1.87e-11
PTPRR	5801	1.16092	2.236	8.45077	2.89e-17	7.24e-16
C1QTNF9	338872	1.1606	2.23551	6.86943	6.45e-12	7.29e-11
FCGBP	8857	1.16033	2.23508	7.3509	1.97e-13	2.79e-12
RFTN2	130132	1.1601	2.23472	11.2995	1.32e-29	1.6e-27
DEFB131	644414	1.1599	2.23442	3.65035	0.00026188	0.000768746
CYP46A1	10858	1.15771	2.23103	7.54238	4.61e-14	7.18e-13
HBG1	3047	1.15651	2.22918	3.53652	0.000405441	0.00114346
GPR17	2840	1.15616	2.22863	7.19255	6.36e-13	8.3e-12
OLFM2	93145	1.15566	2.22786	5.91501	3.32e-09	2.46e-08
MYOT	9499	1.15498	2.22681	4.54855	5.4e-06	2.2e-05
C6orf165	154313	1.15457	2.22617	8.82306	1.11e-18	3.37e-17
SLC35F4	341880	1.15306	2.22386	3.33951	0.00083925	0.00219561
RGS16	6004	1.15117	2.22093	8.44867	2.95e-17	7.36e-16
MPP2	4355	1.15014	2.21936	8.90086	5.54e-19	1.76e-17
FAM5C	339479	1.15011	2.21931	4.68989	2.73e-06	1.18e-05
NPR1	4881	1.14952	2.2184	10.4626	1.28e-25	1.02e-23
CPXM1	56265	1.14856	2.21693	4.79295	1.64e-06	7.44e-06
GNA14	9630	1.14832	2.21655	7.06936	1.56e-12	1.92e-11
RPS6KL1	83694	1.14826	2.21646	8.48342	2.19e-17	5.64e-16
C19orf69	100170765	1.14739	2.21513	3.9622	7.43e-05	0.000243854
ZIM2	23619	1.14735	2.21506	4.81768	1.45e-06	6.65e-06
SFRP5	6425	1.14501	2.21148	2.93412	0.0033449	0.00765116
MSI1	4440	1.14269	2.20792	4.16385	3.13e-05	0.000111031
NEK10	152110	1.1421	2.20702	6.01521	1.8e-09	1.39e-08
NCAM1	4684	1.14207	2.20698	5.43472	5.49e-08	3.27e-07
SLC27A4	10999	1.14156	2.2062	6.78354	1.17e-11	1.28e-10
NOTCH4	4855	1.14148	2.20608	11.8823	1.46e-32	2.57e-30
WDR16	146845	1.14112	2.20552	6.05519	1.4e-09	1.11e-08
TBX15	6913	1.14024	2.20418	8.09854	5.56e-16	1.15e-14
TXNDC3	51314	1.13996	2.20376	4.13518	3.55e-05	0.000123913
ABCC4	10257	1.13947	2.203	6.32785	2.49e-10	2.22e-09
NMB	4828	1.13899	2.20227	6.61024	3.84e-11	3.88e-10
EMX2	2018	1.13875	2.2019	4.6051	4.12e-06	1.72e-05
CXXC4	80319	1.13586	2.1975	5.64745	1.63e-08	1.08e-07
IL13RA2	3598	1.13585	2.19748	5.61195	2e-08	1.3e-07
DEPDC6	64798	1.13541	2.1968	8.26247	1.43e-16	3.22e-15
HSD11B2	3291	1.13477	2.19584	5.46978	4.51e-08	2.73e-07
COX4I2	84701	1.13284	2.1929	6.89342	5.45e-12	6.22e-11
EMILIN3	90187	1.13207	2.19173	5.53104	3.18e-08	1.99e-07
WBSCR17	64409	1.13025	2.18897	5.84869	4.95e-09	3.57e-08
C4orf22	255119	1.12949	2.18781	3.50257	0.000460786	0.00128283
LGI4	163175	1.12911	2.18724	8.0068	1.18e-15	2.31e-14
LRGUK	136332	1.12733	2.18455	5.22137	1.78e-07	9.56e-07
ABCB1	5243	1.12694	2.18395	9.24651	2.32e-20	8.93e-19
KCTD8	386617	1.12669	2.18357	5.50182	3.76e-08	2.32e-07
PEG3	5178	1.12657	2.18339	8.82347	1.11e-18	3.37e-17
SLC38A3	10991	1.12491	2.18089	4.86227	1.16e-06	5.43e-06
NEGR1	257194	1.1243	2.17996	6.48229	9.03e-11	8.68e-10
CDH2	1000	1.12372	2.17908	5.43583	5.45e-08	3.26e-07
ENKUR	219670	1.12327	2.1784	6.02178	1.73e-09	1.33e-08
IQGAP2	10788	1.12247	2.17719	6.49331	8.4e-11	8.1e-10
C19orf51	352909	1.12242	2.17711	7.0957	1.29e-12	1.61e-11
CCBE1	147372	1.12147	2.17569	3.64753	0.000264769	0.000776458
HSPB7	27129	1.12139	2.17557	4.72074	2.35e-06	1.03e-05
PGAM2	5224	1.12122	2.17531	5.71467	1.1e-08	7.47e-08
BMX	660	1.11954	2.17278	7.42768	1.11e-13	1.62e-12
C16orf89	146556	1.11934	2.17248	6.74376	1.54e-11	1.66e-10
SEMA3G	56920	1.11872	2.17154	10.9517	6.52e-28	6.65e-26
BCL6B	255877	1.11848	2.17118	10.752	5.8e-27	5.39e-25
CCKBR	887	1.11787	2.17027	5.35769	8.43e-08	4.85e-07
NOL4	8715	1.11721	2.16927	3.65056	0.000261672	0.000768519
ISLR2	57611	1.11631	2.16791	7.24435	4.35e-13	5.8e-12
MMRN1	22915	1.11586	2.16724	6.25417	4e-10	3.44e-09
COLEC10	10584	1.11503	2.166	5.69222	1.25e-08	8.44e-08
LRRC7	57554	1.1147	2.1655	5.10762	3.26e-07	1.68e-06
GIPC3	126326	1.11451	2.16522	9.66698	4.16e-22	2.08e-20
MAP1A	4130	1.11423	2.1648	8.96595	3.08e-19	1.01e-17
INPP5J	27124	1.11395	2.16438	8.95027	3.55e-19	1.16e-17
CBLN2	147381	1.11339	2.16353	3.03207	0.0024288	0.00574981
LOC285456	285456	1.11259	2.16234	5.84358	5.11e-09	3.68e-08
OR7A5	26659	1.11199	2.16143	3.5358	0.000406547	0.00114639
MMRN2	79812	1.11164	2.16091	14.5258	8.32e-48	9.84e-45
KY	339855	1.11099	2.15993	6.07941	1.21e-09	9.66e-09
ARHGEF15	22899	1.1108	2.15965	11.6147	3.47e-31	5.18e-29
EML1	2009	1.11051	2.15922	11.0134	3.29e-28	3.42e-26
LOC158376	158376	1.11024	2.15881	9.31304	1.24e-20	5e-19
SH3GL3	6457	1.11007	2.15856	3.34984	0.00080858	0.00212194
SRCRB4D	136853	1.10953	2.15775	5.43089	5.61e-08	3.34e-07
SCUBE3	222663	1.1068	2.15367	6.40432	1.51e-10	1.39e-09
ACOT6	641372	1.10676	2.15362	4.84453	1.27e-06	5.89e-06
C20orf160	140706	1.10588	2.15231	10.5866	3.44e-26	2.93e-24
ZCCHC16	340595	1.1058	2.15218	4.00179	6.29e-05	0.000210118
WT1	7490	1.10486	2.15078	3.29683	0.000977839	0.00252505
ITPR1	3708	1.10449	2.15023	6.51026	7.5e-11	7.28e-10
CDH8	1006	1.10374	2.14911	5.35714	8.45e-08	4.86e-07
KCNN1	3780	1.10356	2.14885	4.45732	8.3e-06	3.27e-05
ZEB1	6935	1.10289	2.14784	12.6393	1.28e-36	3.99e-34
BAI1	575	1.10183	2.14627	4.72472	2.3e-06	1.01e-05
TTLL7	79739	1.10139	2.14561	6.0497	1.45e-09	1.14e-08
SH2D4B	387694	1.10127	2.14543	5.87273	4.29e-09	3.12e-08
EXOC3L	283849	1.10074	2.14464	10.5435	5.44e-26	4.53e-24
ANO3	63982	1.10009	2.14368	6.31229	2.75e-10	2.43e-09
SLC29A4	222962	1.09962	2.14299	5.27048	1.36e-07	7.49e-07
PURG	29942	1.09835	2.1411	6.68665	2.28e-11	2.4e-10
DDX25	29118	1.09569	2.13715	6.15884	7.33e-10	6.04e-09
ST8SIA6	338596	1.09526	2.13652	5.3046	1.13e-07	6.34e-07
SEMA6D	80031	1.09522	2.13646	6.76567	1.33e-11	1.44e-10
PSAT1	29968	1.09373	2.13426	5.41422	6.16e-08	3.63e-07
C1orf192	257177	1.09326	2.13356	8.25592	1.51e-16	3.39e-15
NR0B2	8431	1.09259	2.13257	3.51832	0.000434284	0.00121553
F2RL3	9002	1.09245	2.13235	6.33616	2.36e-10	2.11e-09
HOXA4	3201	1.09014	2.12895	9.50432	2.01e-21	9.16e-20
PLCH1	23007	1.08888	2.12709	5.81703	5.99e-09	4.26e-08
FIBIN	387758	1.0885	2.12653	5.11065	3.21e-07	1.66e-06
ATP6V0E2	155066	1.08774	2.12541	8.06407	7.38e-16	1.5e-14
TRIM58	25893	1.08769	2.12534	7.02708	2.11e-12	2.55e-11
KCNK3	3777	1.08745	2.12499	6.08315	1.18e-09	9.44e-09
KITLG	4254	1.08724	2.12466	9.5901	8.8e-22	4.21e-20
HTR1F	3355	1.08606	2.12293	8.35087	6.78e-17	1.61e-15
CCDC3	83643	1.08565	2.12233	8.39971	4.48e-17	1.09e-15
OTOR	56914	1.08514	2.12158	3.73839	0.000185199	0.000561577
CD34	947	1.08466	2.12088	11.9025	1.15e-32	2.08e-30
AGBL4	84871	1.08444	2.12056	7.85554	3.98e-15	7.26e-14
GRRP1	79927	1.08418	2.12018	8.95179	3.5e-19	1.15e-17
LOC80054	80054	1.08399	2.11989	6.93955	3.93e-12	4.6e-11
SLC10A4	201780	1.08335	2.11895	6.36418	1.96e-10	1.78e-09
LDHAL6A	160287	1.08201	2.11699	3.50975	0.00044853	0.00125264
CYYR1	116159	1.08193	2.11686	11.9835	4.33e-33	7.93e-31
RASIP1	54922	1.08139	2.11608	10.7955	3.62e-27	3.47e-25
ADAMTS9	56999	1.08058	2.11488	7.20869	5.65e-13	7.43e-12
SLC39A14	23516	1.08032	2.1145	10.8103	3.08e-27	2.98e-25
PODN	127435	1.07993	2.11394	5.20779	1.91e-07	1.02e-06
SH3BP5	9467	1.07886	2.11236	13.8191	1.96e-43	1.51e-40
GRB10	2887	1.07806	2.1112	13.6489	2.05e-42	1.52e-39
MSRB3	253827	1.07803	2.11114	12.2566	1.55e-34	3.39e-32
SLITRK3	22865	1.07767	2.11062	4.02518	5.69e-05	0.000191771
FMO2	2327	1.07739	2.11022	5.11527	3.13e-07	1.62e-06
ROPN1L	83853	1.0761	2.10833	6.0961	1.09e-09	8.78e-09
CLEC14A	161198	1.07582	2.10792	12.4341	1.71e-35	4.39e-33
GABRA5	2558	1.0758	2.10789	3.94389	8.02e-05	0.000261407
MRVI1	10335	1.07565	2.10767	11.476	1.74e-30	2.32e-28
NDRG2	57447	1.07521	2.10703	11.7486	7.18e-32	1.15e-29
FGFBP2	83888	1.07465	2.1062	5.75758	8.53e-09	5.9e-08
ERG	2078	1.07426	2.10564	12.2546	1.59e-34	3.43e-32
ALDH1B1	219	1.07356	2.10462	9.09654	9.33e-20	3.33e-18
FBXO17	115290	1.07318	2.10407	8.28056	1.23e-16	2.81e-15
CHP2	63928	1.07179	2.10203	2.95267	0.00315043	0.00724998
USHBP1	83878	1.07096	2.10083	9.41574	4.7e-21	2.02e-19
CPNE6	9362	1.07033	2.09991	3.47538	0.000510138	0.00140567
EMID1	129080	1.06901	2.09799	5.48981	4.02e-08	2.47e-07
PLEKHG4B	153478	1.06867	2.0975	4.50235	6.72e-06	2.69e-05
NEFL	4747	1.06832	2.097	3.86514	0.000111024	0.000351617
TRIB3	57761	1.06801	2.09654	4.93237	8.12e-07	3.9e-06
IP6K3	117283	1.06723	2.0954	5.08126	3.75e-07	1.91e-06
NUPR1	26471	1.06513	2.09237	5.46284	4.69e-08	2.83e-07
FRK	2444	1.06507	2.09228	6.24156	4.33e-10	3.7e-09
AOC2	314	1.06492	2.09205	8.18743	2.67e-16	5.84e-15
ADAMTS8	11095	1.06487	2.09198	7.23213	4.75e-13	6.32e-12
SLC1A7	6512	1.06392	2.09061	4.78332	1.72e-06	7.76e-06
CXorf36	79742	1.06279	2.08897	12.2626	1.44e-34	3.19e-32
PTPRB	5787	1.06273	2.08887	11.6812	1.59e-31	2.45e-29
EFR3B	22979	1.0622	2.08811	9.76423	1.6e-22	8.49e-21
RCOR2	283248	1.05906	2.08357	6.31962	2.62e-10	2.33e-09
PDGFRB	5159	1.05546	2.07838	9.56749	1.1e-21	5.18e-20
TEK	7010	1.05527	2.07811	11.2383	2.65e-29	3.09e-27
LOC645752	645752	1.05526	2.07809	3.50515	0.000456349	0.00127167
TCF7L1	83439	1.05472	2.07731	6.43874	1.2e-10	1.13e-09
ME1	4199	1.0541	2.07643	7.76177	8.38e-15	1.45e-13
NBEA	26960	1.05321	2.07515	7.7296	1.08e-14	1.84e-13
APOE	348	1.05262	2.0743	4.91334	8.95e-07	4.27e-06
C1QTNF7	114905	1.05199	2.07339	5.9454	2.76e-09	2.07e-08
CACNA1C	775	1.05178	2.07308	9.65477	4.69e-22	2.32e-20
DDR2	4921	1.05108	2.07209	6.24689	4.19e-10	3.59e-09
CTNNA3	29119	1.05097	2.07192	3.40352	0.000665247	0.00177974
NOVA2	4858	1.05067	2.07149	8.66567	4.49e-18	1.26e-16
SMTN	6525	1.04916	2.06932	11.5996	4.14e-31	6.07e-29
LRRC4B	94030	1.04806	2.06774	7.49736	6.51e-14	9.87e-13
VWA5B2	90113	1.04788	2.06749	6.44874	1.13e-10	1.06e-09
LOC100132354	100132354	1.04786	2.06745	4.01603	5.92e-05	0.000198822
ZNF521	25925	1.04745	2.06688	8.41621	3.89e-17	9.56e-16
RASL10B	91608	1.04736	2.06674	6.33243	2.41e-10	2.16e-09
HSPC072	29075	1.04653	2.06555	3.30058	0.000964849	0.0024955
LOH3CR2A	29931	1.0463	2.06522	8.08764	6.08e-16	1.25e-14
P2RY8	286530	1.04562	2.06425	9.34662	9.05e-21	3.74e-19
CCDC65	85478	1.04546	2.06403	8.59814	8.1e-18	2.2e-16
C16orf71	146562	1.04392	2.06183	7.3634	1.79e-13	2.55e-12
ELN	2006	1.04377	2.0616	8.06245	7.48e-16	1.52e-14
C22orf15	150248	1.04202	2.05911	4.1105	3.95e-05	0.000136484
EPHA3	2042	1.04152	2.05839	7.61518	2.63e-14	4.25e-13
PDK4	5166	1.04103	2.0577	5.18753	2.13e-07	1.14e-06
KIAA1409	57578	1.04008	2.05633	7.65408	1.95e-14	3.19e-13
AFAP1L1	134265	1.03997	2.05618	11.1679	5.85e-29	6.53e-27
FAM198B	51313	1.03992	2.05611	10.5986	3.02e-26	2.61e-24
KCNIP1	30820	1.03987	2.05604	3.74133	0.000183046	0.000555713
KCNK2	3776	1.03953	2.05556	4.83401	1.34e-06	6.18e-06
KLHL4	56062	1.03929	2.05521	6.49833	8.12e-11	7.86e-10
RARB	5915	1.03921	2.0551	10.0074	1.41e-23	8.68e-22
FLJ10357	55701	1.03909	2.05493	12.8948	4.82e-38	1.99e-35
ACE	1636	1.0388	2.05452	9.05354	1.38e-19	4.79e-18
TSNAXIP1	55815	1.03735	2.05246	5.09338	3.52e-07	1.81e-06
ITGA1	3672	1.03643	2.05115	9.61725	6.76e-22	3.27e-20
SERHL2	253190	1.0362	2.05082	5.37506	7.66e-08	4.43e-07
WNK2	65268	1.03613	2.05073	6.26258	3.79e-10	3.28e-09
TMEM63C	57156	1.03552	2.04986	6.65573	2.82e-11	2.92e-10
GCSH	2653	1.03541	2.04969	7.34342	2.08e-13	2.94e-12
LMX1A	4009	1.03515	2.04932	2.98852	0.00280334	0.00652936
KIAA1467	57613	1.03473	2.04873	8.88271	6.53e-19	2.05e-17
GYG2	8908	1.03462	2.04857	6.93496	4.06e-12	4.75e-11
RNASE13	440163	1.03386	2.04749	4.20535	2.61e-05	9.39e-05
CYP27B1	1594	1.02967	2.04155	6.91864	4.56e-12	5.29e-11
YBX2	51087	1.02869	2.04018	6.02746	1.67e-09	1.29e-08
FAM171B	165215	1.02772	2.03881	6.1805	6.39e-10	5.32e-09
HECW1	23072	1.02769	2.03876	3.77094	0.000162634	0.000499815
FAM19A4	151647	1.02762	2.03866	3.39766	0.00067964	0.00181414
FAM26E	254228	1.02754	2.03855	10.9315	8.15e-28	8.17e-26
GPR3	2827	1.02727	2.03816	7.91219	2.53e-15	4.77e-14
LOC283731	283731	1.02585	2.03615	4.6716	2.99e-06	1.28e-05
AQP4	361	1.02557	2.03577	4.50211	6.73e-06	2.69e-05
HBG2	3048	1.02549	2.03566	3.25107	0.00114971	0.00292421
HSPA12B	116835	1.02541	2.03554	11.0639	1.88e-28	1.99e-26
TMEM150C	441027	1.02437	2.03407	9.85922	6.25e-23	3.53e-21
PIWIL2	55124	1.0227	2.03171	4.83623	1.32e-06	6.11e-06
JPH2	57158	1.02232	2.03118	6.8355	8.17e-12	9.1e-11
CALCB	797	1.02224	2.03107	3.26072	0.00111128	0.00283172
HIST1H2BC	8347	1.02115	2.02954	6.73857	1.6e-11	1.71e-10
CSPG4	1464	1.02018	2.02817	8.9161	4.83e-19	1.55e-17
ELAVL3	1995	1.01964	2.02741	2.99097	0.00278094	0.00648004
RAMP3	10268	1.0188	2.02623	8.86336	7.76e-19	2.42e-17
LRRC32	2615	1.01823	2.02543	9.55752	1.21e-21	5.68e-20
FZD4	8322	1.01756	2.0245	13.3465	1.24e-40	7.6e-38
NTS	4922	1.01693	2.02361	3.0073	0.00263577	0.0061873
GPR4	2828	1.01597	2.02226	10.6133	2.58e-26	2.24e-24
EPHB1	2047	1.01587	2.02212	6.07835	1.21e-09	9.7e-09
KIAA2022	340533	1.01577	2.02199	6.42248	1.34e-10	1.24e-09
GHR	2690	1.01384	2.01928	8.20488	2.31e-16	5.09e-15
MYOM3	127294	1.01362	2.01897	6.76003	1.38e-11	1.49e-10
LIPC	3990	1.01218	2.01696	4.10858	3.98e-05	0.000137463
RASL12	51285	1.01151	2.01602	9.34258	9.4e-21	3.88e-19
RBPMS2	348093	1.01083	2.01508	9.68623	3.45e-22	1.75e-20
PCSK1	5122	1.01047	2.01457	5.18628	2.15e-07	1.14e-06
TCEAL2	140597	1.00984	2.01369	4.14163	3.45e-05	0.000121026
C3orf55	152078	1.00966	2.01344	5.5498	2.86e-08	1.8e-07
ARHGAP24	83478	1.00937	2.01304	5.93131	3.01e-09	2.24e-08
DPF3	8110	1.00913	2.0127	9.12076	7.46e-20	2.69e-18
FCN3	8547	1.00885	2.0123	6.48547	8.85e-11	8.51e-10
PAPSS2	9060	1.00823	2.01144	6.69988	2.09e-11	2.2e-10
CDH13	1012	1.0081	2.01125	9.12688	7.05e-20	2.55e-18
LOC342346	342346	1.00627	2.00871	6.51981	7.04e-11	6.86e-10
PTGER3	5733	1.00413	2.00573	7.79903	6.24e-15	1.11e-13
C20orf26	26074	1.00368	2.00511	6.05543	1.4e-09	1.11e-08
ADAM33	80332	1.00358	2.00497	5.44165	5.28e-08	3.17e-07
FIGF	2277	1.00252	2.00349	4.69111	2.72e-06	1.18e-05
GRASP	160622	1.0023	2.00319	9.71766	2.54e-22	1.31e-20
GIMAP6	474344	1.00204	2.00283	11.082	1.53e-28	1.65e-26
RGS6	9628	1.00194	2.00269	9.77192	1.49e-22	7.92e-21
CLDN5	7122	1.00115	2.0016	6.68289	2.34e-11	2.45e-10
PGF	5228	1.00111	2.00153	5.4019	6.59e-08	3.86e-07
CPA3	1359	1.0001	2.00014	3.53968	0.000400608	0.00113108
ADRA2C	152	0.999591	1.99943	5.41181	6.24e-08	3.67e-07
PALMD	54873	0.999429	1.99921	10.6802	1.26e-26	1.13e-24
LY6K	54742	0.998949	1.99854	5.41449	6.15e-08	3.62e-07
CECR2	27443	0.998083	1.99734	4.25367	2.1e-05	7.71e-05
ACTC1	70	0.998046	1.99729	4.29352	1.76e-05	6.54e-05
HHATL	57467	0.997722	1.99684	4.5052	6.63e-06	2.66e-05
HTR1E	3354	0.996239	1.99479	3.03085	0.00243863	0.00577
INHBE	83729	0.995417	1.99366	4.2048	2.61e-05	9.41e-05
GDPD2	54857	0.994988	1.99306	3.81862	0.000134199	0.000418953
CAMKV	79012	0.994739	1.99272	3.24366	0.00118005	0.00299236
LRFN5	145581	0.994578	1.9925	3.44001	0.0005817	0.00157956
GJC3	349149	0.99455	1.99246	4.30906	1.64e-05	6.13e-05
NGFR	4804	0.99359	1.99113	4.4372	9.11e-06	3.56e-05
SPESP1	246777	0.993549	1.99108	4.18965	2.79e-05	0.00010001
GLI1	2735	0.993164	1.99055	4.45753	8.29e-06	3.27e-05
RUNDC3B	154661	0.992156	1.98916	10.7378	6.76e-27	6.19e-25
SIGLECP3	284367	0.991504	1.98826	3.56325	0.000366294	0.00104455
SV2C	22987	0.991098	1.9877	3.21374	0.00131021	0.0032909
FILIP1L	11259	0.990772	1.98725	8.86167	7.88e-19	2.45e-17
ELTD1	64123	0.988946	1.98473	12.271	1.3e-34	2.95e-32
C9orf153	389766	0.987629	1.98292	4.75792	1.96e-06	8.69e-06
EPAS1	2034	0.987302	1.98247	12.9309	3.01e-38	1.27e-35
ITIH3	3699	0.986834	1.98183	4.78898	1.68e-06	7.57e-06
NRN1	51299	0.986664	1.9816	10.4517	1.44e-25	1.14e-23
CHRDL1	91851	0.98584	1.98047	3.50778	0.00045186	0.00126095
USP2	9099	0.985301	1.97973	7.29874	2.9e-13	4.01e-12
FAM13C	220965	0.985241	1.97964	7.67627	1.64e-14	2.7e-13
ADAMTS5	11096	0.985098	1.97945	6.62186	3.55e-11	3.61e-10
PKNOX2	63876	0.983886	1.97779	3.4835	0.000494895	0.00136813
QPRT	23475	0.982601	1.97602	5.08385	3.7e-07	1.89e-06
C17orf91	84981	0.982528	1.97592	8.94049	3.87e-19	1.25e-17
LOC283856	283856	0.982038	1.97525	5.43047	5.62e-08	3.34e-07
EFCAB1	79645	0.980723	1.97345	4.43745	9.1e-06	3.56e-05
TCF4	6925	0.979857	1.97227	12.7601	2.74e-37	9.69e-35
KCNN2	3781	0.978815	1.97085	8.38741	4.97e-17	1.2e-15
HKDC1	80201	0.978685	1.97067	4.76958	1.85e-06	8.23e-06
ONECUT2	9480	0.978515	1.97044	5.28653	1.25e-07	6.93e-07
ADPRHL1	113622	0.977352	1.96885	5.43895	5.36e-08	3.2e-07
DOC2B	8447	0.976245	1.96734	5.72522	1.03e-08	7.05e-08
EFHC2	80258	0.975326	1.96609	5.83922	5.24e-09	3.77e-08
CDH5	1003	0.97479	1.96535	12.1918	3.44e-34	7.02e-32
ODF3L2	284451	0.974745	1.96529	5.57716	2.44e-08	1.56e-07
2019-09-03	55964	0.973104	1.96306	6.73398	1.65e-11	1.76e-10
ANKS1B	56899	0.972558	1.96232	6.5353	6.35e-11	6.23e-10
SOX18	54345	0.971709	1.96116	6.93375	4.1e-12	4.78e-11
REM1	28954	0.971325	1.96064	6.05152	1.43e-09	1.13e-08
EDN3	1908	0.97042	1.95941	2.86635	0.00415238	0.0092805
WASF3	10810	0.970375	1.95935	8.13074	4.27e-16	8.98e-15
SLC24A3	57419	0.970299	1.95925	5.14433	2.68e-07	1.4e-06
MT1A	4489	0.970229	1.95915	4.62489	3.75e-06	1.57e-05
GLB1L3	112937	0.968753	1.95715	2.85673	0.00428026	0.00952911
LOC100190938	100190938	0.968053	1.9562	10.5432	5.46e-26	4.53e-24
ALDH1A2	8854	0.967481	1.95542	4.71792	2.38e-06	1.04e-05
CCDC135	84229	0.967161	1.95499	3.24435	0.00117719	0.00298681
FAM187B	148109	0.965428	1.95264	2.98383	0.00284661	0.00662232
PDGFB	5155	0.964227	1.95102	12.1826	3.85e-34	7.76e-32
ADRB1	153	0.963809	1.95045	5.82959	5.56e-09	3.98e-08
TMEM47	83604	0.963339	1.94982	8.00606	1.18e-15	2.32e-14
SCGB2A1	4246	0.962294	1.94841	4.30479	1.67e-05	6.23e-05
JAM3	83700	0.962229	1.94832	11.3748	5.59e-30	7.03e-28
EMX2OS	196047	0.96148	1.94731	4.30944	1.64e-05	6.12e-05
ELFN1	392617	0.961143	1.94685	9.85348	6.62e-23	3.73e-21
SLC5A1	6523	0.95862	1.94345	3.14697	0.00164974	0.00405365
SEMA6A	57556	0.958133	1.94279	9.69632	3.13e-22	1.6e-20
TSPAN8	7103	0.958038	1.94267	3.41948	0.000627417	0.00168872
BMP8B	656	0.957946	1.94254	6.27017	3.61e-10	3.14e-09
C1QTNF2	114898	0.957905	1.94249	6.90382	5.06e-12	5.81e-11
DUOX2	50506	0.957878	1.94245	5.84182	5.16e-09	3.71e-08
ECSCR	641700	0.9577	1.94221	9.55207	1.27e-21	5.94e-20
RASSF9	9182	0.957526	1.94198	6.52343	6.87e-11	6.7e-10
GPR126	57211	0.957341	1.94173	6.90703	4.95e-12	5.7e-11
NWD1	284434	0.957073	1.94137	3.55932	0.000371823	0.00105891
LTF	4057	0.956637	1.94078	4.17848	2.93e-05	0.000104547
SORBS1	10580	0.956615	1.94075	9.3034	1.36e-20	5.46e-19
TMEM171	134285	0.956557	1.94067	5.46832	4.54e-08	2.75e-07
NR4A1	3164	0.956542	1.94065	4.69805	2.63e-06	1.14e-05
C7orf58	79974	0.956262	1.94028	7.1639	7.84e-13	1.01e-11
RIMS4	140730	0.955989	1.93991	4.52119	6.15e-06	2.48e-05
LIPG	9388	0.955892	1.93978	6.99381	2.68e-12	3.19e-11
FAM101B	359845	0.955871	1.93975	8.30649	9.86e-17	2.3e-15
CNDP1	84735	0.955781	1.93963	3.81272	0.000137448	0.000428269
MAB21L1	4081	0.953715	1.93685	5.99338	2.06e-09	1.57e-08
EPHB6	2051	0.9525	1.93522	6.65536	2.83e-11	2.92e-10
RTBDN	83546	0.952162	1.93477	2.86902	0.00411741	0.00921404
BARX2	8538	0.952162	1.93477	3.31502	0.00091636	0.00237945
C14orf64	388011	0.952111	1.9347	5.74293	9.31e-09	6.4e-08
CTSG	1511	0.95141	1.93376	3.39801	0.000678783	0.0018124
SP7	121340	0.95049	1.93253	3.62127	0.00029316	0.000853231
SH2D3C	10044	0.950316	1.9323	9.81983	9.25e-23	5.11e-21
COL5A3	50509	0.950116	1.93203	6.86152	6.81e-12	7.68e-11
SHANK3	85358	0.949595	1.93133	12.0192	2.82e-33	5.32e-31
PNMA6A	84968	0.949507	1.93121	6.07116	1.27e-09	1.01e-08
FMN2	56776	0.949447	1.93113	4.01901	5.84e-05	0.00019649
WISP2	8839	0.948802	1.93027	3.44392	0.00057335	0.00156095
TKTL1	8277	0.948325	1.92963	3.46178	0.00053661	0.00147153
NDUFA4L2	56901	0.948236	1.92951	6.86753	6.53e-12	7.37e-11
RGS22	26166	0.947438	1.92844	3.77351	0.000160967	0.000495207
ABCC9	10060	0.946297	1.92692	6.92316	4.42e-12	5.13e-11
FBXW10	10517	0.94595	1.92646	4.40692	1.05e-05	4.06e-05
RBP7	116362	0.944764	1.92487	7.17334	7.32e-13	9.44e-12
CCDC141	285025	0.944393	1.92438	7.22432	5.04e-13	6.66e-12
OPN1SW	611	0.943281	1.9229	3.98432	6.77e-05	0.000224458
KCNJ10	3766	0.94288	1.92236	5.29975	1.16e-07	6.49e-07
CCL16	6360	0.941545	1.92058	3.79712	0.000146386	0.000454127
ASPG	374569	0.94122	1.92015	3.60283	0.000314772	0.000910088
LRFN1	57622	0.940739	1.91951	5.77186	7.84e-09	5.47e-08
ACVRL1	94	0.938883	1.91704	9.31525	1.22e-20	4.92e-19
SLC26A10	65012	0.938609	1.91668	5.42519	5.79e-08	3.43e-07
JAZF1	221895	0.938258	1.91621	12.6135	1.78e-36	5.26e-34
PPP1R3C	5507	0.938121	1.91603	5.8094	6.27e-09	4.45e-08
LOC728264	728264	0.938111	1.91602	6.01	1.86e-09	1.43e-08
GPR61	83873	0.937414	1.91509	4.7742	1.8e-06	8.07e-06
ZNF423	23090	0.937227	1.91484	9.48843	2.35e-21	1.05e-19
FGD5	152273	0.936629	1.91405	11.8373	2.5e-32	4.15e-30
LIN7A	8825	0.936133	1.91339	5.24369	1.57e-07	8.55e-07
MFSD2A	84879	0.935988	1.9132	5.02852	4.94e-07	2.46e-06
MOV10L1	54456	0.935712	1.91283	6.18287	6.29e-10	5.25e-09
CAMK1D	57118	0.935312	1.9123	10.2258	1.52e-24	1.07e-22
EPHA6	285220	0.934653	1.91143	5.40653	6.43e-08	3.77e-07
DENND2A	27147	0.93377	1.91026	7.05899	1.68e-12	2.06e-11
MYL4	4635	0.933759	1.91025	5.05899	4.21e-07	2.13e-06
CD93	22918	0.933588	1.91002	11.398	4.28e-30	5.42e-28
SERPINE1	5054	0.933234	1.90955	5.51208	3.55e-08	2.2e-07
PTPN4	5775	0.932638	1.90876	8.45663	2.75e-17	6.91e-16
GPR176	11245	0.932583	1.90869	8.6766	4.08e-18	1.15e-16
SLC16A6	9120	0.932339	1.90837	7.14268	9.15e-13	1.17e-11
DUSP15	128853	0.931732	1.90756	5.6414	1.69e-08	1.11e-07
DCLK2	166614	0.931251	1.90693	8.34022	7.41e-17	1.76e-15
ANO4	121601	0.930021	1.9053	3.90807	9.3e-05	0.000299077
CD248	57124	0.927203	1.90159	7.68617	1.52e-14	2.52e-13
ADAM23	8745	0.926678	1.90089	3.67122	0.000241393	0.000714636
TDRD9	122402	0.926223	1.90029	3.99736	6.41e-05	0.000213563
BRSK2	9024	0.925932	1.89991	4.9257	8.41e-07	4.02e-06
GAS1	2619	0.925825	1.89977	5.60027	2.14e-08	1.38e-07
AMPH	273	0.925308	1.89909	5.59414	2.22e-08	1.43e-07
PFKFB2	5208	0.925062	1.89877	7.08546	1.39e-12	1.72e-11
SV2B	9899	0.924464	1.89798	4.13563	3.54e-05	0.00012377
RPS6KA6	27330	0.924352	1.89783	5.79926	6.66e-09	4.7e-08
2019-09-04	5414	0.924233	1.89768	8.88153	6.59e-19	2.07e-17
SPSB4	92369	0.922707	1.89567	2.95668	0.00310968	0.00716576
FADS2	9415	0.922619	1.89555	7.67651	1.63e-14	2.7e-13
VIP	7432	0.92238	1.89524	4.40197	1.07e-05	4.15e-05
SOCS2	8835	0.922107	1.89488	10.1545	3.16e-24	2.11e-22
TRIM16L	147166	0.920357	1.89258	7.33288	2.25e-13	3.17e-12
ALDH1L2	160428	0.919917	1.89201	5.55186	2.83e-08	1.79e-07
CCL3L3	414062	0.919284	1.89118	3.07657	0.00209394	0.00503499
NR5A2	2494	0.918508	1.89016	7.05261	1.76e-12	2.15e-11
ADRA2B	151	0.91843	1.89006	6.36613	1.94e-10	1.76e-09
COLEC11	78989	0.917066	1.88827	4.52786	5.96e-06	2.41e-05
MT1F	4494	0.916463	1.88748	3.48961	0.000483724	0.00134017
PALM2	114299	0.915053	1.88564	7.32919	2.32e-13	3.25e-12
PHF21B	112885	0.914676	1.88515	4.49442	6.98e-06	2.78e-05
MAK	4117	0.91355	1.88367	6.39236	1.63e-10	1.5e-09
MYT1	4661	0.913177	1.88319	5.80885	6.29e-09	4.46e-08
CA7	766	0.913	1.88296	4.33967	1.43e-05	5.4e-05
TCFL5	10732	0.912916	1.88285	8.60423	7.68e-18	2.09e-16
DLL4	54567	0.911208	1.88062	7.89954	2.8e-15	5.22e-14
VEGFA	7422	0.911192	1.8806	8.32341	8.55e-17	2.01e-15
MESTIT1	317751	0.911137	1.88053	3.32515	0.00088372	0.00230177
MOSC2	54996	0.910871	1.88018	7.7236	1.13e-14	1.92e-13
RASGRP3	25780	0.90991	1.87893	9.22897	2.73e-20	1.04e-18
CYR61	3491	0.909528	1.87843	5.64238	1.68e-08	1.11e-07
DPH3B	100132911	0.908457	1.87704	6.5245	6.82e-11	6.66e-10
CDON	50937	0.907706	1.87606	5.49864	3.83e-08	2.35e-07
HLX	3142	0.907093	1.87526	7.50172	6.3e-14	9.6e-13
TEDDM1	127670	0.906454	1.87443	2.94727	0.00320588	0.00736544
PAPPA2	60676	0.906055	1.87391	3.59557	0.000323687	0.000933052
UST	10090	0.90594	1.87376	8.19157	2.58e-16	5.65e-15
RAMP2	10266	0.905791	1.87357	8.33503	7.75e-17	1.84e-15
COL4A1	1282	0.905343	1.87299	8.86333	7.77e-19	2.42e-17
ECM2	1842	0.904884	1.87239	7.17469	7.25e-13	9.36e-12
CHAC1	79094	0.904692	1.87215	4.95407	7.27e-07	3.52e-06
SUSD5	26032	0.902432	1.86921	5.7096	1.13e-08	7.67e-08
SLC6A9	6536	0.901569	1.8681	8.64652	5.31e-18	1.48e-16
EML6	400954	0.901075	1.86746	7.10707	1.19e-12	1.49e-11
PLA2G4F	255189	0.900904	1.86724	4.10679	4.01e-05	0.0001385
ADCY4	196883	0.899984	1.86605	9.84078	7.51e-23	4.19e-21
PRG4	10216	0.899978	1.86604	3.84291	0.000121583	0.000381853
KCNE4	23704	0.89967	1.86564	7.18321	6.81e-13	8.87e-12
MYLK	4638	0.899287	1.86514	9.61517	6.9e-22	3.33e-20
SGCG	6445	0.898321	1.8639	3.09762	0.00195079	0.00472342
ECEL1	9427	0.898097	1.86361	3.98667	6.7e-05	0.000222371
MAEL	84944	0.897836	1.86327	3.57704	0.000347509	0.000994932
GIMAP5	55340	0.897588	1.86295	8.90369	5.4e-19	1.72e-17
CHRM3	1131	0.897459	1.86278	5.68771	1.29e-08	8.65e-08
TP53INP2	58476	0.89745	1.86277	10.4237	1.93e-25	1.49e-23
MUSTN1	389125	0.897252	1.86251	5.62187	1.89e-08	1.24e-07
CEBPA	1050	0.897238	1.8625	6.27008	3.61e-10	3.14e-09
RIPPLY1	92129	0.896855	1.862	3.42924	0.000605285	0.0016346
GOT1	2805	0.895966	1.86086	7.90038	2.78e-15	5.2e-14
AKR1C3	8644	0.89583	1.86068	6.95385	3.55e-12	4.18e-11
PPFIA2	8499	0.895511	1.86027	6.03189	1.62e-09	1.26e-08
LINGO1	84894	0.894518	1.85899	6.29593	3.06e-10	2.68e-09
OPN4	94233	0.894273	1.85867	3.29853	0.000971913	0.00251121
GPR77	27202	0.894204	1.85858	7.28216	3.29e-13	4.51e-12
ITM2A	9452	0.893809	1.85807	8.79431	1.44e-18	4.32e-17
FAM184A	79632	0.893664	1.85789	7.67266	1.68e-14	2.78e-13
RASGRF2	5924	0.893499	1.85768	7.19204	6.38e-13	8.33e-12
LRRIQ1	84125	0.893343	1.85748	7.30074	2.86e-13	3.95e-12
LOC387646	387646	0.892936	1.85695	5.54693	2.91e-08	1.83e-07
SNPH	9751	0.892838	1.85683	11.372	5.76e-30	7.2e-28
MCF2L	23263	0.892355	1.8562	12.4643	1.17e-35	3.14e-33
ATP2C2	9914	0.891696	1.85536	4.33472	1.46e-05	5.51e-05
PLA2G12B	84647	0.891328	1.85488	3.32712	0.000877478	0.00228719
CDA	978	0.891168	1.85468	7.47527	7.7e-14	1.15e-12
HAPLN4	404037	0.890602	1.85395	3.13877	0.00169656	0.00415318
RHOJ	57381	0.890103	1.85331	9.8183	9.39e-23	5.18e-21
NRIP2	83714	0.889825	1.85295	9.82544	8.75e-23	4.87e-21
RFX8	731220	0.888547	1.85131	5.38803	7.12e-08	4.15e-07
MTUS2	23281	0.88753	1.85001	3.80538	0.000141589	0.000440015
INSC	387755	0.887064	1.84941	3.52398	0.000425113	0.00119212
ADAMTS4	9507	0.886124	1.8482	5.34301	9.14e-08	5.22e-07
SOX7	83595	0.884875	1.84661	7.5757	3.57e-14	5.65e-13
WDR38	401551	0.884544	1.84618	3.40564	0.000660101	0.00176784
KLHL3	26249	0.881805	1.84268	6.21102	5.26e-10	4.46e-09
HIC1	3090	0.881565	1.84237	6.72305	1.78e-11	1.9e-10
UNC13A	23025	0.879629	1.8399	5.69529	1.23e-08	8.3e-08
MSTN	2660	0.879485	1.83972	4.95338	7.29e-07	3.53e-06
FGFR1	2260	0.879087	1.83921	8.75531	2.04e-18	5.97e-17
ART4	420	0.878634	1.83863	4.15917	3.19e-05	0.000112992
PDE8B	8622	0.878136	1.838	5.54228	2.99e-08	1.88e-07
EGFLAM	133584	0.87766	1.83739	7.86275	3.76e-15	6.91e-14
KIAA1644	85352	0.874914	1.8339	4.68009	2.87e-06	1.23e-05
COL15A1	1306	0.874148	1.83293	8.13094	4.26e-16	8.98e-15
FRMPD1	22844	0.873758	1.83243	3.91843	8.91e-05	0.000287663
A2M	2	0.872392	1.8307	11.5538	7.06e-31	9.87e-29
AQP1	358	0.871721	1.82984	8.80672	1.29e-18	3.89e-17
SLIT3	6586	0.87098	1.8289	7.81734	5.39e-15	9.7e-14
C20orf54	113278	0.870155	1.82786	6.68104	2.37e-11	2.48e-10
CYTL1	54360	0.869934	1.82758	5.24058	1.6e-07	8.68e-07
PRR18	285800	0.869873	1.8275	4.02703	5.65e-05	0.00019048
GEFT	115557	0.869532	1.82707	7.37889	1.6e-13	2.29e-12
RGAG1	57529	0.868527	1.8258	5.08005	3.77e-07	1.92e-06
MCAM	4162	0.868096	1.82525	9.41668	4.66e-21	2.02e-19
C15orf26	161502	0.867606	1.82463	4.07083	4.68e-05	0.000159616
SLC15A2	6565	0.866252	1.82292	6.10328	1.04e-09	8.4e-09
TPPP3	51673	0.865999	1.8226	6.42284	1.34e-10	1.24e-09
UNC80	285175	0.865481	1.82195	4.94716	7.53e-07	3.63e-06
SNAI1	6615	0.86502	1.82137	5.83116	5.5e-09	3.94e-08
ERO1LB	56605	0.864964	1.82129	7.82764	4.97e-15	8.99e-14
ADAMTS1	9510	0.864873	1.82118	7.28026	3.33e-13	4.57e-12
DACT3	147906	0.862732	1.81848	7.61553	2.63e-14	4.24e-13
CYP7B1	9420	0.861056	1.81637	7.84978	4.17e-15	7.59e-14
ROBO2	6092	0.86046	1.81562	4.45308	8.46e-06	3.33e-05
SLITRK2	84631	0.860414	1.81556	2.98045	0.00287828	0.00668723
PIK3R3	8503	0.859497	1.81441	9.8478	7.01e-23	3.92e-21
NCRNA00092	100188953	0.859258	1.81411	4.78444	1.71e-06	7.72e-06
MYLK3	91807	0.858934	1.8137	4.45409	8.43e-06	3.32e-05
PPP1R14A	94274	0.858392	1.81302	6.04337	1.51e-09	1.18e-08
LOC284798	284798	0.857704	1.81215	3.07381	0.00211346	0.00507733
FAM43B	163933	0.857139	1.81144	4.5804	4.64e-06	1.91e-05
KCNJ8	3764	0.857019	1.81129	7.55665	4.14e-14	6.47e-13
DNAI1	27019	0.856899	1.81114	3.78109	0.000156144	0.000481787
CCDC67	159989	0.85642	1.81054	5.49163	3.98e-08	2.44e-07
OLFML1	283298	0.855368	1.80922	6.73103	1.68e-11	1.8e-10
ACSM5	54988	0.855232	1.80905	5.2817	1.28e-07	7.08e-07
SH2D6	284948	0.855103	1.80889	2.85901	0.00424965	0.00947047
THPO	7066	0.854938	1.80868	4.68755	2.76e-06	1.19e-05
PCDHB4	56131	0.854729	1.80842	7.63005	2.35e-14	3.81e-13
HOXA2	3199	0.854563	1.80821	5.81162	6.19e-09	4.39e-08
PHGDH	26227	0.85445	1.80807	6.89238	5.49e-12	6.26e-11
NT5C1A	84618	0.85362	1.80703	3.36692	0.000760123	0.00200515
C16orf46	123775	0.853122	1.80641	9.17736	4.42e-20	1.64e-18
LEF1	51176	0.852018	1.80502	6.38102	1.76e-10	1.6e-09
ACOT11	26027	0.851032	1.80379	6.89034	5.57e-12	6.35e-11
CACNA1H	8912	0.850941	1.80368	6.44309	1.17e-10	1.1e-09
B4GALNT1	2583	0.850894	1.80362	5.35515	8.55e-08	4.91e-07
SOX17	64321	0.850741	1.80343	6.89919	5.23e-12	5.99e-11
ACTG2	72	0.850249	1.80281	4.67894	2.88e-06	1.24e-05
PZP	5858	0.849813	1.80227	4.31043	1.63e-05	6.09e-05
CLUL1	27098	0.84968	1.8021	5.22173	1.77e-07	9.55e-07
DNAH7	56171	0.848771	1.80097	7.51849	5.54e-14	8.51e-13
EBF1	1879	0.848571	1.80072	6.87625	6.14e-12	6.96e-11
AXIN2	8313	0.847987	1.79999	6.69908	2.1e-11	2.21e-10
OR2W3	343171	0.847884	1.79986	5.3929	6.93e-08	4.04e-07
CNRIP1	25927	0.847853	1.79982	9.8623	6.06e-23	3.44e-21
MAP1LC3C	440738	0.847613	1.79952	4.91816	8.74e-07	4.17e-06
SPEF1	25876	0.846647	1.79832	6.26056	3.84e-10	3.32e-09
F8	2157	0.846508	1.79814	10.4476	1.5e-25	1.18e-23
HTRA1	5654	0.846297	1.79788	9.60978	7.27e-22	3.5e-20
LOC143666	143666	0.846143	1.79769	4.94985	7.43e-07	3.59e-06
LRRC4	64101	0.84598	1.79749	6.5581	5.45e-11	5.39e-10
CCDC48	79825	0.844625	1.7958	5.52027	3.38e-08	2.11e-07
CCL3L1	6349	0.843662	1.7946	3.70465	0.000211687	0.000633989
METRN	79006	0.842828	1.79356	5.5946	2.21e-08	1.43e-07
DACT2	168002	0.842553	1.79322	3.03187	0.00243046	0.00575297
CYP4X1	260293	0.842097	1.79265	7.14677	8.88e-13	1.14e-11
MTCH1	23787	0.841781	1.79226	10.7696	4.79e-27	4.5e-25
2019-03-03	115123	0.841661	1.79211	8.88219	6.56e-19	2.06e-17
CCDC19	25790	0.841528	1.79195	5.1469	2.65e-07	1.39e-06
NXPH4	11247	0.840358	1.79049	4.40663	1.05e-05	4.06e-05
NETO2	81831	0.84011	1.79019	5.87249	4.29e-09	3.13e-08
NCKAP5	344148	0.839538	1.78948	6.90658	4.96e-12	5.71e-11
LOC121838	121838	0.839103	1.78894	3.45897	0.000542252	0.00148448
AG2	387763	0.839012	1.78882	5.22736	1.72e-07	9.28e-07
C6orf195	154386	0.838721	1.78846	2.92428	0.00345252	0.00787196
CEND1	51286	0.837413	1.78684	5.20342	1.96e-07	1.05e-06
TLL1	7092	0.836384	1.78557	6.56479	5.21e-11	5.16e-10
NPTX2	4885	0.836291	1.78545	4.54519	5.49e-06	2.23e-05
SCN4A	6329	0.835363	1.78431	5.35438	8.59e-08	4.93e-07
NOS3	4846	0.835309	1.78424	9.99042	1.68e-23	1.02e-21
TBX1	6899	0.835151	1.78404	4.2022	2.64e-05	9.5e-05
PDPN	10630	0.834983	1.78384	4.31976	1.56e-05	5.86e-05
CALB1	793	0.834692	1.78348	3.07829	0.0020819	0.00500876
ZFHX4	79776	0.834633	1.7834	4.31817	1.57e-05	5.89e-05
PDE4B	5142	0.834233	1.78291	7.46687	8.21e-14	1.23e-12
CEBPG	1054	0.834101	1.78275	9.09865	9.15e-20	3.27e-18
HOXA5	3202	0.834041	1.78267	4.65961	3.17e-06	1.35e-05
BCO2	83875	0.833486	1.78199	4.58551	4.53e-06	1.87e-05
SOCS3	9021	0.833123	1.78154	5.14646	2.65e-07	1.39e-06
LHFP	10186	0.832623	1.78092	8.47877	2.28e-17	5.82e-16
TUBA3D	113457	0.832459	1.78072	4.90489	9.35e-07	4.44e-06
KIF17	57576	0.831606	1.77967	8.03967	9.01e-16	1.8e-14
ZNF833	401898	0.830975	1.77889	8.2481	1.61e-16	3.6e-15
LMO2	4005	0.829892	1.77755	8.94926	3.58e-19	1.16e-17
SYNE1	23345	0.82978	1.77741	5.89952	3.65e-09	2.69e-08
CCDC146	57639	0.829211	1.77671	6.32731	2.49e-10	2.22e-09
PIR	8544	0.829157	1.77665	7.14384	9.08e-13	1.16e-11
GARNL3	84253	0.829006	1.77646	7.73085	1.07e-14	1.83e-13
ABCG5	64240	0.828866	1.77629	3.47358	0.000513571	0.00141447
ZSCAN1	284312	0.828169	1.77543	4.8106	1.5e-06	6.87e-06
SLC25A42	284439	0.827884	1.77508	9.51043	1.9e-21	8.69e-20
ACRBP	84519	0.825806	1.77253	6.60622	3.94e-11	3.98e-10
LAMA4	3910	0.825221	1.77181	8.47235	2.4e-17	6.11e-16
RIMKLA	284716	0.824689	1.77115	4.70799	2.5e-06	1.09e-05
GIMAP7	168537	0.82192	1.76776	7.55273	4.26e-14	6.65e-13
CHRD	8646	0.821881	1.76771	6.36357	1.97e-10	1.78e-09
LOC100303728	100303728	0.820863	1.76646	8.31891	8.88e-17	2.08e-15
C9orf24	84688	0.819295	1.76454	4.36978	1.24e-05	4.75e-05
LHX6	26468	0.818228	1.76324	7.26767	3.66e-13	4.97e-12
FOXC1	2296	0.817988	1.76295	7.53256	4.98e-14	7.72e-13
GLYATL1	92292	0.816603	1.76125	3.10574	0.00189801	0.00460694
VLDLR	7436	0.815742	1.7602	6.36021	2.01e-10	1.82e-09
LAMA2	3908	0.815125	1.75945	4.08503	4.41e-05	0.000150971
IYD	389434	0.815038	1.75934	4.35096	1.36e-05	5.14e-05
LCN8	138307	0.814346	1.7585	3.34722	0.000816273	0.00214086
IRX1	79192	0.813989	1.75807	4.42635	9.58e-06	3.73e-05
TUBB2B	347733	0.813886	1.75794	3.1515	0.00162436	0.00399682
C18orf16	147429	0.813729	1.75775	2.99999	0.00269984	0.00631648
CPB2	1361	0.813476	1.75744	3.18703	0.00143744	0.00358017
NRARP	441478	0.813252	1.75717	7.55363	4.23e-14	6.61e-13
HYOU1	10525	0.812367	1.75609	8.4003	4.45e-17	1.09e-15
TIE1	7075	0.811992	1.75563	9.31415	1.23e-20	4.96e-19
LOC401093	401093	0.81101	1.75444	8.85056	8.71e-19	2.69e-17
RIMBP2	23504	0.810781	1.75416	4.2257	2.38e-05	8.66e-05
ACACB	32	0.810711	1.75408	7.37253	1.67e-13	2.4e-12
MYOZ3	91977	0.810041	1.75326	4.78732	1.69e-06	7.62e-06
TCEAL5	340543	0.809626	1.75276	6.60796	3.9e-11	3.93e-10
TBC1D4	9882	0.808867	1.75183	7.21756	5.29e-13	6.98e-12
SCD5	79966	0.808547	1.75145	8.43847	3.22e-17	7.96e-16
RSPH1	89765	0.806686	1.74919	8.53186	1.44e-17	3.81e-16
RHOB	388	0.806629	1.74912	7.2534	4.06e-13	5.45e-12
SHISA2	387914	0.806552	1.74903	5.36537	8.08e-08	4.66e-07
LOC442421	442421	0.804834	1.74694	5.97837	2.25e-09	1.71e-08
RASL11A	387496	0.803959	1.74589	5.39238	6.95e-08	4.06e-07
DCN	1634	0.803813	1.74571	3.40728	0.000656138	0.00175829
GNG11	2791	0.803211	1.74498	6.76501	1.33e-11	1.44e-10
ADAM21P1	145241	0.802872	1.74457	3.37732	0.000731961	0.0019372
CDK6	1021	0.802854	1.74455	7.71833	1.18e-14	2e-13
P2RY1	5028	0.802013	1.74353	5.91544	3.31e-09	2.45e-08
TPPP	11076	0.80144	1.74284	6.15453	7.53e-10	6.2e-09
FAM81B	153643	0.801374	1.74276	4.98467	6.21e-07	3.05e-06
TNFAIP8L1	126282	0.799831	1.7409	8.67677	4.07e-18	1.15e-16
STC1	6781	0.799607	1.74063	5.69109	1.26e-08	8.49e-08
KCNQ1	3784	0.798822	1.73968	8.56609	1.07e-17	2.88e-16
ZNF275	10838	0.79756	1.73816	8.13339	4.17e-16	8.82e-15
C12orf63	374467	0.796839	1.73729	3.52088	0.000430115	0.001205
ARG2	384	0.796547	1.73694	5.99602	2.02e-09	1.55e-08
LPAR4	2846	0.796425	1.73679	4.2874	1.81e-05	6.71e-05
RGN	9104	0.795663	1.73587	7.53661	4.82e-14	7.5e-13
SAMD14	201191	0.795449	1.73562	7.04697	1.83e-12	2.23e-11
IGSF10	285313	0.794754	1.73478	3.76345	0.000167588	0.000513617
LRRK2	120892	0.794591	1.73459	3.95281	7.72e-05	0.000252693
GPR124	25960	0.79408	1.73397	8.6089	7.38e-18	2.02e-16
RANBP3L	202151	0.792673	1.73228	3.57058	0.000356187	0.00101732
C9orf152	401546	0.792436	1.732	3.02029	0.00252534	0.00595294
C1QTNF4	114900	0.792368	1.73191	3.42906	0.000605685	0.00163518
LRRC17	10234	0.791231	1.73055	5.98994	2.1e-09	1.6e-08
GFOD2	81577	0.790992	1.73026	10.8363	2.32e-27	2.26e-25
SPNS2	124976	0.790735	1.72996	7.46876	8.1e-14	1.21e-12
LEFTY1	10637	0.790593	1.72979	3.98616	6.72e-05	0.000222807
PTPN5	84867	0.790151	1.72926	4.12406	3.72e-05	0.000129381
HSPA5	3309	0.790012	1.72909	8.51544	1.66e-17	4.34e-16
FBLN5	10516	0.78985	1.72889	7.54313	4.59e-14	7.15e-13
CDHR3	222256	0.789484	1.72846	4.93217	8.13e-07	3.9e-06
IRS1	3667	0.788927	1.72779	6.35412	2.1e-10	1.88e-09
LOC400043	400043	0.78871	1.72753	4.56351	5.03e-06	2.06e-05
GALNT10	55568	0.788643	1.72745	6.77461	1.25e-11	1.36e-10
HRH2	3274	0.788642	1.72745	4.10226	4.09e-05	0.000141103
FAM38B	63895	0.788285	1.72702	5.02183	5.12e-07	2.55e-06
SIX2	10736	0.788076	1.72677	3.95583	7.63e-05	0.000249789
LRRTM2	26045	0.788061	1.72675	4.97117	6.65e-07	3.25e-06
ITGA7	3679	0.787787	1.72642	8.19418	2.52e-16	5.54e-15
GPER	2852	0.787061	1.72556	5.74281	9.31e-09	6.4e-08
TMEM38B	55151	0.786443	1.72482	6.62743	3.42e-11	3.48e-10
COL6A6	131873	0.786319	1.72467	3.11346	0.00184906	0.00449857
PLA2G7	7941	0.785981	1.72426	5.26135	1.43e-07	7.84e-07
RORB	6096	0.78492	1.723	3.90801	9.31e-05	0.000299101
CLEC1A	51267	0.783853	1.72172	7.31074	2.66e-13	3.7e-12
FAM131C	348487	0.783602	1.72142	5.14523	2.67e-07	1.4e-06
TNXB	7148	0.783528	1.72134	6.38124	1.76e-10	1.6e-09
GP5	2814	0.78342	1.72121	4.75992	1.94e-06	8.61e-06
CLEC4E	26253	0.782489	1.7201	3.94256	8.06e-05	0.00026277
SYP	6855	0.782455	1.72006	7.67095	1.71e-14	2.81e-13
DLX6	1750	0.782212	1.71977	5.31785	1.05e-07	5.93e-07
TMEM119	338773	0.781738	1.7192	4.14022	3.47e-05	0.000121675
SH3RF3	344558	0.781388	1.71878	6.89669	5.32e-12	6.09e-11
SALL2	6297	0.780315	1.71751	9.42664	4.23e-21	1.84e-19
PLCB1	23236	0.778428	1.71526	6.1941	5.86e-10	4.92e-09
C2orf77	129881	0.777951	1.71469	7.09597	1.28e-12	1.61e-11
C9orf116	138162	0.777162	1.71376	7.60225	2.91e-14	4.66e-13
LDHD	197257	0.777068	1.71364	4.50988	6.49e-06	2.6e-05
DUSP19	142679	0.776576	1.71306	8.49925	1.91e-17	4.97e-16
B3GALT2	8707	0.776081	1.71247	3.21993	0.00128223	0.00322932
SLC9A3R2	9351	0.775877	1.71223	8.20704	2.27e-16	5e-15
CYTH3	9265	0.775694	1.71201	11.7095	1.14e-31	1.77e-29
FRY	10129	0.774843	1.711	8.79149	1.48e-18	4.42e-17
RHOBTB1	9886	0.771316	1.70683	7.33736	2.18e-13	3.07e-12
CSDC2	27254	0.771313	1.70682	2.92738	0.00341834	0.00780003
HSPB8	26353	0.771306	1.70681	4.82944	1.37e-06	6.3e-06
PRR15L	79170	0.770713	1.70611	5.50982	3.59e-08	2.23e-07
LOC100134868	100134868	0.769956	1.70522	4.13107	3.61e-05	0.000125952
AAK1	22848	0.768819	1.70387	10.1853	2.31e-24	1.58e-22
SLC4A5	57835	0.768565	1.70357	5.1069	3.27e-07	1.69e-06
APLNR	187	0.768387	1.70336	6.60382	4.01e-11	4.04e-10
PCP4L1	654790	0.76829	1.70325	3.70153	0.000214306	0.000641293
BNC2	54796	0.76762	1.70246	3.74802	0.000178235	0.000543152
FAM181B	220382	0.76746	1.70227	4.01109	6.04e-05	0.000202544
IGDCC4	57722	0.767303	1.70208	5.51535	3.48e-08	2.16e-07
HSPA12A	259217	0.767195	1.70196	5.78433	7.28e-09	5.11e-08
FAM151A	338094	0.767134	1.70189	2.85466	0.00430833	0.00958077
AKT2	208	0.766631	1.70129	9.2433	2.39e-20	9.16e-19
CACNB4	785	0.766132	1.7007	3.77676	0.000158879	0.000489035
TMOD2	29767	0.765105	1.69949	8.96339	3.15e-19	1.04e-17
DNAH9	1770	0.764647	1.69895	3.99588	6.45e-05	0.000214781
TNFRSF11B	4982	0.764423	1.69869	4.35152	1.35e-05	5.13e-05
GFPT2	9945	0.763658	1.69779	3.91808	8.93e-05	0.00028799
SEMA3E	9723	0.763573	1.69769	3.27944	0.00104015	0.00266558
TLL2	7093	0.762904	1.6969	3.28949	0.00100369	0.00258242
CPXM2	119587	0.762704	1.69667	5.05303	4.35e-07	2.19e-06
C11orf74	119710	0.762665	1.69662	6.10674	1.02e-09	8.23e-09
SLC22A23	63027	0.761089	1.69477	7.98736	1.38e-15	2.67e-14
C22orf34	348645	0.760144	1.69366	3.93005	8.49e-05	0.000275357
C5orf49	134121	0.759911	1.69339	4.51245	6.41e-06	2.58e-05
?	90288	0.759732	1.69318	5.1805	2.21e-07	1.17e-06
HSPG2	3339	0.7597	1.69314	9.72384	2.39e-22	1.24e-20
FEZ1	9638	0.759635	1.69306	7.13129	9.94e-13	1.26e-11
FAM182B	728882	0.759466	1.69286	5.04473	4.54e-07	2.28e-06
LOC100272216	100272216	0.759176	1.69252	4.47378	7.68e-06	3.05e-05
BDNF	627	0.758738	1.69201	4.37385	1.22e-05	4.67e-05
MSX2	4488	0.758695	1.69196	4.6862	2.78e-06	1.2e-05
GPAM	57678	0.758625	1.69188	4.94877	7.47e-07	3.61e-06
EDA	1896	0.757661	1.69075	4.22412	2.4e-05	8.71e-05
PKIA	5569	0.757378	1.69042	6.82232	8.96e-12	9.93e-11
FXYD1	5348	0.757225	1.69024	3.14387	0.0016673	0.00409227
GIMAP1	170575	0.757109	1.6901	7.66304	1.82e-14	2.98e-13
PRRX1	5396	0.756118	1.68894	4.59375	4.35e-06	1.8e-05
OXCT2	64064	0.755327	1.68801	4.48958	7.14e-06	2.84e-05
UNC5A	90249	0.754995	1.68763	3.7495	0.000177185	0.000540324
MFAP3L	9848	0.754321	1.68684	4.50797	6.55e-06	2.63e-05
TMTC1	83857	0.753809	1.68624	6.74065	1.58e-11	1.69e-10
SSTR2	6752	0.753791	1.68622	6.03504	1.59e-09	1.24e-08
KIF6	221458	0.753751	1.68617	5.27867	1.3e-07	7.18e-07
FGF11	2256	0.753667	1.68607	3.90924	9.26e-05	0.000297741
BHMT2	23743	0.753247	1.68558	4.04549	5.22e-05	0.000176848
SPTBN4	57731	0.753109	1.68542	5.35717	8.45e-08	4.86e-07
CPLX1	10815	0.753096	1.68541	6.20793	5.37e-10	4.54e-09
DPY19L2P4	442523	0.753021	1.68532	3.4347	0.000593207	0.00160614
LAYN	143903	0.75151	1.68355	5.39039	7.03e-08	4.1e-07
KCTD16	57528	0.751478	1.68352	3.29445	0.000986144	0.0025441
TGFBR2	7048	0.751008	1.68297	9.16764	4.83e-20	1.79e-18
ZFP92	139735	0.750798	1.68272	3.69048	0.000223829	0.000667089
MAPRE2	10982	0.750647	1.68255	10.2148	1.7e-24	1.19e-22
DCDC1	341019	0.749978	1.68177	4.70634	2.52e-06	1.1e-05
ADAMTS2	9509	0.749156	1.68081	3.89837	9.68e-05	0.000309964
PRKACB	5567	0.749064	1.6807	6.70203	2.06e-11	2.18e-10
LRP2	4036	0.748104	1.67958	4.28125	1.86e-05	6.88e-05
PCDH17	27253	0.747403	1.67877	6.6349	3.25e-11	3.32e-10
FAM70B	348013	0.747161	1.67849	7.75159	9.07e-15	1.57e-13
LRRC8C	84230	0.746875	1.67815	9.26206	2.01e-20	7.86e-19
HAR1A	768096	0.74676	1.67802	5.25953	1.44e-07	7.91e-07
GPR21	2844	0.74657	1.6778	5.08635	3.65e-07	1.87e-06
PPIF	10105	0.746425	1.67763	7.04362	1.87e-12	2.28e-11
FBLN1	2192	0.74605	1.67719	3.63359	0.000279508	0.000816041
SYNPO2	171024	0.745185	1.67619	6.20015	5.64e-10	4.75e-09
RRBP1	6238	0.744896	1.67585	12.6635	9.42e-37	3.04e-34
TCEAL7	56849	0.744712	1.67564	6.52697	6.71e-11	6.57e-10
COL4A2	1284	0.744456	1.67534	7.95441	1.8e-15	3.45e-14
DMGDH	29958	0.744103	1.67493	4.74281	2.11e-06	9.32e-06
ARHGAP31	57514	0.743919	1.67472	9.42667	4.23e-21	1.84e-19
NUAK1	9891	0.743851	1.67464	8.44763	2.97e-17	7.41e-16
ALPL	249	0.743114	1.67378	5.19791	2.02e-07	1.08e-06
THY1	7070	0.742133	1.67265	6.15884	7.33e-10	6.04e-09
POR	5447	0.741724	1.67217	9.5136	1.84e-21	8.47e-20
CXorf58	254158	0.741108	1.67146	4.77683	1.78e-06	7.98e-06
C10orf140	387640	0.739213	1.66927	7.06142	1.65e-12	2.03e-11
UNC45B	146862	0.738731	1.66871	3.96122	7.46e-05	0.00024476
HEYL	26508	0.738286	1.66819	7.27708	3.41e-13	4.67e-12
LOH12CR2	503693	0.738204	1.6681	6.81514	9.42e-12	1.04e-10
PAIP2B	400961	0.737968	1.66783	6.61255	3.78e-11	3.82e-10
AATK	9625	0.736956	1.66666	5.15939	2.48e-07	1.31e-06
HEY1	23462	0.736795	1.66647	7.08029	1.44e-12	1.78e-11
SYTL3	94120	0.736159	1.66574	7.44227	9.9e-14	1.47e-12
MYOM2	9172	0.736125	1.6657	5.40023	6.66e-08	3.9e-07
SSX5	6758	0.735823	1.66535	3.13949	0.00169243	0.00414421
FOXC2	2303	0.735204	1.66463	5.25038	1.52e-07	8.28e-07
EFNB3	1949	0.73444	1.66375	4.35786	1.31e-05	5e-05
TMEM130	222865	0.733725	1.66293	2.87097	0.0040921	0.00916886
RNF152	220441	0.73303	1.66213	6.34977	2.16e-10	1.94e-09
ANGPT2	285	0.73186	1.66078	5.6595	1.52e-08	1.01e-07
P2RY14	9934	0.731807	1.66072	5.65939	1.52e-08	1.01e-07
HMGCR	3156	0.730199	1.65887	11.0196	3.07e-28	3.21e-26
SLC6A16	28968	0.729356	1.6579	4.07109	4.68e-05	0.000159464
LOC100128164	100128164	0.728819	1.65728	5.30761	1.11e-07	6.24e-07
C20orf202	400831	0.728439	1.65685	5.84699	5.01e-09	3.61e-08
GTF3C1	2975	0.727575	1.65585	10.0878	6.25e-24	3.96e-22
JAKMIP3	282973	0.727445	1.6557	4.46247	8.1e-06	3.2e-05
GIPC2	54810	0.726721	1.65487	6.77117	1.28e-11	1.39e-10
ARAP3	64411	0.726613	1.65475	10.155	3.15e-24	2.11e-22
DLEU7	220107	0.726241	1.65432	3.61754	0.000297412	0.000864757
CASC2	255082	0.724816	1.65269	8.7691	1.8e-18	5.32e-17
LOC646982	646982	0.724483	1.65231	3.55245	0.000381667	0.00108433
EPN3	55040	0.723971	1.65172	5.18835	2.12e-07	1.13e-06
GEM	2669	0.72396	1.65171	4.69411	2.68e-06	1.16e-05
TPMT	7172	0.723777	1.6515	10.3281	5.26e-25	3.84e-23
NMBR	4829	0.723773	1.6515	3.64321	0.000269259	0.000788193
ATP6V1G2	534	0.723322	1.65098	5.64869	1.62e-08	1.07e-07
MIMT1	100073347	0.723246	1.65089	3.09248	0.00198494	0.00479825
IL11RA	3590	0.722953	1.65056	8.29475	1.09e-16	2.52e-15
TDRD6	221400	0.722196	1.64969	4.97261	6.61e-07	3.23e-06
ARSG	22901	0.721931	1.64939	8.7324	2.49e-18	7.2e-17
SNTA1	6640	0.721532	1.64893	5.87042	4.35e-09	3.16e-08
CNTNAP3	79937	0.720767	1.64806	3.82264	0.000132029	0.000412618
GLIS1	148979	0.719979	1.64716	3.86668	0.000110325	0.000349527
VAV3	10451	0.719122	1.64618	4.47467	7.65e-06	3.04e-05
NCALD	83988	0.719033	1.64608	7.52588	5.24e-14	8.1e-13
PFKM	5213	0.718899	1.64593	9.6516	4.84e-22	2.39e-20
SHANK2	22941	0.718832	1.64585	4.9959	5.86e-07	2.89e-06
ASB9	140462	0.71872	1.64572	8.27892	1.24e-16	2.85e-15
MAB21L2	10586	0.718579	1.64556	3.6959	0.000219111	0.000654457
CYCS	54205	0.718424	1.64538	8.17368	2.99e-16	6.49e-15
RGNEF	64283	0.718249	1.64518	4.77818	1.77e-06	7.93e-06
SPRY4	81848	0.717392	1.64421	9.09581	9.39e-20	3.35e-18
HOXB5	3215	0.717184	1.64397	4.55386	5.27e-06	2.15e-05
WDR93	56964	0.717175	1.64396	5.51785	3.43e-08	2.14e-07
C1orf182	128229	0.716338	1.64301	3.68303	0.00023048	0.000685185
APLP1	333	0.714856	1.64132	4.27653	1.9e-05	7.02e-05
HSPA2	3306	0.714702	1.64114	6.48765	8.72e-11	8.4e-10
CCDC13	152206	0.714683	1.64112	8.14766	3.71e-16	7.93e-15
DUSP27	92235	0.714112	1.64047	4.46044	8.18e-06	3.23e-05
STARD13	90627	0.713805	1.64012	7.19599	6.2e-13	8.1e-12
CRISPLD1	83690	0.712886	1.63908	6.00728	1.89e-09	1.45e-08
CYP4F12	66002	0.712132	1.63822	3.09908	0.00194122	0.0047028
SCML2	10389	0.711009	1.63695	6.31977	2.62e-10	2.33e-09
ST6GALNAC1	55808	0.709721	1.63549	4.51136	6.44e-06	2.59e-05
EBF4	57593	0.708931	1.63459	3.35095	0.000805346	0.00211408
ATP6V1B1	525	0.708868	1.63452	3.5791	0.000344773	0.000987738
ANKRD29	147463	0.708545	1.63416	4.30807	1.65e-05	6.15e-05
NOSTRIN	115677	0.708386	1.63398	5.01983	5.17e-07	2.57e-06
ILDR2	387597	0.707744	1.63325	3.30994	0.000933161	0.00241954
SV2A	9900	0.706796	1.63218	4.74105	2.13e-06	9.39e-06
PAX6	5080	0.706707	1.63207	10.4417	1.6e-25	1.25e-23
BCHE	590	0.706612	1.63197	2.97951	0.00288713	0.00670516
BCAP29	55973	0.706229	1.63153	9.61933	6.63e-22	3.21e-20
APOC1	341	0.706208	1.63151	3.19953	0.00137651	0.00344283
THSD1	55901	0.706134	1.63143	7.59779	3.01e-14	4.8e-13
LCN10	414332	0.705865	1.63112	3.73448	0.000188103	0.000569604
SLC26A8	116369	0.705261	1.63044	3.21731	0.00129397	0.0032552
CYGB	114757	0.705079	1.63023	5.50291	3.74e-08	2.3e-07
MANF	7873	0.705064	1.63022	7.12628	1.03e-12	1.31e-11
CBFA2T3	863	0.70497	1.63011	5.41039	6.29e-08	3.69e-07
LOC440925	440925	0.704059	1.62908	3.65378	0.000258405	0.000760056
PRELP	5549	0.703907	1.62891	3.67307	0.000239652	0.000710193
C4orf32	132720	0.703495	1.62845	9.05466	1.37e-19	4.75e-18
TPI1P2	286016	0.703369	1.6283	7.49929	6.42e-14	9.75e-13
DNAH10	196385	0.702705	1.62755	4.54739	5.43e-06	2.21e-05
CDC25A	993	0.702311	1.62711	6.57021	5.02e-11	4.99e-10
ST3GAL6	10402	0.701191	1.62585	4.61389	3.95e-06	1.65e-05
RASSF6	166824	0.700653	1.62524	3.11886	0.00181549	0.00442358
CCDC36	339834	0.699969	1.62447	5.40412	6.51e-08	3.82e-07
FBXO15	201456	0.699819	1.6243	4.37158	1.23e-05	4.72e-05
TMEM74	157753	0.699551	1.624	2.85013	0.00437019	0.00970557
ARMCX3	51566	0.699371	1.6238	4.71115	2.46e-06	1.08e-05
PRTG	283659	0.699318	1.62374	5.29583	1.18e-07	6.62e-07
TP53I11	9537	0.696573	1.62065	6.51585	7.23e-11	7.03e-10
CNGA4	1262	0.695711	1.61968	3.81339	0.000137074	0.00042718
ESM1	11082	0.694567	1.6184	3.78561	0.000153332	0.000473854
LOC285593	285593	0.693443	1.61714	5.50317	3.73e-08	2.3e-07
C20orf152	140894	0.693254	1.61693	4.73363	2.21e-06	9.71e-06
SALL1	6299	0.693179	1.61684	6.18531	6.2e-10	5.18e-09
CPT1A	1374	0.693156	1.61682	9.36802	7.39e-21	3.09e-19
PTH1R	5745	0.692983	1.61662	3.55026	0.000384857	0.00109147
C17orf82	388407	0.692554	1.61614	3.13643	0.00171017	0.00418303
AK7	122481	0.691985	1.6155	5.18404	2.17e-07	1.15e-06
ENG	2022	0.69136	1.61481	6.62374	3.5e-11	3.57e-10
FHAD1	114827	0.690749	1.61412	4.78316	1.73e-06	7.76e-06
LRRC55	219527	0.690721	1.61409	4.10561	4.03e-05	0.000139129
HAR1B	768097	0.689697	1.61294	3.00663	0.0026416	0.006199
CDADC1	81602	0.689619	1.61286	9.09539	9.42e-20	3.35e-18
PLCD4	84812	0.689217	1.61241	4.04693	5.19e-05	0.000175867
C6orf52	347744	0.689118	1.6123	3.4399	0.000581924	0.00157968
GNAL	2774	0.68873	1.61186	4.37774	1.2e-05	4.6e-05
DUOX1	53905	0.687331	1.6103	6.4304	1.27e-10	1.19e-09
ALDH2	217	0.686821	1.60973	6.30632	2.86e-10	2.52e-09
PPP1R12B	4660	0.685042	1.60775	8.95563	3.38e-19	1.11e-17
ACCN2	41	0.684533	1.60718	4.39094	1.13e-05	4.35e-05
ENDOU	8909	0.683663	1.60621	4.28824	1.8e-05	6.68e-05
LOC644538	644538	0.683442	1.60597	7.2278	4.91e-13	6.5e-12
HYAL1	3373	0.682944	1.60541	6.88036	5.97e-12	6.77e-11
SPRY1	10252	0.682897	1.60536	6.14605	7.94e-10	6.5e-09
SOD3	6649	0.682835	1.60529	3.45251	0.000555405	0.00151675
MYH3	4621	0.681192	1.60346	4.13788	3.51e-05	0.000122731
SPATA17	128153	0.681021	1.60327	6.7022	2.05e-11	2.18e-10
SDF2L1	23753	0.680906	1.60315	4.93368	8.07e-07	3.88e-06
HOXA3	3200	0.679905	1.60203	4.69311	2.69e-06	1.17e-05
CGNL1	84952	0.6786	1.60059	4.62714	3.71e-06	1.55e-05
C6orf217	100131814	0.678005	1.59993	7.70848	1.27e-14	2.14e-13
C5orf23	79614	0.677658	1.59954	3.13526	0.001717	0.004198
CCDC163P	126661	0.677316	1.59916	4.27958	1.87e-05	6.92e-05
GPR146	115330	0.67662	1.59839	7.24928	4.19e-13	5.61e-12
ANTXR1	84168	0.676374	1.59812	6.05271	1.42e-09	1.12e-08
SLC45A1	50651	0.675786	1.59747	6.1899	6.02e-10	5.05e-09
ACADSB	36	0.675677	1.59735	7.61272	2.68e-14	4.33e-13
SCN5A	6331	0.675213	1.59683	3.40296	0.000666591	0.0017828
OSBPL1A	114876	0.675177	1.59679	7.97993	1.46e-15	2.83e-14
LOC257358	257358	0.67514	1.59675	4.23242	2.31e-05	8.43e-05
TRPC3	7222	0.675107	1.59672	4.28613	1.82e-05	6.74e-05
SLC4A3	6508	0.675065	1.59667	4.67503	2.94e-06	1.26e-05
ZNF488	118738	0.675007	1.5966	3.9376	8.23e-05	0.000267913
C14orf174	161394	0.674649	1.59621	6.81724	9.28e-12	1.03e-10
FAT4	79633	0.67464	1.5962	6.05877	1.37e-09	1.09e-08
PLCL1	5334	0.674128	1.59563	5.693	1.25e-08	8.4e-08
RSPH4A	345895	0.673475	1.59491	4.26598	1.99e-05	7.33e-05
TUBB1	81027	0.672886	1.59426	6.1547	7.52e-10	6.19e-09
ESAM	90952	0.671992	1.59327	7.33772	2.17e-13	3.06e-12
LRRIQ3	127255	0.671723	1.59297	4.71031	2.47e-06	1.08e-05
SOX30	11063	0.670739	1.59189	4.57942	4.66e-06	1.92e-05
ACTN2	88	0.670456	1.59158	3.01981	0.00252935	0.00596161
HEPHL1	341208	0.670017	1.59109	3.37208	0.000746019	0.00197178
WWOX	51741	0.669786	1.59084	7.81664	5.43e-15	9.75e-14
ISM1	140862	0.669682	1.59072	4.01202	6.02e-05	0.000201858
GJA5	2702	0.669084	1.59006	6.57091	5e-11	4.97e-10
PLAC9	219348	0.668905	1.58987	3.64384	0.000268605	0.000786667
PRR16	51334	0.668828	1.58978	5.59851	2.16e-08	1.4e-07
ADAMTS7	11173	0.667497	1.58831	6.01668	1.78e-09	1.37e-08
SLC25A33	84275	0.667295	1.58809	6.9338	4.1e-12	4.78e-11
SLC45A4	57210	0.66688	1.58764	9.00333	2.19e-19	7.35e-18
ADIPOR2	79602	0.666806	1.58755	10.6449	1.84e-26	1.61e-24
KIAA1614	57710	0.66622	1.58691	6.49182	8.48e-11	8.18e-10
AGPAT4	56895	0.665265	1.58586	4.90329	9.42e-07	4.47e-06
PARK2	5071	0.664889	1.58545	8.6149	7e-18	1.92e-16
FOXS1	2307	0.664173	1.58466	4.87393	1.09e-06	5.14e-06
IQCH	64799	0.663878	1.58434	6.82595	8.73e-12	9.7e-11
ST6GAL2	84620	0.663814	1.58427	5.05619	4.28e-07	2.16e-06
C14orf50	145376	0.663644	1.58408	3.71224	0.000205433	0.000616925
DYSF	8291	0.663639	1.58407	7.41063	1.26e-13	1.83e-12
GPR162	27239	0.663512	1.58393	4.18904	2.8e-05	0.000100248
NEK5	341676	0.663079	1.58346	3.3287	0.000872529	0.00227496
LYVE1	10894	0.662866	1.58322	3.70587	0.000210668	0.000631256
BEX5	340542	0.661153	1.58135	6.90746	4.93e-12	5.68e-11
LOC653501	653501	0.660898	1.58107	7.30145	2.85e-13	3.94e-12
ASPRV1	151516	0.660361	1.58048	7.65243	1.97e-14	3.22e-13
CASC1	55259	0.66008	1.58017	6.26076	3.83e-10	3.31e-09
PPAPDC3	84814	0.659733	1.57979	5.68325	1.32e-08	8.86e-08
RGS7BP	401190	0.659693	1.57975	3.11505	0.00183913	0.00447688
LOC145820	145820	0.659678	1.57973	5.02793	4.96e-07	2.47e-06
UGT8	7368	0.659003	1.57899	3.60191	0.000315889	0.000912797
LOC100128788	100128788	0.658853	1.57883	4.9373	7.92e-07	3.81e-06
CCDC87	55231	0.658166	1.57808	7.13028	1e-12	1.27e-11
TFPI	7035	0.657919	1.5778	6.08916	1.14e-09	9.13e-09
SNAI2	6591	0.657861	1.57774	5.09238	3.54e-07	1.81e-06
GPD1L	23171	0.657861	1.57774	7.72326	1.13e-14	1.93e-13
LRRC36	55282	0.657487	1.57733	3.51517	0.000439474	0.0012287
GATM	2628	0.657388	1.57723	4.10097	4.11e-05	0.000141842
WIPF3	644150	0.656515	1.57627	5.25635	1.47e-07	8.03e-07
LPCAT2	54947	0.656464	1.57621	7.9176	2.42e-15	4.58e-14
FAM19A3	284467	0.656429	1.57618	3.18265	0.00145934	0.00363005
ZNF781	163115	0.656288	1.57602	5.01864	5.2e-07	2.58e-06
TMEM132A	54972	0.655958	1.57566	4.74203	2.12e-06	9.35e-06
C20orf132	140699	0.655809	1.5755	8.05535	7.92e-16	1.6e-14
GPR155	151556	0.655676	1.57535	5.42031	5.95e-08	3.52e-07
VWA1	64856	0.655532	1.5752	6.72052	1.81e-11	1.93e-10
LPHN2	23266	0.654851	1.57445	5.79093	7e-09	4.93e-08
TNS1	7145	0.654265	1.57381	9.27658	1.75e-20	6.95e-19
ACHE	43	0.653947	1.57347	3.85437	0.00011603	0.000365903
IRAK3	11213	0.652748	1.57216	6.87325	6.28e-12	7.1e-11
TMEM232	642987	0.652432	1.57182	6.2984	3.01e-10	2.64e-09
SQLE	6713	0.651796	1.57112	7.74442	9.6e-15	1.65e-13
RNF112	7732	0.651582	1.57089	4.86937	1.12e-06	5.25e-06
USP44	84101	0.648021	1.56702	4.93447	8.04e-07	3.86e-06
PID1	55022	0.647485	1.56644	3.99343	6.51e-05	0.000216889
CRELD2	79174	0.647051	1.56596	5.65447	1.56e-08	1.04e-07
ACTA1	58	0.646352	1.56521	3.01712	0.00255189	0.00600914
WNT9B	7484	0.646301	1.56515	3.52091	0.000430063	0.001205
ANK3	288	0.642973	1.56154	6.96442	3.3e-12	3.89e-11
C10orf79	80217	0.64297	1.56154	4.61229	3.98e-06	1.66e-05
ITGA5	3678	0.642445	1.56097	8.65934	4.75e-18	1.33e-16
CYB561	1534	0.641601	1.56006	8.39132	4.81e-17	1.17e-15
FLI1	2313	0.641143	1.55956	7.51102	5.87e-14	8.98e-13
KLHL10	317719	0.640873	1.55927	4.37882	1.19e-05	4.58e-05
CCDC110	256309	0.640858	1.55926	5.28355	1.27e-07	7.02e-07
EEPD1	80820	0.640715	1.5591	7.35743	1.87e-13	2.67e-12
FRZB	2487	0.639799	1.55811	4.77416	1.8e-06	8.07e-06
CAPN11	11131	0.639788	1.5581	4.58352	4.57e-06	1.89e-05
COL21A1	81578	0.639338	1.55761	4.27479	1.91e-05	7.07e-05
DBH	1621	0.639031	1.55728	3.69707	0.0002181	0.000651547
MTSS1	9788	0.638499	1.55671	5.64473	1.65e-08	1.09e-07
ABCA9	10350	0.638039	1.55621	3.19179	0.00141395	0.0035295
TNFAIP8L3	388121	0.637683	1.55583	4.83761	1.31e-06	6.08e-06
OPLAH	26873	0.637446	1.55557	5.10817	3.25e-07	1.68e-06
EPHX1	2052	0.637114	1.55522	6.01482	1.8e-09	1.39e-08
DLL1	28514	0.637033	1.55513	5.77294	7.79e-09	5.44e-08
KCNA6	3742	0.636974	1.55506	3.52995	0.000415634	0.00116923
UBE2QL1	134111	0.636528	1.55458	4.78919	1.67e-06	7.56e-06
PHKG1	5260	0.636413	1.55446	4.15304	3.28e-05	0.000115658
HIST1H3H	8357	0.636201	1.55423	3.3808	0.00072275	0.00191625
FMNL3	91010	0.636112	1.55414	9.86245	6.06e-23	3.44e-21
PBXIP1	57326	0.635738	1.55373	8.85503	8.37e-19	2.6e-17
SYPL2	284612	0.635561	1.55354	4.72672	2.28e-06	1e-05
OTUD7A	161725	0.635456	1.55343	7.00139	2.53e-12	3.04e-11
DDIT3	1649	0.634777	1.5527	4.99673	5.83e-07	2.87e-06
MLEC	9761	0.634702	1.55262	8.47738	2.3e-17	5.87e-16
TBX18	9096	0.634573	1.55248	3.6314	0.000281885	0.000822304
APOD	347	0.634515	1.55242	2.94932	0.00318474	0.00732064
FSCN1	6624	0.63407	1.55194	6.59598	4.22e-11	4.24e-10
EGR1	1958	0.633134	1.55093	4.08224	4.46e-05	0.000152532
IQCG	84223	0.631494	1.54917	8.46228	2.62e-17	6.62e-16
BFSP1	631	0.63109	1.54873	4.68061	2.86e-06	1.23e-05
CLDN6	9074	0.630393	1.54799	3.20417	0.00135451	0.00339306
HSP90B3P	343477	0.629877	1.54743	4.20147	2.65e-05	9.53e-05
MOSC1	64757	0.629152	1.54666	5.18573	2.15e-07	1.14e-06
CCIN	881	0.628715	1.54619	3.35102	0.000805131	0.00211383
TAGLN	6876	0.628523	1.54598	4.95105	7.38e-07	3.57e-06
GUCY1A2	2977	0.628502	1.54596	4.79448	1.63e-06	7.38e-06
CALR	811	0.628365	1.54581	7.21892	5.24e-13	6.92e-12
MFRP	83552	0.627614	1.54501	5.46466	4.64e-08	2.81e-07
DCHS1	8642	0.627355	1.54473	8.06588	7.27e-16	1.48e-14
FZD8	8325	0.627339	1.54471	5.35423	8.59e-08	4.93e-07
GIMAP4	55303	0.626942	1.54429	6.91051	4.83e-12	5.57e-11
CHRM5	1133	0.626325	1.54363	2.9974	0.00272292	0.00636125
C6orf155	79940	0.625966	1.54324	5.67505	1.39e-08	9.28e-08
ADCY3	109	0.625718	1.54298	9.35378	8.46e-21	3.51e-19
C21orf34	388815	0.625372	1.54261	5.97688	2.27e-09	1.72e-08
RGMA	56963	0.625272	1.5425	5.12687	2.95e-07	1.53e-06
OSR1	130497	0.625151	1.54237	2.94389	0.00324116	0.00743399
NAP1L5	266812	0.624915	1.54212	8.82651	1.08e-18	3.29e-17
ATP2A3	489	0.624251	1.54141	4.77988	1.75e-06	7.88e-06
KCTD15	79047	0.623834	1.54096	5.62338	1.87e-08	1.23e-07
CXCR7	57007	0.62348	1.54059	4.92035	8.64e-07	4.12e-06
HIST1H2AK	8330	0.623019	1.54009	3.65261	0.00025959	0.000763288
RP1L1	94137	0.622989	1.54006	4.21627	2.48e-05	8.98e-05
PCDHGA9	56107	0.621965	1.53897	3.33792	0.000844078	0.00220759
ZNF883	169834	0.621443	1.53841	3.82003	0.000133436	0.000416647
MOCS1	4337	0.621001	1.53794	9.6556	4.65e-22	2.31e-20
WDR31	114987	0.620947	1.53788	4.67018	3.01e-06	1.29e-05
C14orf139	79686	0.620925	1.53786	6.56839	5.09e-11	5.05e-10
C8orf79	57604	0.620924	1.53786	4.9024	9.47e-07	4.48e-06
PRPS1	5631	0.620805	1.53773	8.80157	1.35e-18	4.06e-17
EDIL3	10085	0.620179	1.53707	3.64821	0.000264071	0.000774668
NFIA	4774	0.620159	1.53705	8.16404	3.24e-16	6.96e-15
ENPP1	5167	0.620148	1.53703	3.58941	0.000331427	0.000952887
ZFP36	7538	0.619096	1.53591	3.93274	8.4e-05	0.000272704
C5orf4	10826	0.6171	1.53379	5.40015	6.66e-08	3.9e-07
FAM167B	84734	0.616554	1.53321	5.31961	1.04e-07	5.89e-07
LRRN2	10446	0.615934	1.53255	3.47221	0.000516197	0.00142082
QRFP	347148	0.615716	1.53232	3.41067	0.000648033	0.00173919
ZDHHC14	79683	0.615141	1.53171	5.90788	3.47e-09	2.56e-08
SULT1B1	27284	0.614915	1.53147	3.10414	0.00190833	0.00462946
TECTA	7007	0.613939	1.53043	5.85113	4.88e-09	3.53e-08
BDH1	622	0.61267	1.52909	7.15065	8.64e-13	1.1e-11
PLXNB3	5365	0.612663	1.52908	3.67966	0.000233549	0.000693611
KCNJ5	3762	0.612034	1.52841	3.32485	0.00088465	0.00230385
CCNB3	85417	0.611869	1.52824	5.76981	7.94e-09	5.52e-08
ROR2	4920	0.611366	1.52771	3.07168	0.0021286	0.00511141
ESRRG	2104	0.609559	1.52579	4.35097	1.36e-05	5.14e-05
ARHGEF37	389337	0.609155	1.52537	3.96948	7.2e-05	0.000237266
NAIP	4671	0.609032	1.52524	4.37765	1.2e-05	4.6e-05
HSP90B1	7184	0.607871	1.52401	7.26472	3.74e-13	5.05e-12
FRMD3	257019	0.607069	1.52316	3.20614	0.00134527	0.00337133
CPEB3	22849	0.606876	1.52296	7.49106	6.83e-14	1.03e-12
PRDM11	56981	0.606514	1.52258	6.5747	4.88e-11	4.86e-10
ACSBG1	23205	0.605835	1.52186	4.77899	1.76e-06	7.91e-06
COPZ2	51226	0.605681	1.5217	4.64954	3.33e-06	1.41e-05
LZTS1	11178	0.605361	1.52136	5.09329	3.52e-07	1.81e-06
DMD	1756	0.602476	1.51832	3.29009	0.00100154	0.00257764
CPT1C	126129	0.601859	1.51767	2.85611	0.00428864	0.00954538
PIK3C2B	5287	0.601712	1.51752	8.06657	7.23e-16	1.47e-14
KBTBD11	9920	0.601711	1.51751	6.5183	7.11e-11	6.92e-10
RND1	27289	0.600969	1.51673	4.22067	2.44e-05	8.83e-05
C6orf154	221424	0.599714	1.51542	5.61242	2e-08	1.3e-07
C14orf132	56967	0.599572	1.51527	4.37733	1.2e-05	4.6e-05
RECK	8434	0.599519	1.51521	10.6748	1.34e-26	1.19e-24
C16orf5	29965	0.599473	1.51516	7.17691	7.13e-13	9.23e-12
WNK3	65267	0.599011	1.51468	3.98778	6.67e-05	0.000221625
WDR63	126820	0.598915	1.51458	3.92435	8.7e-05	0.000281184
PEX5L	51555	0.598711	1.51436	2.95142	0.00316314	0.00727666
ACAT1	38	0.598701	1.51435	6.07308	1.25e-09	1e-08
LOXL2	4017	0.598664	1.51431	5.16935	2.35e-07	1.24e-06
MATN3	4148	0.598308	1.51394	3.2669	0.00108731	0.00277464
TUB	7275	0.597704	1.51331	5.29463	1.19e-07	6.66e-07
MAP6	4135	0.59744	1.51303	6.23696	4.46e-10	3.81e-09
FAM171A2	284069	0.597235	1.51281	4.58612	4.52e-06	1.87e-05
LOC338758	338758	0.596541	1.51209	6.28627	3.25e-10	2.85e-09
ANO6	196527	0.596522	1.51207	5.28068	1.29e-07	7.11e-07
CSGALNACT1	55790	0.596225	1.51176	4.48208	7.39e-06	2.94e-05
SLC1A2	6506	0.595465	1.51096	2.84532	0.00443673	0.00984657
MID1	4281	0.594782	1.51024	5.94597	2.75e-09	2.06e-08
B4GALT6	9331	0.594562	1.51001	5.02124	5.13e-07	2.55e-06
MMP15	4324	0.594534	1.50998	5.26956	1.37e-07	7.52e-07
GPT2	84706	0.59448	1.50993	5.00382	5.62e-07	2.78e-06
TMC7	79905	0.594478	1.50993	5.9152	3.31e-09	2.46e-08
ZFPM2	23414	0.594449	1.5099	4.02916	5.6e-05	0.000188805
CAND2	23066	0.594081	1.50951	6.37238	1.86e-10	1.69e-09
PCDHB15	56121	0.593389	1.50879	3.72155	0.000198007	0.000596176
CC2D2B	387707	0.593379	1.50878	3.27554	0.00105459	0.00269812
CPE	1363	0.593173	1.50856	4.8701	1.12e-06	5.23e-06
SULT1A2	6799	0.593148	1.50854	3.58818	0.000332993	0.000956824
NUCB2	4925	0.592833	1.50821	6.416	1.4e-10	1.29e-09
C3orf52	79669	0.592274	1.50762	4.95643	7.18e-07	3.48e-06
FBLN2	2199	0.591734	1.50706	4.24482	2.19e-05	8e-05
SCTR	6344	0.591672	1.50699	3.19512	0.00139775	0.00349251
LIX1L	128077	0.591131	1.50643	7.78842	6.78e-15	1.2e-13
RASGRP2	10235	0.590993	1.50628	4.42963	9.44e-06	3.68e-05
CDYL2	124359	0.590986	1.50628	4.68296	2.83e-06	1.22e-05
KLF9	687	0.590855	1.50614	7.18088	6.93e-13	9e-12
MAN1C1	57134	0.59033	1.50559	5.80014	6.63e-09	4.68e-08
GJB2	2706	0.590261	1.50552	3.60773	0.000308886	0.000895769
FAM70A	55026	0.590198	1.50545	3.01293	0.00258735	0.00608377
DUSP14	11072	0.589392	1.50461	7.64838	2.04e-14	3.32e-13
RIC8B	55188	0.589129	1.50434	8.47961	2.26e-17	5.79e-16
HIST1H1C	3006	0.588968	1.50417	3.53835	0.000402633	0.00113644
HOXC6	3223	0.58777	1.50292	3.11638	0.00183087	0.00445893
CLCN4	1183	0.587296	1.50243	8.44654	3e-17	7.47e-16
THRSP	7069	0.586907	1.50202	3.21442	0.00130708	0.00328399
GPR132	29933	0.586486	1.50159	3.07882	0.00207824	0.00500062
AKAP12	9590	0.586254	1.50134	4.57581	4.74e-06	1.95e-05
LOC144571	144571	0.586224	1.50131	5.21066	1.88e-07	1.01e-06
NCRNA00173	100287569	0.585523	1.50058	2.92163	0.00348206	0.00793523
TNFRSF19	55504	0.585228	1.50028	3.56419	0.000364978	0.00104109
GPD1	2819	0.585035	1.50008	3.3104	0.000931644	0.00241631
CD24	100133941	0.584722	1.49975	7.20039	6e-13	7.87e-12
SYDE2	84144	0.584345	1.49936	5.62757	1.83e-08	1.2e-07
SMARCA1	6594	0.583999	1.499	9.84825	6.98e-23	3.92e-21
DNAL1	83544	0.583778	1.49877	10.6392	1.96e-26	1.7e-24
MSX1	4487	0.583664	1.49865	4.80437	1.55e-06	7.06e-06
FAM46B	115572	0.583447	1.49843	4.13894	3.49e-05	0.000122284
WWTR1	25937	0.58228	1.49721	6.53835	6.22e-11	6.11e-10
MYO1H	283446	0.581892	1.49681	3.38346	0.00071579	0.00190013
EHD3	30845	0.581877	1.4968	7.46588	8.27e-14	1.24e-12
WFDC1	58189	0.581471	1.49637	4.01159	6.03e-05	0.00020215
GRB14	2888	0.58072	1.49559	4.39691	1.1e-05	4.24e-05
ASRGL1	80150	0.580585	1.49546	5.78883	7.09e-09	4.98e-08
NAT8L	339983	0.580407	1.49527	3.46452	0.000531187	0.00145832
HIST2H2BE	8349	0.579285	1.49411	5.50331	3.73e-08	2.3e-07
TCF15	6939	0.579138	1.49396	3.27899	0.0010418	0.00266924
FJX1	24147	0.578404	1.4932	5.64367	1.66e-08	1.1e-07
SULT1A1	6817	0.578103	1.49288	4.88035	1.06e-06	4.99e-06
ALDH6A1	4329	0.577826	1.4926	5.14715	2.64e-07	1.39e-06
GUCY1A3	2982	0.577707	1.49248	5.39564	6.83e-08	3.99e-07
TTLL9	164395	0.57744	1.4922	4.25009	2.14e-05	7.83e-05
NAV3	89795	0.577247	1.492	3.59296	0.00032694	0.000941205
MAP1LC3A	84557	0.576381	1.4911	5.23781	1.62e-07	8.81e-07
CA8	767	0.576242	1.49096	2.96816	0.00299593	0.00693244
KIAA0556	23247	0.576191	1.49091	9.2173	3.05e-20	1.15e-18
GLIS3	169792	0.576153	1.49087	6.49392	8.36e-11	8.07e-10
CCDC89	220388	0.574999	1.48968	2.99986	0.00270104	0.00631677
FGF12	2257	0.574763	1.48943	2.84477	0.00444432	0.00985973
CXCL12	6387	0.574556	1.48922	3.97639	7e-05	0.000231205
SEMA6B	10501	0.574171	1.48882	4.84755	1.25e-06	5.81e-06
ANKRD46	157567	0.573676	1.48831	8.4418	3.12e-17	7.77e-16
NRG3	10718	0.573325	1.48795	3.3591	0.000781982	0.00205731
RNASE1	6035	0.573176	1.48779	5.28052	1.29e-07	7.12e-07
GRIN2D	2906	0.572406	1.487	4.20373	2.63e-05	9.45e-05
CREB3L1	90993	0.57206	1.48664	3.1176	0.00182328	0.00444194
MAPK10	5602	0.571888	1.48647	6.51337	7.35e-11	7.14e-10
TESC	54997	0.570672	1.48522	3.21788	0.00129141	0.00324968
DYNLRB2	83657	0.570542	1.48508	3.72781	0.000193152	0.000583222
ANO5	203859	0.570167	1.48469	4.20513	2.61e-05	9.4e-05
ABI3	51225	0.569476	1.48398	6.12811	8.89e-10	7.25e-09
NOTCH3	4854	0.568982	1.48348	6.72925	1.71e-11	1.82e-10
SGK1	6446	0.567749	1.48221	4.684	2.81e-06	1.21e-05
PRKCH	5583	0.567743	1.4822	8.55938	1.13e-17	3.04e-16
TMEM45A	55076	0.567686	1.48214	4.07914	4.52e-05	0.000154401
LONRF2	164832	0.567263	1.48171	3.72598	0.000194559	0.000586851
ZNF467	168544	0.566594	1.48102	5.72114	1.06e-08	7.21e-08
FAHD2A	51011	0.566369	1.48079	5.62241	1.88e-08	1.23e-07
SYDE1	85360	0.565601	1.48	8.17795	2.89e-16	6.29e-15
SIRT4	23409	0.565307	1.4797	5.40327	6.54e-08	3.84e-07
MN1	4330	0.565173	1.47957	4.3674	1.26e-05	4.8e-05
SIM2	6493	0.565157	1.47955	5.75	8.92e-09	6.16e-08
FNDC1	84624	0.564114	1.47848	3.18467	0.0014492	0.00360785
PECAM1	5175	0.563953	1.47831	6.03388	1.6e-09	1.25e-08
ITPKB	3707	0.563688	1.47804	8.54141	1.33e-17	3.53e-16
ITM2C	81618	0.563464	1.47781	5.31248	1.08e-07	6.1e-07
HTRA3	94031	0.563394	1.47774	2.90024	0.00372882	0.00844014
UPB1	51733	0.563194	1.47754	3.4317	0.000599805	0.00162202
ACTA2	59	0.562367	1.47669	5.14445	2.68e-07	1.4e-06
ADD3	120	0.562366	1.47669	7.36392	1.79e-13	2.55e-12
NEURL1B	54492	0.562228	1.47655	6.29079	3.16e-10	2.77e-09
STXBP6	29091	0.5619	1.47621	4.62537	3.74e-06	1.57e-05
SPTBN1	6711	0.56177	1.47608	8.00916	1.15e-15	2.28e-14
C12orf72	254013	0.561699	1.47601	8.68109	3.92e-18	1.11e-16
NCRNA00086	399668	0.561224	1.47552	3.76397	0.000167239	0.000512637
IFITM2	10581	0.560631	1.47491	5.71431	1.1e-08	7.48e-08
NTN1	9423	0.560607	1.47489	3.66684	0.000245563	0.000725651
PTGIR	5739	0.560549	1.47483	4.62334	3.78e-06	1.58e-05
KLHL8	57563	0.559075	1.47332	6.1015	1.05e-09	8.49e-09
ADAL	161823	0.558613	1.47285	7.75093	9.12e-15	1.57e-13
FAM116A	201627	0.558123	1.47235	9.56904	1.08e-21	5.12e-20
TSHR	7253	0.556853	1.47106	7.26673	3.68e-13	5e-12
ATP5B	506	0.556711	1.47091	6.98093	2.93e-12	3.47e-11
ATP7B	540	0.555014	1.46918	5.58927	2.28e-08	1.46e-07
PKDCC	91461	0.55444	1.4686	3.93408	8.35e-05	0.000271478
LOC100131193	100131193	0.554052	1.4682	5.9371	2.9e-09	2.17e-08
FMOD	2331	0.553852	1.468	4.04358	5.26e-05	0.000178194
SYS1-DBNDD2	767557	0.553827	1.46797	5.45625	4.86e-08	2.93e-07
C4orf12	404201	0.553721	1.46787	4.79532	1.62e-06	7.36e-06
HMCN1	83872	0.553689	1.46783	3.82228	0.000132223	0.00041315
RAB9B	51209	0.553413	1.46755	4.23785	2.26e-05	8.24e-05
MYCBPAP	84073	0.553354	1.46749	3.80128	0.000143951	0.000447041
FLJ36777	730971	0.552678	1.46681	4.59608	4.31e-06	1.78e-05
ZNF541	84215	0.552664	1.46679	3.27697	0.00104926	0.00268526
RAPGEF2	9693	0.552534	1.46666	8.43523	3.31e-17	8.17e-16
SPARC	6678	0.55154	1.46565	7.13628	9.59e-13	1.22e-11
EIF2B2	8892	0.551089	1.46519	7.64536	2.08e-14	3.39e-13
SCARB1	949	0.551064	1.46517	5.60608	2.07e-08	1.34e-07
TPST1	8460	0.550968	1.46507	8.93828	3.95e-19	1.28e-17
SCARF1	8578	0.550331	1.46442	7.86548	3.68e-15	6.77e-14
PKD1L1	168507	0.55003	1.46412	5.29464	1.19e-07	6.66e-07
FOS	2353	0.549457	1.46354	3.04428	0.00233241	0.00554159
JUN	3725	0.549394	1.46347	3.99318	6.52e-05	0.000217056
TEX2	55852	0.549357	1.46343	6.36152	2e-10	1.8e-09
ZNF219	51222	0.549235	1.46331	6.71293	1.91e-11	2.03e-10
PTCH2	8643	0.549145	1.46322	3.79153	0.000149724	0.000463671
POPDC2	64091	0.549046	1.46312	5.86452	4.5e-09	3.27e-08
ID4	3400	0.549033	1.4631	4.96719	6.79e-07	3.31e-06
MAP1B	4131	0.548747	1.46282	5.62798	1.82e-08	1.2e-07
NXPH3	11248	0.548568	1.46263	5.17696	2.26e-07	1.2e-06
SYN2	6854	0.548186	1.46225	3.1572	0.00159291	0.00392708
GJD3	125111	0.548109	1.46217	5.51812	3.43e-08	2.14e-07
KCNE2	9992	0.548077	1.46214	5.75523	8.65e-09	5.98e-08
LOC100286844	100286844	0.547865	1.46192	6.12115	9.29e-10	7.55e-09
ALDH9A1	223	0.547103	1.46115	7.90101	2.77e-15	5.18e-14
OR51E1	143503	0.547081	1.46113	4.70185	2.58e-06	1.12e-05
HAS3	3038	0.546706	1.46075	3.68052	0.000232761	0.000691619
CTGF	1490	0.546072	1.4601	3.26867	0.00108053	0.00275972
APOO	79135	0.545695	1.45972	7.17795	7.08e-13	9.17e-12
CALHM2	51063	0.545527	1.45955	6.30495	2.88e-10	2.54e-09
CSRNP1	64651	0.544999	1.45902	5.00609	5.55e-07	2.75e-06
SPTBN5	51332	0.544671	1.45869	4.99472	5.89e-07	2.9e-06
KILLIN	100144748	0.544605	1.45862	6.49722	8.18e-11	7.91e-10
DLD	1738	0.54422	1.45823	8.06054	7.6e-16	1.54e-14
MEIS1	4211	0.54415	1.45816	4.03244	5.52e-05	0.000186219
TRIM16	10626	0.544027	1.45804	5.0857	3.66e-07	1.87e-06
CHCHD10	400916	0.543038	1.45704	3.62876	0.000284786	0.000830085
KCNC4	3749	0.542353	1.45635	7.04631	1.84e-12	2.24e-11
KIAA1274	27143	0.540836	1.45482	6.37958	1.78e-10	1.62e-09
DIP2C	22982	0.540759	1.45474	5.658	1.53e-08	1.02e-07
FAM194A	131831	0.540661	1.45464	3.15915	0.0015823	0.00390417
PPP2R2B	5521	0.540585	1.45456	3.24865	0.00115955	0.00294542
FAM133A	286499	0.539589	1.45356	2.8699	0.00410599	0.00919183
LEKR1	389170	0.539106	1.45307	4.56909	4.9e-06	2.01e-05
GPT	2875	0.538985	1.45295	2.95897	0.00308674	0.0071175
HIRA	7290	0.537927	1.45189	6.9356	4.04e-12	4.73e-11
ABHD6	57406	0.537868	1.45183	7.10115	1.24e-12	1.55e-11
ADCY9	115	0.53765	1.45161	7.18167	6.89e-13	8.95e-12
DKK3	27122	0.537282	1.45124	4.9487	7.47e-07	3.61e-06
RANBP10	57610	0.536444	1.45039	7.25392	4.05e-13	5.44e-12
ABCA2	20	0.53643	1.45038	6.14748	7.87e-10	6.45e-09
RAB19	401409	0.535245	1.44919	3.75723	0.000171804	0.000525085
FAM117A	81558	0.534811	1.44875	8.27093	1.33e-16	3.02e-15
HSPC159	29094	0.534638	1.44858	5.88147	4.07e-09	2.97e-08
LOC100134229	100134229	0.534134	1.44807	5.42719	5.72e-08	3.4e-07
BRP44L	51660	0.533612	1.44755	6.0317	1.62e-09	1.26e-08
LRRC48	83450	0.533235	1.44717	5.32877	9.89e-08	5.61e-07
HERPUD1	9709	0.533189	1.44712	6.98701	2.81e-12	3.34e-11
NGFRAP1	27018	0.532686	1.44662	7.66327	1.81e-14	2.98e-13
CASKIN2	57513	0.531428	1.44536	10.6658	1.47e-26	1.31e-24
PEX11A	8800	0.531358	1.44529	7.05212	1.76e-12	2.16e-11
CCDC11	220136	0.530834	1.44476	5.90808	3.46e-09	2.56e-08
SH3BGR	6450	0.530442	1.44437	4.71914	2.37e-06	1.04e-05
WDR17	116966	0.530383	1.44431	4.2093	2.56e-05	9.24e-05
C5orf30	90355	0.530382	1.44431	4.96266	6.95e-07	3.38e-06
MCCC2	64087	0.530262	1.44419	6.94379	3.82e-12	4.47e-11
MAP2K6	5608	0.529705	1.44363	4.25185	2.12e-05	7.77e-05
RFPL1S	10740	0.529585	1.44351	2.85619	0.00428754	0.00954412
COL4A5	1287	0.529369	1.4433	4.12434	3.72e-05	0.000129286
C7orf61	402573	0.529315	1.44324	2.92616	0.0034317	0.00782751
CETN4P	729338	0.529184	1.44311	3.74417	0.00018099	0.000550225
C12orf61	283416	0.529076	1.443	6.06688	1.3e-09	1.04e-08
NOTCH1	4851	0.528703	1.44263	7.40862	1.28e-13	1.86e-12
SNURF	8926	0.527483	1.44141	3.4012	0.000670898	0.0017927
TMEM37	140738	0.527293	1.44122	5.94361	2.79e-09	2.09e-08
MEF2C	4208	0.527275	1.4412	6.47888	9.24e-11	8.85e-10
CCDC81	60494	0.527222	1.44115	4.7723	1.82e-06	8.13e-06
PRCP	5547	0.526942	1.44087	9.82294	8.97e-23	4.97e-21
LRIG1	26018	0.526645	1.44057	5.51559	3.48e-08	2.16e-07
COL14A1	7373	0.526581	1.44051	3.80643	0.000140985	0.000438369
TMEM164	84187	0.526352	1.44028	5.9543	2.61e-09	1.97e-08
PDIA3P	171423	0.526247	1.44018	7.58974	3.21e-14	5.1e-13
ZSCAN5B	342933	0.525836	1.43977	2.89874	0.0037467	0.00847521
RAB41	347517	0.525724	1.43966	4.90551	9.32e-07	4.42e-06
CANX	821	0.525717	1.43965	9.46515	2.93e-21	1.3e-19
MED12L	116931	0.525216	1.43915	3.23933	0.00119811	0.00303291
CDH23	64072	0.525161	1.43909	4.02561	5.68e-05	0.000191527
NAP1L3	4675	0.52502	1.43895	5.04948	4.43e-07	2.23e-06
EGFL7	51162	0.524949	1.43888	4.5376	5.69e-06	2.31e-05
AMDHD1	144193	0.524734	1.43867	3.01799	0.00254457	0.00599271
ANXA6	309	0.524103	1.43804	6.31803	2.65e-10	2.35e-09
STK32B	55351	0.523872	1.43781	4.08756	4.36e-05	0.00014945
HMGCS1	3157	0.523806	1.43774	10.428	1.85e-25	1.44e-23
ARHGEF10	9639	0.52273	1.43667	8.05802	7.75e-16	1.57e-14
FBXO36	130888	0.52267	1.43661	7.91374	2.5e-15	4.72e-14
CDKL1	8814	0.522286	1.43623	3.55368	0.000379875	0.00107976
FAM181A	90050	0.522034	1.43598	2.96301	0.00304652	0.00703664
FHDC1	85462	0.521866	1.43581	5.04462	4.54e-07	2.28e-06
FILIP1	27145	0.521625	1.43557	3.5878	0.000333477	0.000957848
GFOD1	54438	0.521017	1.43497	5.96886	2.39e-09	1.81e-08
PRRT1	80863	0.520496	1.43445	3.0704	0.00213774	0.00513059
CMBL	134147	0.519871	1.43383	5.6664	1.46e-08	9.73e-08
LYRM7	90624	0.519154	1.43311	8.04557	8.58e-16	1.72e-14
NNT	23530	0.518918	1.43288	5.20028	1.99e-07	1.06e-06
TMEM161A	54929	0.51878	1.43274	6.54818	5.82e-11	5.75e-10
LOC654433	654433	0.518533	1.4325	3.46335	0.000533489	0.00146343
NID2	22795	0.518474	1.43244	5.46158	4.72e-08	2.85e-07
LRRC2	79442	0.518374	1.43234	4.02547	5.69e-05	0.000191575
SELENBP1	8991	0.517636	1.43161	4.92393	8.48e-07	4.06e-06
C9orf43	257169	0.51755	1.43152	3.48242	0.000496904	0.00137283
CLYBL	171425	0.517462	1.43144	6.25659	3.93e-10	3.39e-09
ACADM	34	0.517351	1.43132	6.90486	5.03e-12	5.77e-11
FBXO16	157574	0.51629	1.43027	5.92288	3.16e-09	2.35e-08
TGFBR3	7049	0.515763	1.42975	5.59369	2.22e-08	1.43e-07
SYNGR1	9145	0.515628	1.42962	3.92598	8.64e-05	0.000279594
PRMT3	10196	0.51509	1.42908	6.76663	1.32e-11	1.43e-10
KIAA0802	23255	0.514968	1.42896	3.88921	0.00010057	0.000320855
ANKRD34A	284615	0.514778	1.42877	4.13023	3.62e-05	0.000126389
RPS6KA5	9252	0.514292	1.42829	5.30833	1.11e-07	6.22e-07
SERPINI1	5274	0.513424	1.42743	6.81375	9.51e-12	1.05e-10
OPRL1	4987	0.512997	1.42701	5.28227	1.28e-07	7.06e-07
NOS2	4843	0.512559	1.42658	2.98161	0.0028674	0.00666807
MT1X	4501	0.51243	1.42645	3.1402	0.00168835	0.00413594
DACH1	1602	0.511125	1.42516	3.05308	0.00226508	0.00540187
TMOD1	7111	0.511111	1.42515	3.72188	0.000197745	0.000595653
LOC100302640	100302640	0.511022	1.42506	3.85208	0.000117118	0.00036894
PRKCQ	5588	0.510798	1.42484	6.04849	1.46e-09	1.15e-08
C2orf73	129852	0.510621	1.42466	3.25493	0.00113422	0.00288686
RNF122	79845	0.510259	1.42431	5.24259	1.58e-07	8.6e-07
GPM6B	2824	0.510236	1.42428	4.16038	3.18e-05	0.00011249
MAOA	4128	0.509797	1.42385	4.83299	1.34e-06	6.2e-06
GUSBP3	653188	0.50973	1.42378	4.78622	1.7e-06	7.66e-06
[truncated: 6,011 more rows]
